# Supplementary material for: The Potential Roles of Host Cell miRNAs in Fine-Tuning Bovine Coronavirus (BCoV) Molecular Pathogenesis, Tissue Tropism, and Immune Regulation
Source: MDPI journal article supplement (doi:10.3390/microorganisms12050897), 2024-04-30
Supplement: s1 [file s1]

| 1. miR Name                          | leftmost position of predicted target site | folding energy (in - Kcal/mol) | heteroduplex                                                                   | p value |
|--------------------------------------|--------------------------------------------|--------------------------------|--------------------------------------------------------------------------------|---------|
| 2. bta-miR-101<br>MIMAT0003520       | 1909                                       | -10.20                         | TTTAGTTTAGAAACTTTTACTGTT<br>  :              <br>AAGTCAA--TAGTG-TCATGACAT      | 3.9E-1  |
| 3. bta-miR-21-3p<br>MIMAT0003745     | 2021                                       | -15.10                         | ACGCAGGTAAAACTGCCATGCTGTT<br>:    :     :       <br>TCTGTCGG--GTAGCTG--ACGACAA | 3.57E-1 |
| 4. bta-miR-410<br>MIMAT0009311       | 2243                                       | -6.10                          | TTTTGC--ATGGTGCTTATATA<br>           <br>TGTCCGGTAGACAC-AATATAA                | 2.61E-1 |
| 5. bta-miR-2396<br>MIMAT0011949      | 2864                                       | -10.00                         | CTATT--TTAAACACTGCATGT<br> : :         <br>GGTAGTTCTGGGGTCACGTACT              | 1.36E-1 |
| 6. bta-miR-410<br>MIMAT0009311       | 3495                                       | -16.30                         | GCAGGATCTTTGGGTGTTATATA<br>:     :  :      <br>TGTC--GGTAG-ACACAATATAA         | 2.58E-1 |
| 7. bta-miR-2285dc<br>MIMAT0046710    | 5796                                       | -9.50                          | TAAAAATTGAAACAAACTTTTA<br>    : :       <br>CTTTTGGATT-TATTGAAAAA              | 2.39E-2 |
| 8. bta-miR-2285cr<br>MIMAT0046691    | 5797                                       | -9.90                          | AAAAATTGAAACAAACTTTT<br>   :          <br>TCTTGGACTT-GCTTGAAAA                 | 2.39E-2 |
| 9. bta-miR-503-3p<br>MIMAT0025558    | 5897                                       | -11.90                         | ACGG-AGGTAAGTATTATACTCA<br>    : :  :      <br>GGCCCGTCGTCTTTGTTATGAGG         | 6.48E-2 |
| 10. bta-miR-2406<br>MIMAT0011964     | 6171                                       | -13.30                         | AAGCCATG-AGCAAGCTTCCCTC<br>           <br>TTAGGT-CGAAGGAAGAAGGGAA              | 3.34E-1 |
| 11. bta-miR-219-3p<br>MIMAT0012547   | 6175                                       | -10.60                         | CATGAGCAAGCTTCCCTCAATTCT<br>      :         <br>GT-CT--ACAGGTCGGTGTAAAGA       | 3.34E-1 |
| 12. bta-miR-3578<br>MIMAT0016934     | 6911                                       | -8.90                          | TTGGTAAGATCGCACAGTGGATTA<br>:           <br>CTTCA-ACAAGC--ACCACCTAAG           | 2.28E-1 |
| 13. bta-miR-2284t-5p<br>MIMAT0011831 | 8913                                       | -5.70                          | CTCTGCTTG-CACTATGTTTG<br>: :       <br>TTTTTGGGCTCACTTACAAAG                   | 2.69E-1 |
| 14. bta-miR-21-3p<br>MIMAT0003745    | 9311                                       | -11.40                         | TTGCTGGTGCTAT-ACTTGCTGTA<br>:  : :   :       <br>TCTG-TCG-GGTAGCTGACGACAA      | 2.28E-1 |

| 1. miR Name                          | leftmost position of predicted target site | folding energy (in - Kcal/mol) | heteroduplex                                                                    | p value |
|--------------------------------------|--------------------------------------------|--------------------------------|---------------------------------------------------------------------------------|---------|
| 15. bta-miR-2406<br>MIMAT0011964     | 9500                                       | -16.40                         | ATGCCACGCTTT - -ATTTCCCTT<br>       : :   <br>TTAGGT - CGAAGGAAGAAGGGAA         | 3.48E-1 |
| 16. bta-miR-410<br>MIMAT0009311      | 10523                                      | -6.50                          | AATTGCCCCGTTTCAGGATTATATA<br>           <br>TGTCCGG - -TAGACACAATATAA           | 8.51E-2 |
| 17. bta-miR-2396<br>MIMAT0011949     | 11761                                      | -8.70                          | AATTGCTTGCAACATTTGCATGT<br>:         <br>GGTAGTTCTGGGGT - CACGTACT              | 3.25E-1 |
| 18. bta-miR-17-5p<br>MIMAT0003815    | 11801                                      | -16.00                         | TGTGGCAATATTGTA - GCACTTTG<br>:   :        <br>TGATGGACGTGACATTCGTGAAAC         | 6.2E-2  |
| 19. bta-miR-200b<br>MIMAT0003842     | 11920                                      | -8.80                          | AGCAAGTGCCCTGACTAGTATTG<br>  :    :    <br>GTAGTAATGG - TCCGTCATAAT             | 1.75E-1 |
| 20. bta-miR-450b<br>MIMAT0024576     | 12557                                      | -6.60                          | TATCTGCTACCGCTTTGCAAAA<br>  :        <br>ATAAGTCCTTGTATAACGTTTT                 | 3.29E-1 |
| 21. bta-miR-2284t-5p<br>MIMAT0011831 | 14999                                      | -12.60                         | TATGACTGG - CAGAATGTTTC<br>:    :          <br>TTTTTGGGCTCACTTACAAAG            | 9.48E-2 |
| 22. bta-miR-455-3p<br>MIMAT0003836   | 16426                                      | -14.60                         | TAGCTAGTTGTAAATGGACTGA<br>   :        <br>TCACATATACGGGTACCTGACG                | 3.57E-1 |
| 23. bta-miR-2483-3p<br>MIMAT0012076  | 16432                                      | -9.50                          | GTTGTAAATGGACT - GATGTTG<br>   : :    :    <br>AGAGAGTTGGTTGGTCTACAAA           | 3.57E-1 |
| 24. bta-miR-2285bz<br>MIMAT0046646   | 16731                                      | -7.40                          | TATCGCGCCACAAC - CACTTATA<br>:              <br>TTTTTG - GGT - TTGCTTGAATAA     | 8.13E-2 |
| 25. bta-miR-450b<br>MIMAT0024576     | 18487                                      | -7.30                          | GTCTCCGCTAC - -TTTGCAAAA<br>               <br>ATAAGTCCTTGTATAACGTTTT           | 1.95E-1 |
| 26. bta-miR-410<br>MIMAT0009311      | 18666                                      | -5.30                          | TCAAGTAATCATGATTTATATT<br>     :             <br>TGTCCGGTAG - ACACAATATAA       | 2.36E-2 |
| 27. bta-miR-3600<br>MIMAT0016932     | 19031                                      | -12.80                         | TTTGTGTATGTTTTGGAAGTGT<br>   :     :        <br>TTCGACGGTCAACTTCTTGACA          | 2.42E-1 |
| 28. bta-miR-3956<br>MIMAT0025544     | 19867                                      | -14.80                         | ATAATGGCGTTTA - CATTTCCACGA<br>   :    :         <br>GGGACTGGAAGTCGT - -AGGTGCA | 3.48E-1 |

| 1. miR Name                          | leftmost position of predicted target site | folding energy (in - Kcal/mol) | heteroduplex                                                                    | p value |
|--------------------------------------|--------------------------------------------|--------------------------------|---------------------------------------------------------------------------------|---------|
| 29. bta-miR-345-5p<br>MIMAT0003800   | 20031                                      | -14.60                         | TTCGACAGCCTGAGAGTCAGC<br>  :      <br>TCGTGACCTGATCCTCAGTCG                     | 7.09E-2 |
| 30. bta-miR-2448-3p<br>MIMAT0012026  | 20262                                      | -13.70                         | GTTTATGG-TAATTTCAACCAG<br>:  : :      <br>TGGGTGCCTAGGTTAGTTGGTG                | 1.95E-1 |
| 31. bta-miR-2415-5p<br>MIMAT0011978  | 20355                                      | -13.40                         | GAGTTTGTTCATACGACTCCA<br> :   :     <br>ACCGGCCG-TCCTGGCTGAGGG                  | 1.89E-1 |
| 32. bta-miR-450b<br>MIMAT0024576     | 21169                                      | -5.80                          | TTTTC-TGCACA-AATGCAAAT<br>              <br>ATAAGTCCTTGTATAACGTTTT              | 2.01E-1 |
| 33. bta-miR-2430<br>MIMAT0012000     | 21541                                      | -12.00                         | TTAATTTTCC--ACTTACCCAGT<br>:    :     <br>GGCCTTTGGGGACGGCTGGGTCT               | 1.45E-1 |
| 34. bta-miR-219-3p<br>MIMAT0012547   | 21945                                      | -11.40                         | TTCATAAACAGCATGCAATTCA<br>     :      <br>GTCTACAGGTCG-GTGTTAAGA                | 9.19E-2 |
| 35. bta-miR-2446<br>MIMAT0012023     | 22625                                      | -8.00                          | GGCGAAGGTCAACAAAT-TATTTTT<br>     :           <br>CCG-GGCTA-AAGTTTATATAAAAT     | 1.86E-1 |
| 36. bta-miR-224<br>MIMAT0009271      | 24373                                      | -10.10                         | TATTATGTCTGCCTTTGACTTG<br>            <br>ATTTGCCTTGGTGATCACTGAAC               | 2.98E-1 |
| 37. bta-miR-2284t-5p<br>MIMAT0011831 | 24935                                      | -11.80                         | ATTTACCTGCTGCTAATGTTTC<br>   :         <br>TTTTTGGGC-TCACTTACAAAG               | 9.48E-2 |
| 38. bta-miR-2327<br>MIMAT0011856     | 25269                                      | -18.49                         | TACAGGGCCTTACAAGTGCCCCA<br>        :     <br>CGGTCACGAACTCAGAGCGGGGA            | 1.04E-1 |
| 39. bta-miR-2285cr<br>MIMAT0046691   | 25659                                      | -7.70                          | CTTAAC--AAACAGAACTTTT<br>           <br>TCTTTGGACTTG-CTTGAAAA                   | 7.54E-2 |
| 40. bta-miR-11999<br>MIMAT0046658    | 27145                                      | -8.70                          | GCGAAGGTTAGTCCCGGTCTGT<br>        :      <br>CGGATACTCTTATACCCAGACT             | 2.14E-1 |
| 41. bta-miR-21-3p<br>MIMAT0003745    | 27825                                      | -17.20                         | TAATAGCTACCACAATGCCTGCTGTT<br> :         :      <br>TCTGTCTG--GGT--AGCTGACGACAA | 2.25E-1 |
| 42. bta-miR-2285cr<br>MIMAT0046691   | 28049                                      | -7.50                          | GGTAGACCT-TAT-AACTTTA<br>:    :      :     <br>TC-TTTGGACTTGCTTGAAAA            | 2.5E-1  |

| 1. miR Name                          | leftmost position of predicted target site | folding energy (in - Kcal/mol) | heteroduplex                                                                  | p value |
|--------------------------------------|--------------------------------------------|--------------------------------|-------------------------------------------------------------------------------|---------|
| 43. bta-miR-455-3p<br>MIMAT0003836   | 28718                                      | -15.10                         | ACCAGTTTACACC-TGGACTGC<br>        <br>TCACATATACGGGTACCTGACG                  | 1.17E-2 |
| 44. bta-miR-2468<br>MIMAT0012058     | 28739                                      | -8.90                          | TGATGAAGCTATTAAATTCCTAA<br>         :       <br>ACTGTT-AGAAGGTACAAGGATA       | 1.17E-2 |
| 45. bta-miR-2284t-5p<br>MIMAT0011831 | 28826                                      | -6.40                          | TACAAGTCGCAGT--ATGTTTG<br>   :          <br>TTTTTGGGC-TACTTACAAAG             | 1.04E-1 |
| 46. bta-miR-2285cr<br>MIMAT0046691   | 29373                                      | -5.86                          | AGAAATAATATCTAAACTTTA<br>      :      <br>TCTTTG-GACTTGCTTGAAAA               | 3.85E-1 |
| 47. bta-miR-12030<br>MIMAT0046723    | 29852                                      | -20.60                         | GGCTGATGTCAATACCCCGGC<br>    :           <br>CCGGC--GAGGCCCGGGGCC             | 1.98E-1 |
| 48. bta-miR-2285bu<br>MIMAT0046640   | 29958                                      | -14.10                         | ATTGAAGGCTCAGGAAGGTCTG<br>:    :           <br>GGTTTTTCAAGTAAGTCCAGAA         | 2.01E-1 |
| 49. bta-miR-17-5p<br>MIMAT0003815    | 30467                                      | -7.60                          | TAGATTTG-ACAGTA--CACTTTC<br>  :               <br>TGATGGACGTGACATTTCGTGAAAC   | 3.29E-1 |
| 50. bta-miR-12006<br>MIMAT0046667    | 148                                        | -12.60                         | CTGTT-AACAG-CTTTCAGCC<br>                 <br>CCCAACTTGTCTCAAAGTCGT           | 8.51E-2 |
| 51. bta-miR-2486-3p<br>MIMAT0012082  | 1723                                       | -6.82                          | GTAAAGGA-AACAAATCTCATTT<br>:           :      <br>TTGTGTCTAAAAACGGGGAGTAAA    | 3.11E-2 |
| 52. bta-miR-144<br>MIMAT0009234      | 1910                                       | -8.10                          | TTAGTTTAGAACTTTTACTGTT<br>:      :           <br>GATCATGTAGTAGA-TATGACAT      | 3.9E-1  |
| 53. bta-miR-2284p<br>MIMAT0011885    | 2940                                       | -8.20                          | TGATGCCATAGAAGAGAACTTTCT<br>                    <br>TTTTAGG--GCTT--GTTTGAAAGT | 2.42E-1 |
| 54. bta-miR-2356<br>MIMAT0011893     | 3262                                       | -14.90                         | GTGGAGACATCTGATTCACAAGT<br>      :      <br>GGAGTCTGAGGGAGTAGTGTCT            | 2.65E-1 |
| 55. bta-miR-2284h-5p<br>MIMAT0012019 | 3430                                       | -7.40                          | TGCTGGTTGCGATCAGTTTTGGC<br>:           <br>TTTGGGCTTGCT--TGAAAACCC            | 1.22E-2 |
| 56. bta-miR-12050<br>MIMAT0046753    | 4798                                       | -13.50                         | GGGGGCATAGAT-ATATGCAGCCA<br>   :   :      <br>TCATCCTTCCTGCTGT-CGTCGGT        | 3.16E-1 |

| 1. miR Name                           | leftmost position of predicted target site | folding energy (in - Kcal/mol) | heteroduplex                                                                                  | p value |
|---------------------------------------|--------------------------------------------|--------------------------------|-----------------------------------------------------------------------------------------------|---------|
| 57. bta-miR-2284h-5p<br>MIMAT0012019  | 4815                                       | -11.50                         | CAGCCAGGATAAAGTTTTTGGT<br>  :       :       :          <br>TTTGGGCTTGCTT-GAAAACCC             | 3.16E-1 |
| 58. bta-miR-2284h-5p<br>MIMAT0012019  | 5493                                       | -8.90                          | GGACGCTGTTATG-CATTTTGGT<br>:       :     :          <br>TTTG-GGC-TTGCTTGAAAACCC               | 2.86E-1 |
| 59. bta-miR-374b<br>MIMAT0009302      | 5893                                       | -10.00                         | TGTGACGGAGGTAAGTATTATAC<br>                   <br>GTGAATCGTCCA-ACATAATATA                     | 6.48E-2 |
| 60. bta-miR-496<br>MIMAT0009336       | 5895                                       | -6.30                          | TGACGGAGGTAAGTATTATACTCA<br>                   <br>CTCTAACCGGTACAT--TATGAGT                   | 6.48E-2 |
| 61. bta-miR-2284h-5p<br>MIMAT0012019  | 6134                                       | -8.90                          | GGGGTTG-TATTACTTTTGGT<br>: : : : :                <br>TTTGGGCTTGCTTGAAAACCC                   | 2.14E-1 |
| 62. my-mir-noheader-provided-48       | 8371                                       | -12.00                         | TGTAAAACTGGTTTGAAACTGAAGCTT<br>  :       :       :          <br>CCGTTCTG-TC--TCTGGTGCTTCGAA   | 2.69E-1 |
| 63. bta-miR-12006<br>MIMAT0046667     | 8550                                       | -12.60                         | ACACAAATCAGATTTTTCAGCT<br>                   <br>CCCAACTTGTCTCAAAGTCGT                        | 5.51E-2 |
| 64. bta-miR-9-3p<br>MIMAT0012549      | 9891                                       | -7.10                          | TGGTAGTGATGTGCTTTAC<br>:       :     :          <br>GCCAATA-GAT-CGAAATA                       | 1.42E-1 |
| 65. bta-miR-2285ai-5p<br>MIMAT0040946 | 10237                                      | -8.70                          | CGTACGCCAAAAATATACATTG<br>                   <br>TTTTTTCGGTT-CGCTTGTAATA                      | 1.14E-1 |
| 66. bta-miR-2285e<br>MIMAT0024580     | 10492                                      | -15.10                         | TATGGTCCTTATAAGGATGCTCAGGTTG<br>  :           :              <br>TAATC-GG-TTTTTCAAGCAAGTCCAAA | 8.51E-2 |
| 67. bta-miR-16b<br>MIMAT0003525       | 10564                                      | -12.50                         | GCATGGCTTTA--TGCTGCTA<br>                   <br>CGGTTATAAATGCACGACGAT                         | 8.51E-2 |
| 68. bta-miR-9-3p<br>MIMAT0012549      | 10685                                      | -7.90                          | TTGTTATAGATGCTTTAG<br>                   <br>GCCAATA-GATCGAAATA                               | 3.07E-1 |
| 69. bta-miR-9-3p<br>MIMAT0012549      | 11380                                      | -7.60                          | TGG-ACAACAGCTTTAT<br>:                    <br>GCCAATAGATCGAAATA                               | 1.86E-1 |
| 70. bta-miR-2329-3p<br>MIMAT0011859   | 11436                                      | -10.30                         | GAATGTT-TTGTATTTACAGA<br>  : : : :            <br>TGAATAGTCGAGTGTAGTGTCT                      | 8.26E-2 |

| 1. miR Name                           | leftmost position of predicted target site | folding energy (in - Kcal/mol) | heteroduplex                                                               | p value |
|---------------------------------------|--------------------------------------------|--------------------------------|----------------------------------------------------------------------------|---------|
| 71. bta-miR-2451<br>MIMAT0012031      | 11444                                      | -15.60                         | TGTATTTACAGATATACCTCAA<br>  : : :      :     <br>AGGTGAGAGGTCT- CGTGGAGTA  | 8.26E-2 |
| 72. bta-let-7i MIMAT0003851           | 11446                                      | -15.50                         | TATTTACAGAT - - ATACCTCA<br>   : :      <br>TTGTCGTGTTTGATGATGGAGT         | 8.26E-2 |
| 73. bta-miR-2284h-5p<br>MIMAT0012019  | 11658                                      | -13.20                         | GCTTAATTTTAAGCTTTTGGG<br> :     <br>TTTGGGCTTGCTTGAAAACCC                  | 3.07E-1 |
| 74. bta-miR-2285ai-5p<br>MIMAT0040946 | 11760                                      | -9.00                          | TAATTGCT - TGC - AACATTTG<br>     :         <br>TTTTTCGGTTCGCTTGTAATA      | 3.25E-1 |
| 75. bta-miR-2349<br>MIMAT0011884      | 11907                                      | -16.20                         | AGCTGCTGTGGATAGCAAGTGCCT<br>      :        <br>ACTCAGACTCTGGTC - TTCACGGT  | 1.75E-1 |
| 76. bta-miR-9-3p<br>MIMAT0012549      | 11975                                      | -6.90                          | CTGTTTTGCAGGCTTTAC<br>      :   <br>GCCAA - TAGATCGAAATA                   | 2.39E-1 |
| 77. bta-miR-12006<br>MIMAT0046667     | 13469                                      | -8.10                          | TAATTGCTGCCG - TTTTCAGCG<br>    :         <br>CCCAAC - TTGTCTCAAAGTCGT     | 3.76E-1 |
| 78. bta-miR-2356<br>MIMAT0011893      | 14760                                      | -14.40                         | GGGTGTATACCGGCATCACAAGT<br>        <br>GGAGTCTGAGGGAGTAGTGTCT              | 2.35E-1 |
| 79. bta-miR-12011<br>MIMAT0046679     | 14827                                      | -9.89                          | AATTTGGAAAAGCCAGGCTCTA<br>   :      <br>ACAAACTCAGAGTACCCGAGAG             | 6.08E-3 |
| 80. bta-miR-2329-3p<br>MIMAT0011859   | 15514                                      | -10.90                         | TTGATTCAACCTT - TGTCACAGA<br>      : :       <br>TGAATAGT - CGAGTGTAGTGTCT | 3.2E-1  |
| 81. bta-miR-2451<br>MIMAT0012031      | 15714                                      | -11.90                         | GACAT - AAACAATGGACCTCAT<br>  :           <br>AGGTGAGAGGTCTCGTGGAGTA       | 1.15E-2 |
| 82. bta-miR-2359<br>MIMAT0011897      | 16315                                      | -8.30                          | GTGAAGATCATAAGCCACAATA<br>:        :        <br>TTTTTCTTTTGTT - - GTGTTAG  | 1.36E-1 |
| 83. bta-miR-453<br>MIMAT0009325       | 16723                                      | -14.30                         | GTGTGTATTATCGCGCCACAACCA<br> : : :         <br>ACGCTTGAGTGGTGC - CTGTTGGA  | 8.13E-2 |
| 84. bta-miR-2285ai-5p<br>MIMAT0040946 | 16866                                      | -5.40                          | AGTGTGCT - - TGAGACATTTT<br>  : :   <br>TTTTTCGGTTCGCTTGTAATA              | 2.82E-1 |

| 1. miR Name                           | leftmost position of predicted target site | folding energy (in - Kcal/mol) | heteroduplex                                                                       | p value |
|---------------------------------------|--------------------------------------------|--------------------------------|------------------------------------------------------------------------------------|---------|
| 85. bta-miR-2285e<br>MIMAT0024580     | 19257                                      | -10.21                         | GATGGC-ATGGATGCTAAGCAGGTTG<br> :         <br>TAATCGGTTTTTCAAGCAAGTCCAAA            | 2.46E-1 |
| 86. bta-miR-2356<br>MIMAT0011893      | 19300                                      | -17.10                         | CC-GCCACTT--GCATCACAAGA<br>      :              <br>GGAGTCTGAGGGAGTAGTGTCT         | 2.46E-1 |
| 87. bta-miR-2285ai-5p<br>MIMAT0040946 | 19863                                      | -8.00                          | TCTAATAATGGCGTTTACATTTTC<br>:              <br>TTTTTCGGTTCGC--TTGTAAAA             | 3.48E-1 |
| 88. bta-miR-12006<br>MIMAT0046667     | 20006                                      | -12.40                         | GGTCAGGATGTCATCTTCAGCC<br>         :            <br>CCCA-ACTTG-TCTCAAAGTCGT        | 7.09E-2 |
| 89. bta-miR-2285bj<br>MIMAT0046391    | 21549                                      | -10.09                         | CCACTTACCCAGTTTGAGGGTTT<br>      :              <br>GGTTTTTCAAGTAAG-TCCCAAC        | 1.45E-1 |
| 90. bta-miR-382<br>MIMAT0009308       | 21586                                      | -11.60                         | AAGGTTTAC-AATTTCAACTTC<br>:  :  :              <br>GCTTAGGTGGTGCTTGTTGAAG          | 1.34E-1 |
| 91. bta-miR-2285dg<br>MIMAT0046736    | 22028                                      | -6.30                          | TGAAAAG--AAAGATGGTTTTT<br>        :            <br>GGTTTTCAAGTAAAGCCAAAAA          | 6.99E-2 |
| 92. bta-miR-2359<br>MIMAT0011897      | 22803                                      | -9.70                          | TTTATAATGGCTCTGCACAATC<br>:  :  :              <br>TTTTTCTTTTG--TTGTGTTAG          | 3.25E-1 |
| 93. bta-miR-2285e<br>MIMAT0024580     | 23833                                      | -10.37                         | AATGGTTACTACCCTACTTCAGGTTTC<br>:  :  :              <br>TAATCGGTTTTTCAAGCAAGTCCAAA | 2.86E-1 |
| 94. bta-miR-4657<br>MIMAT0036970      | 24050                                      | -12.00                         | GTGTGGTAGTACA--ACCACATA<br>   :  :              <br>TACGGAGTCTGGTGAAGGTGTAA        | 1.2E-1  |
| 95. bta-miR-2285aj-5p<br>MIMAT0040947 | 24683                                      | -10.10                         | GGGAACGTA--AGACCTTTTCA<br>:  :  :              <br>TTTTTGGGTTTGCTTGAAAAGT          | 2.18E-1 |
| 96. bta-miR-16b<br>MIMAT0003525       | 24763                                      | -14.40                         | AATAATATT--GATGCTGCTA<br>:                      <br>CGGTTATAAATGCACGACGAT          | 1.75E-1 |
| 97. bta-miR-374b<br>MIMAT0009302      | 24914                                      | -9.80                          | CAAGTTGTCAGTTGTATTATAA<br>                     <br>GTGAATCGTCCAACATAATATA          | 9.48E-2 |
| 98. bta-miR-16b<br>MIMAT0003525       | 24929                                      | -16.80                         | ATTATAATTTACCTGCTGCTA<br>                     <br>CGGTTATAAATGCACGACGAT            | 9.48E-2 |

| 1. miR Name                            | leftmost position of predicted target site | folding energy (in - Kcal/mol) | heteroduplex                                                                  | p value |
|----------------------------------------|--------------------------------------------|--------------------------------|-------------------------------------------------------------------------------|---------|
| 99. bta-miR-2349<br>MIMAT0011884       | 25263                                      | -16.20                         | TAAATCTACAGGGCCTTACAAGTGCCC<br>    : :       <br>ACTCAGA--CTCTGG--TCTTCACGGT  | 1.04E-1 |
| 100. bta-miR-1777a<br>MIMAT0012032     | 25272                                      | -25.00                         | AGGGCCTTACAAGTGCCCCCA<br>   :    :   <br>GGGCGGGGGGT-GGCGGGGGT                | 1.04E-1 |
| 101. bta-miR-2356<br>MIMAT0011893      | 25366                                      | -10.00                         | CCTTGACTTGC-CAACCACAAGC<br>   :           <br>GGAGTCTGAGGGAGT-AGTGTTCT        | 1.16E-1 |
| 102. bta-miR-2284h-5p<br>MIMAT0012019  | 25378                                      | -13.40                         | CAACCACAAGC--ATTTTGGG<br>       :   :       <br>TTTGG-GCTTGCTTGAAAACCC        | 1.16E-1 |
| 103. bta-miR-2285bc<br>MIMAT0046377    | 25628                                      | -8.50                          | CTAA--TGGTAATCTCTATGGTTTTA<br> :              <br>GGTTTTCCA-GTAAG--TCCAAAAA   | 2.65E-1 |
| 104. bta-miR-2285dg<br>MIMAT0046736    | 25628                                      | -7.90                          | CTAATGGTAATCTCTATGGTTTTA<br> :   :      :   <br>GGTTTTCA--AGTAAAGCCAAAAA      | 2.65E-1 |
| 105. bta-miR-2329-3p<br>MIMAT0011859   | 26137                                      | -13.90                         | GATTATGCAGCATGTAAATCACAGT<br>        :       <br>TGAATA-GTCG--AGTGTAGTGTCT    | 1.78E-1 |
| 106. bta-miR-496<br>MIMAT0009336       | 26185                                      | -8.30                          | GACAAATATTAATGCTATACTCA<br>         <br>CTCTAACC GG TACATTATGAGT              | 4.38E-2 |
| 107. bta-miR-2329-3p<br>MIMAT0011859   | 26187                                      | -14.10                         | CAATATTAATGCTATAC-TCACAGA<br>   :       :       <br>TGAATAGT--CGA-GTGTAGTGTCT | 4.38E-2 |
| 108. bta-miR-2356<br>MIMAT0011893      | 26973                                      | -7.90                          | AGTAAATTTAGTGAGCACAAGC<br> :  :        <br>GGAGTCTGAG-GGAGTAGTGTCT            | 3.43E-1 |
| 109. bta-miR-935<br>MIMAT0009385       | 27253                                      | -8.00                          | TACTACCCTGAACCCATAACTGG<br>           <br>CGCCATCGCCTTCGCCATTGACC             | 6.88E-2 |
| 110. bta-miR-2285ai-5p<br>MIMAT0040946 | 27326                                      | -9.50                          | CGGATGTAATGCTGAACATTTC<br> :        <br>TTTTTCGGTTCG-CTTGTA AAA               | 6.88E-2 |
| 111. my-mir-noheader-provided-48       | 27768                                      | -8.90                          | TACATCCCTTCAATCATGTGAAGCTA<br> :  :        <br>CCGTTCTGTCTCTGGTG--CTTCGAA     | 2.11E-1 |
| 112. bta-miR-382<br>MIMAT0009308       | 29044                                      | -10.60                         | TCAACCCAGAAACAAACAATTG<br>           <br>GCTTAGGT-GGTGCTTGTTGAAG              | 3.15E-2 |



| 1. miR Name                         | leftmost position of predicted target site | folding energy (in - Kcal/mol) | heteroduplex                                                                           | p value |
|-------------------------------------|--------------------------------------------|--------------------------------|----------------------------------------------------------------------------------------|---------|
| 113. bta-miR-2285bj<br>MIMAT0046391 | 29331                                      | -8.82                          | CCA-TCAACCCA-AAAGGGTTC<br>                                  <br>GGTTTTTCAAGTAAGTCCCAAC | 3.48E-1 |
| 114. bta-miR-362-5p<br>MIMAT0009298 | 29376                                      | -12.80                         | AATAATATCTAAACTTTAAGGATG<br> : :          : : <br>TGAGTGTGGATCCAAGGTTCTCTAA            | 3.85E-1 |
| 115. bta-let-7i MIMAT0003851        | 30051                                      | -18.90                         | TCTGGCAACAGAACCCCTACCTCT<br>:         :              <br>TTGTCGT--GTTTGATGATGGAGT      | 2.94E-1 |
| 116. bta-miR-12036<br>MIMAT0046731  | 30204                                      | -15.20                         | CCCCGC--CAGA--AGAGGAGCCC<br>  :                        <br>CAGGTGCCTGCTCAGTGCCTCGGC    | 5.91E-3 |
| 117. bta-miR-2451<br>MIMAT0012031   | 30715                                      | -14.30                         | CCTATACTGAAGA-CACCTCAG<br>: :                        <br>AGGTGAGAGGTCTCGTGGAGTA        | 2.39E-1 |
| 118. bta-miR-2349<br>MIMAT0011884   | 30928                                      | -13.60                         | GAAGT-AATTGCCGAACAAGTGCCC<br>           : :              <br>ACTCAGACTCTGGT--CTTCACGGT | 6.29E-2 |
| 119. bta-miR-2285l<br>MIMAT0024587  | 2210                                       | -10.50                         | CTGCTCTTGCATTTGCATGGGTTTT<br>                <br>CGGTTTTTCAAGTACG--CCCAAAA             | 2.61E-1 |
| 120. bta-miR-194b<br>MIMAT0046730   | 2954                                       | -11.40                         | AGAAAC--TTTCTCCATGTA<br>                <br>ACATTGTCGTTGAGGTACAC                       | 2.42E-1 |
| 121. bta-miR-2285cf<br>MIMAT0046663 | 5796                                       | -10.00                         | TAAAAATTTGAAACAAACTTTT<br>   : :              <br>CTTTTTTGGGCTT-GCTTGAAAC              | 2.39E-2 |
| 122. bta-miR-11997<br>MIMAT0046653  | 9640                                       | -13.70                         | TCTTACTGCAGACAGCTTGGTA<br>   :        :              <br>AGAGCCGGGTGTG-GGAACCAA        | 2.73E-1 |
| 123. bta-miR-2284i<br>MIMAT0011792  | 9962                                       | -5.04                          | AAATGGTTAATCCTACTTCTA<br>   :        :             <br>TTTGTGGTCTTGCTTGAAGAG           | 7.65E-2 |
| 124. bta-miR-194b<br>MIMAT0046730   | 9978                                       | -11.00                         | TTCTAAGGTAGAACCATGTA<br>: : :             <br>ACATTGTCGTTGAGGTACAC                     | 7.65E-2 |
| 125. bta-miR-208a<br>MIMAT0009261   | 10165                                      | -9.60                          | CTAAGCCTTACAGTGATGTCTTAT<br>            :        :   <br>TGTTTCG-AAAAACG-AGCAGAATA     | 3.56E-2 |
| 126. bta-miR-2284i<br>MIMAT0011792  | 11831                                      | -10.20                         | AAATACT--TGC-CACTTCTG<br>   : :        :              <br>TTTGTGGTCTTGCTTGAAGAG        | 6.2E-2  |

| 1. miR Name                          | leftmost position of predicted target site | folding energy (in - Kcal/mol) | heteroduplex                                                                        | p value |
|--------------------------------------|--------------------------------------------|--------------------------------|-------------------------------------------------------------------------------------|---------|
| 127. bta-miR-2285cy<br>MIMAT0046705  | 20278                                      | -8.70                          | ACCAGAAGATTATTGGTGGTTTG<br>  :       :          <br>GTTTTTTC AAGTAA - GACCAAAA      | 1.95E-1 |
| 128. bta-miR-2482<br>MIMAT0012074    | 21415                                      | -9.70                          | TTCTTGAAAAGGGTAAACTAC<br>:        : :      <br>TTTTGCTGTTTCT - TTTGATG              | 1.45E-1 |
| 129. bta-miR-2284i<br>MIMAT0011792   | 21589                                      | -9.20                          | GTTTACAATTTT - AACTTCTC<br>:           <br>TTTGTTGGTCTTGCTTGAAGAG                   | 1.34E-1 |
| 130. bta-miR-2285cy<br>MIMAT0046705  | 25627                                      | -6.90                          | TCTAATGGTAATCTCTATGGTTTT<br>:            <br>GTTTTTTC A - - AGTAAGACCAAAA           | 2.65E-1 |
| 131. bta-miR-2285cf<br>MIMAT0046663  | 25658                                      | -6.80                          | ACTTAAC - - AAACAGAACTTTT<br>             <br>CTTTTTGGGCTTG - CTTGAAAC              | 7.54E-2 |
| 132. bta-miR-2285cy<br>MIMAT0046705  | 27371                                      | -11.90                         | AGGAAGAGTTGGATCAATGGTTTA<br>: :    :     :         <br>GTTTTTTC AAGTAAG - - ACCAAAA | 1.61E-2 |
| 133. bta-miR-2285cf<br>MIMAT0046663  | 28049                                      | -7.10                          | GGTAGACCT - TAT - AACTTTA<br>  :   :     :   :      <br>CTTTTTGGGCTTGCTTGAAAC       | 2.5E-1  |
| 134. bta-miR-2464-3p<br>MIMAT0012052 | 28105                                      | -12.90                         | TAGTAATGGACA - - TCTGGAG<br>:                <br>GTCAAGACGAGTCGAGACCTC              | 3.03E-1 |
| 135. bta-miR-11997<br>MIMAT0046653   | 28227                                      | -13.60                         | AGAGTTCCTAGTCATGCTTGGTG<br>   :      :      <br>AGAGCCGGGT - - GTGGGAACCAA          | 2.65E-1 |
| 136. bta-miR-2285cf<br>MIMAT0046663  | 29372                                      | -6.16                          | GAGAAATAATATCTAAACTTTA<br>   :     :      <br>CTTTTTG - GGCTTGCTTGAAAC              | 3.85E-1 |
| 137. bta-miR-2284i<br>MIMAT0011792   | 29532                                      | -11.10                         | AAGCA - AACTGC - TACTTCTC<br>   :    :        <br>TTTGTTGGTCTTGCTTGAAGAG            | 7.91E-3 |
| 138. bta-miR-105b<br>MIMAT0009216    | 1723                                       | -6.49                          | GTAAGGAAACAAATCTCATTTGC<br>            <br>TGGTTCCT - - CAGACTCGTAAACT              | 3.11E-2 |
| 139. bta-miR-105b<br>MIMAT0009216    | 2205                                       | -7.90                          | TAGCACTGCTCT - TGCATTTGC<br>          <br>TGGTTCCTCAGACTCGTAAACT                    | 2.61E-1 |
| 140. bta-miR-2467-3p<br>MIMAT0012057 | 3449                                       | -23.60                         | TGGCAGTGATGCAGAACTGCCCTG<br>:                <br>GTCGGGACT - CG - GAGTGACGGGAG      | 1.22E-2 |

| 1. miR Name                         | leftmost position of predicted target site | folding energy (in - Kcal/mol) | heteroduplex                                                               | p value |
|-------------------------------------|--------------------------------------------|--------------------------------|----------------------------------------------------------------------------|---------|
| 141. bta-miR-545-3p<br>MIMAT0003807 | 3523                                       | -14.00                         | CAGTATAGTCAGTTGTTTGTGAT<br>   : : :       <br>GT-GTGTTA-TTTACAAACAATA      | 2.58E-1 |
| 142. bta-miR-12009<br>MIMAT0046677  | 3841                                       | -9.30                          | AGTGTGTACAAAGC-AGCTTGTG<br>       :       <br>TCAC-C-TCCCTTGAACGAACAA      | 1.11E-1 |
| 143. bta-miR-2341<br>MIMAT0011876   | 5118                                       | -13.80                         | TCAGAAGGAATTGCTTGCCTACTA<br>       : : : <br>AGTC-GGAAGAA-AGATGGATGAC      | 9.05E-2 |
| 144. bta-miR-2285de<br>MIMAT0046713 | 5795                                       | -11.50                         | TTAAAAATTTGAAACAAACTTTT<br>     : :       <br>TCTTTTGGACTTT-CTTGAAAA       | 2.39E-2 |
| 145. bta-miR-2285au<br>MIMAT0046346 | 5796                                       | -10.00                         | TAAAAATTTGAAACAAACTTTTA<br>    ::       <br>TCTTTTGGGCTT-GCTTGAAAAA        | 2.39E-2 |
| 146. bta-miR-20a<br>MIMAT0003527    | 6922                                       | -8.60                          | GCACAGTGGATTAAGAACAATTTT<br>       :  :       <br>GATG-GACGTGATATTCGTGAAAT | 2.28E-1 |
| 147. bta-miR-2285au<br>MIMAT0046346 | 6926                                       | -6.90                          | AGTGGATTAAGAAC--ACTTTTA<br>   : :            <br>TCTTTTG-GGCTTGCTTGAAAAA   | 2.28E-1 |
| 148. bta-miR-2285au<br>MIMAT0046346 | 7546                                       | -6.20                          | TATAAACCAGGTAATACTTTTA<br>     :       <br>TCTTTTGGGCTTGCTTGAAAAA          | 2.94E-1 |
| 149. bta-miR-9851<br>MIMAT0046371   | 8175                                       | -15.00                         | AAGTTGTAATAAATTTGGTGCCA<br>: :  : :       <br>GGTGGCG-GTCACGACCACGGT       | 3.62E-1 |
| 150. bta-miR-2285cv<br>MIMAT0046699 | 8734                                       | -5.30                          | GCTGTAGTAGACCAGGATTTTG<br>         <br>TTTTTTCAAGTAAACCTAAAAG              | 3.52E-1 |
| 151. bta-miR-2285au<br>MIMAT0046346 | 9692                                       | -7.00                          | AAATGGCTCTTAC-TACTTTTA<br>: :         <br>TCTTTTGGGCTTGCTTGAAAAA           | 1.98E-1 |
| 152. bta-miR-2341<br>MIMAT0011876   | 9900                                       | -15.40                         | TGTGCTTTACCAACCGCTACTG<br>  :         <br>AGTCGGAA-GAAAGATGGATGAC          | 1.42E-1 |
| 153. bta-miR-499<br>MIMAT0003536    | 10167                                      | -12.30                         | AAGCCTTACAGTGATGTCTTAT<br>  :   :         <br>TTTGTAGTGACGTT-CAGAATT       | 3.56E-2 |
| 154. bta-miR-33a<br>MIMAT0009294    | 10176                                      | -11.02                         | AGTGATGTCTTATCAAATGCAG<br>     :       <br>ACGTTACG-TTGATGTTACGTG          | 3.56E-2 |

| 1. miR Name                           | leftmost position of predicted target site | folding energy (in - Kcal/mol) | heteroduplex                                                              | p value |
|---------------------------------------|--------------------------------------------|--------------------------------|---------------------------------------------------------------------------|---------|
| 155. bta-miR-2285c<br>MIMAT0011950    | 10497                                      | -13.60                         | TCCTTATAAGGATGCTCAGGTTG<br>               <br>CGG-TTTTCAAACAAGTCCAAA      | 8.51E-2 |
| 156. bta-miR-376d<br>MIMAT0010199     | 10692                                      | -10.50                         | AGATGCTTTAGCTTCTATGAC<br>       :     <br>TACACCTAAAAGGAGATACTA           | 3.07E-1 |
| 157. bta-miR-33a<br>MIMAT0009294      | 12325                                      | -9.50                          | GGTTGTGTACCATTG-AATGCAA<br> : :  :   : :      <br>ACGTTACGT--TGATGTTACGTG | 9.78E-2 |
| 158. bta-miR-2341<br>MIMAT0011876     | 12633                                      | -13.84                         | TCGACTTGTAATACACCTACTC<br>      :       <br>AGTC-GGAAGAAAGATGGATGAC       | 2.18E-1 |
| 159. bta-miR-2399-3p<br>MIMAT0011955  | 12880                                      | -7.60                          | ACAATTTCTTCTACAGTTAGAT<br>              <br>TGTGAAAGACATCAACAATCTT        | 2.21E-1 |
| 160. bta-miR-499<br>MIMAT0003536      | 13216                                      | -12.40                         | AAAGATC-CTGT--GTCTTAT<br>           :      <br>TTTGTAGTGACGTTTCAAAATT     | 3.29E-1 |
| 161. bta-miR-105b<br>MIMAT0009216     | 13609                                      | -6.20                          | AACACGATTTCTTTACATTTGA<br>         <br>TGGTTCCTCAGACTCGTAAACT             | 2.73E-1 |
| 162. bta-miR-2341<br>MIMAT0011876     | 13765                                      | -8.97                          | CTGGTTGTGAACAATCCTACTT<br>:  :       <br>AGTCGGAAGAAAGATGGATGAC           | 1.32E-1 |
| 163. bta-miR-26a<br>MIMAT0003516      | 13922                                      | -5.90                          | AGGC-ATTTT--AACACTTGAT<br>       :       <br>TCGGATAGGACCTAATGAACTT       | 3.29E-1 |
| 164. bta-miR-2408<br>MIMAT0011966     | 15034                                      | -13.10                         | AAAGTATAGC-AGCTACACGTG<br>    :       <br>GGCCGACTCGAGTG-TGTGCAC          | 9.48E-2 |
| 165. bta-miR-10176-5p<br>MIMAT0040931 | 18311                                      | -24.40                         | GGCT-GTGGCTAAAGCTCCTCCT<br>: :              <br>TTGAACGTCTGA--GAGAGGAGGA  | 2.5E-1  |
| 166. bta-miR-376d<br>MIMAT0010199     | 18934                                      | -11.70                         | ATTTTGATTTTAAAGTTCTATGAT<br>      :     <br>TACACCTAAAA--GGAGATACTA       | 2.25E-1 |
| 167. bta-miR-12041<br>MIMAT0046737    | 20005                                      | -10.50                         | AGGGTCAGGATGT--CATCTTCAGC<br>      : :     <br>TAAGTCTCC-ACGTTCCGGAAGTCA  | 7.09E-2 |
| 168. bta-miR-20a<br>MIMAT0003527      | 21521                                      | -8.90                          | AGACAAGC-CTA--ATCACTTTA<br>               <br>GATGGACGTGATATTCGTGAAAT     | 1.45E-1 |

| 1. miR Name                           | leftmost position of predicted target site | folding energy (in - Kcal/mol) | heteroduplex                                                                      | p value |
|---------------------------------------|--------------------------------------------|--------------------------------|-----------------------------------------------------------------------------------|---------|
| 169. bta-miR-545-3p<br>MIMAT0003807   | 21679                                      | -8.20                          | AAGACTATAGA - - AGTGTGTGAT<br>          :          <br>GTGTGTTATTTACAAACAATA      | 2.25E-1 |
| 170. bta-miR-376d<br>MIMAT0010199     | 22099                                      | -7.10                          | CCACTGATAAGCTAGCTATGAT<br>        :          <br>TACACCTAAAAGG-AGATACTA           | 3.48E-1 |
| 171. bta-miR-1248<br>MIMAT0009972     | 22143                                      | -11.70                         | GTGGTGCGTAAAGAGCTAGAAGAAGGT<br>               <br>AAATCGTGTCACGAATATGTTCTTCCA     | 3.85E-1 |
| 172. bta-miR-124b<br>MIMAT0013774     | 22664                                      | -8.50                          | TTTACGCCTTATC - - ATGCCTTT<br>  :   :          <br>GAACCGTAAGTGGCGCACGGAAT        | 1.24E-1 |
| 173. bta-miR-33a<br>MIMAT0009294      | 22673                                      | -11.80                         | TATCATGCCTTTA - AATGCAC<br>        :          <br>ACGTTACGTTGATGTTACGTG           | 1.24E-1 |
| 174. bta-miR-12009<br>MIMAT0046677    | 23253                                      | -13.00                         | ACATGACGGCGGTTGCTTGTC<br>        :          <br>TCACCTCCCTTGAACGAACAA             | 1.89E-1 |
| 175. bta-miR-2285de<br>MIMAT0046713   | 25657                                      | -7.90                          | TACTTAAC - AAACAGAACTTTT<br>               <br>TCTTTTTGGACTTTCTTGAAAA             | 7.54E-2 |
| 176. bta-miR-10176-5p<br>MIMAT0040931 | 26567                                      | -20.40                         | CCTCTGCTAGTCTGTTTCCTCCT<br>            :          <br>TTGAACG - TC - GAGAGAGGAGGA | 3.46E-2 |
| 177. bta-miR-11978<br>MIMAT0046364    | 27359                                      | -11.80                         | TCC - - ATGATTTTAAGGAAGAGT<br>    :                <br>CGGCCGGCT - CCCTCCCTTCTCA  | 1.61E-2 |
| 178. bta-miR-2285de<br>MIMAT0046713   | 28048                                      | -8.60                          | AGGTAGACCT - - TATAACTTTA<br>  :   :            <br>TCTTTTTGGACTTTCTTGAAAA        | 2.5E-1  |
| 179. bta-miR-2285be<br>MIMAT0046380   | 29025                                      | -11.60                         | ACTGGAAGTT - GGTGGAGTTTC<br>: :                    <br>GGTTTTTCAAACGAGCTCAAAA     | 3.15E-2 |
| 180. bta-miR-2285de<br>MIMAT0046713   | 29371                                      | -6.16                          | TGAGAAATAATATCTAAACTTTA<br>    :     :          <br>TCTTTTTG - GACTTTCTTGAAAA     | 3.85E-1 |
| 181. bta-miR-11978<br>MIMAT0046364    | 29504                                      | -16.00                         | TCAAACC - AGGGGTAGAAGAGC<br>        :          <br>CGGCCGGCTCCCTCCCTTCTCA         | 7.91E-3 |
| 182. bta-miR-2285be<br>MIMAT0046380   | 29612                                      | -10.10                         | TCAAAAAG - - GAAAGGAGTTTG<br>:                    <br>GGTTTTTCAAACGAGCTCAAAA      | 8.64E-2 |

| 1. miR Name                          | leftmost position of predicted target site | folding energy (in - Kcal/mol) | heteroduplex                                                                   | p value |
|--------------------------------------|--------------------------------------------|--------------------------------|--------------------------------------------------------------------------------|---------|
| 183. bta-miR-33a<br>MIMAT0009294     | 30219                                      | -12.90                         | AGC--CCCAATAAACAAATGCAC<br>    :      <br>ACGTTACGTTG-ATGTTACGTG               | 5.91E-3 |
| 184. bta-miR-2368-3p<br>MIMAT0011912 | 30461                                      | -11.22                         | TGCA-ATTAGATTTGACAGT<br>    :      <br>CCGTCTCCACCAGACTGTCA                    | 3.29E-1 |
| 185. bta-miR-6501<br>MIMAT0046685    | 3451                                       | -19.60                         | GCAGT-GATGCAGAAACTGCCCTGT<br>:    :          <br>TGACAAATGGTGTC-CGACGGGACC     | 1.22E-2 |
| 186. bta-miR-500<br>MIMAT0009337     | 8730                                       | -12.10                         | TGTTGCTGTAGTAGACCAGGATTT<br>  :          <br>AGAGTGGGTCCATC-GTTCCTAAT          | 3.52E-1 |
| 187. bta-miR-2285az<br>MIMAT0046356  | 8733                                       | -8.60                          | TGCTGTAGTAGACCAGGATTTT<br>            <br>GGTTTTTCAAGTGAGCCTAAAA               | 3.52E-1 |
| 188. bta-miR-2285az<br>MIMAT0046356  | 10469                                      | -7.50                          | GTACTGATTTCAATGGGGATTTT<br>         <br>GGTTTTTCAAGT-GAGCCTAAAA                | 8.51E-2 |
| 189. bta-miR-500<br>MIMAT0009337     | 10523                                      | -12.20                         | AATTGCCC--GT--TCAGGATTA<br>              <br>AGAGTGGGTCCATCGTTCCTAAT           | 8.51E-2 |
| 190. bta-miR-500<br>MIMAT0009337     | 13086                                      | -12.80                         | TGCTACC--ACTAGTCAGGATTC<br>:         :      <br>AGAGTGGGTCCATCGTTCCTAAT        | 1.38E-1 |
| 191. bta-miR-181a<br>MIMAT0003543    | 14995                                      | -7.80                          | GTACTATGACTGGC--AGAATGTT<br>:         <br>TTGAGTGGCTGTGCGCAACTTACAA            | 9.48E-2 |
| 192. bta-miR-6501<br>MIMAT0046685    | 22521                                      | -16.90                         | ATATGGACCTTAATCCTGCCCTGT<br>         <br>TGACAAATGG-TGTCCGACGGGACC             | 3.66E-1 |
| 193. bta-miR-181a<br>MIMAT0003543    | 26995                                      | -7.80                          | GCTATGGAGAAGGTTAATGAATGTG<br>   :   :      <br>TTGAGTGGCTGTGCG-CAACTTACAA      | 1.75E-1 |
| 194. bta-miR-2373-3p<br>MIMAT0011919 | 232                                        | -22.70                         | GGTCTCGAACTAC--ACTGGGCTCC<br>       :    :      <br>CC-GAG-AAGGTGCACGCCCCGAGC  | 8.01E-2 |
| 195. bta-miR-2904<br>MIMAT0013862    | 237                                        | -15.80                         | CGAACTACACTG-GGCTCCA<br>  :    :      <br>CTCCGGT-TGGCTCCGAGGG                 | 8.01E-2 |
| 196. bta-miR-217<br>MIMAT0009267     | 409                                        | -11.80                         | AAACAA-GAGT-GTTGTGTGCAGTC<br>        :    :      <br>TAGGTTAGTCAAGGAC-TACGTCAT | 1.45E-1 |

| 1. miR Name                          | leftmost position of predicted target site | folding energy (in - Kcal/mol) | heteroduplex                                                                | p value |
|--------------------------------------|--------------------------------------------|--------------------------------|-----------------------------------------------------------------------------|---------|
| 197. bta-miR-217<br>MIMAT0009267     | 487                                        | -9.50                          | CTTCAA--GATGCTT--TGCAGTC<br> :      :         <br>TAGGTTAGTCAAGGACTACGTCAT  | 3.03E-1 |
| 198. bta-miR-2442<br>MIMAT0012017    | 2196                                       | -16.40                         | TTTTACTACTAGC- ACTGCTCT<br>:               <br>ACGTCGGGTGTCGGGGACGAGA       | 2.61E-1 |
| 199. bta-miR-1434-5p<br>MIMAT0012039 | 2952                                       | -7.70                          | AGAGA-AACTTTCTCCATGTAA<br>      :             <br>TCTTTAAAAATCAGTAGTACATG   | 2.42E-1 |
| 200. bta-miR-2352<br>MIMAT0011888    | 3517                                       | -9.56                          | AAGCAA-C-AGTATAGTCAGTTG<br>                   <br>GTCGTTAGGACAAGAAAGTCAAA   | 2.58E-1 |
| 201. bta-miR-217<br>MIMAT0009267     | 4139                                       | -9.20                          | TTGCAA--AG--GCTATTGCAGTA<br>                   <br>TAGGTTAGTCAAGGACTACGTCAT | 1.02E-1 |
| 202. bta-miR-2285dm<br>MIMAT0046758  | 6055                                       | -12.80                         | TATAAGGTTACTGAGTGGCCAA<br>               <br>TTTTATGTCTGA-AAACCGGTT         | 4.26E-2 |
| 203. bta-miR-3602<br>MIMAT0016937    | 6062                                       | -13.40                         | TTACTG-AGTGG--CCAACAG<br>      :      :         <br>AATGGCGCCACTAGGGTTGTG   | 4.26E-2 |
| 204. bta-miR-1284<br>MIMAT0009955    | 8252                                       | -13.40                         | ATTCTGCTAAG-CATGTGCAGG<br>    :               <br>CTTTTCGGTCCCAGACACGTCT    | 3.07E-1 |
| 205. bta-miR-2444<br>MIMAT0012021    | 8535                                       | -5.80                          | GCCCACTTACACAGTACACAAA<br>               <br>TTTTGTTTTTTTGT--TGTGTTT        | 5.51E-2 |
| 206. bta-miR-106b<br>MIMAT0009218    | 8798                                       | -11.80                         | GTTACCATGTGTT-GCACTTTA<br>    :      :           <br>TAGACGTG-ACAGTCGTGAAAT | 1.54E-1 |
| 207. bta-miR-1284<br>MIMAT0009955    | 8831                                       | -10.90                         | TTTCTGCTGATGG--AGTGCAGT<br>    :               <br>CTTTTCGG-TCCCAGACACGTCT  | 1.54E-1 |
| 208. bta-miR-3533<br>MIMAT0036975    | 9922                                       | -13.40                         | GCTTCCGTTTCA-ACTTCAT<br>      :               <br>TACAGGTGCAGTGTGAAGTA      | 7.65E-2 |
| 209. bta-miR-1603<br>MIMAT0011823    | 10295                                      | -13.20                         | CTGCTTATAACGGCAAACCAC<br>:  :    :             <br>TTTTTTGTGTT-TTGTGTTGGTG  | 3.62E-1 |
| 210. bta-miR-222<br>MIMAT0003530     | 10548                                      | -8.02                          | ATCT-GT-TAATTTTGTAGCA<br>  :  :             <br>TGGGTCATCGGTCTACATCGA       | 8.51E-2 |

| 1. miR Name                          | leftmost position of predicted target site | folding energy (in - Kcal/mol) | heteroduplex                                                                     | p value |
|--------------------------------------|--------------------------------------------|--------------------------------|----------------------------------------------------------------------------------|---------|
| 211. bta-miR-1284<br>MIMAT0009955    | 16070                                      | -8.13                          | GAACATGTATTTAAGAAGTGCAGT<br>    :      <br>CTT-TTCG-GTCCCAGACACGTCT              | 3.52E-1 |
| 212. bta-miR-2371<br>MIMAT0011916    | 16884                                      | -7.10                          | CAGAACAATGTTGTGAACATATC<br> :     : :      <br>TTTTTGGTGTG- - TTTTGATAT          | 2.82E-1 |
| 213. bta-miR-2442<br>MIMAT0012017    | 17285                                      | -13.10                         | TGTTTATATTGGTGATCCTGCTCA<br>:   : :      <br>ACGTCGGGTGTCG- - GGGACGAGA          | 3.52E-1 |
| 214. bta-miR-2405<br>MIMAT0011963    | 19156                                      | -12.80                         | ACAAACATGCATTCCACACT<br>   :         <br>CTCCGGTTTGTGTTGGTGTGT                   | 3.16E-1 |
| 215. bta-miR-411a<br>MIMAT0009312    | 19381                                      | -7.80                          | CTTAC- - AATACAG-CTACTAC<br>                <br>GCATGCGATATGCCAGATGATA           | 3.12E-1 |
| 216. bta-miR-2352<br>MIMAT0011888    | 20519                                      | -7.10                          | TGTTGATTTTAAAGATTTTCAGTTC<br>:    :   :      <br>GTCGTTAGGA- - CAAGAAAGTCAAA     | 3.16E-1 |
| 217. bta-miR-106b<br>MIMAT0009218    | 21523                                      | -5.90                          | ACAAGC-CT- - AATCACTTTA<br>          <br>TAGACGTGACAGTCGTGAAAT                   | 1.45E-1 |
| 218. bta-miR-106b<br>MIMAT0009218    | 22584                                      | -7.30                          | TTTTTAGGAGTTTTCACCTTTA<br>   :      <br>TAGACGTGACAGTCGTGAAAT                    | 3.43E-1 |
| 219. bta-miR-375<br>MIMAT0009303     | 22618                                      | -12.70                         | TTACAC-AGGCGAAGGTCAACAAAT<br> :                  <br>AGTGCGCTCGGCTTGC- - TTGTTTT | 1.86E-1 |
| 220. bta-miR-3533<br>MIMAT0036975    | 23837                                      | -7.70                          | GTTACTAC- - CCTACTTCAG<br> :    :      <br>TACAGGTGCAGTGTGAAGTA                  | 2.86E-1 |
| 221. bta-miR-2371<br>MIMAT0011916    | 24798                                      | -9.60                          | TTTTTCCA-GCATAACTATA<br>    :         <br>TTTTTGGTGTGTTTGTATAT                   | 3.85E-1 |
| 222. bta-miR-217<br>MIMAT0009267     | 24861                                      | -12.90                         | GGGCAATTGGGCTATTTGCAGTC<br>     :   :      <br>TAGGTTAGTCAAGGACTACGTCAT          | 2.32E-1 |
| 223. bta-miR-1434-5p<br>MIMAT0012039 | 26132                                      | -5.50                          | GTGGTGATTATGCAGCATGTAA<br>            <br>TCTTTAAAATCAGTAGTACATG                 | 1.78E-1 |
| 224. bta-miR-1284<br>MIMAT0009955    | 26969                                      | -9.30                          | CACTAGTAAAAATTTAGTGCAGC<br>   :   :      <br>CTTTTCGGTCCCAGACACGTCT              | 3.43E-1 |



| 1. miR Name                           | leftmost position of predicted target site | folding energy (in - Kcal/mol) | heteroduplex                                                           | p value |
|---------------------------------------|--------------------------------------------|--------------------------------|------------------------------------------------------------------------|---------|
| 225. bta-miR-1603<br>MIMAT0011823     | 28633                                      | -10.10                         | TTTACACGATGTAAAACCAC<br>     :       <br>TTTTTGT-GTT-TTGTTTGGTG        | 1.78E-1 |
| 226. bta-miR-2442<br>MIMAT0012017     | 29961                                      | -16.50                         | GAAGGCTCA-GGAAGGTCTGCTCC<br>: :   :  :   <br>ACGTCGGGTGTC--GGGGACGAGA  | 2.01E-1 |
| 227. bta-miR-3533<br>MIMAT0036975     | 29985                                      | -12.30                         | AATTCCAGATC-TACTTCAC<br>       :     <br>TACAGGTGCAGTGTGAAGTA          | 2.01E-1 |
| 228. bta-miR-2378<br>MIMAT0011924     | 30301                                      | -15.20                         | AACTTGGAAGTAGTGACCCACA<br>       :       <br>GGGAAC-GAGTCTGTTGGGTGT    | 4.98E-2 |
| 229. bta-miR-2285dm<br>MIMAT0046758   | 30376                                      | -13.40                         | CAAGATTAGA--GTTGGCCAA<br>:         <br>TTTTATGTCTGAAAACCGGTT           | 1.09E-1 |
| 230. bta-miR-1284<br>MIMAT0009955     | 30381                                      | -16.70                         | TTAGAGTTGGCCAAAGTGCAGA<br> :   :       <br>CTTTTCGGTCCCAGACACGTCT      | 1.09E-1 |
| 231. bta-miR-1603<br>MIMAT0011823     | 30555                                      | -12.10                         | ATGAATATGAGTCCAAAACCAC<br>: :   :  :   <br>TTTTTGTGTTT--TGTTTGGTG      | 3.66E-2 |
| 232. bta-miR-12055<br>MIMAT0046762    | 266                                        | -18.90                         | GGATGTTTGAGGACGCAGAGGAGAA<br>:           <br>TCAAGAGGCTCC--CG-CTCCTCTT | 3.03E-1 |
| 233. bta-miR-2354<br>MIMAT0011890     | 5122                                       | -12.50                         | AAGGAATTGC-TTGCCTACTA<br>:   :   :       <br>TGATTTGTTGTGTTGGATGAT     | 9.05E-2 |
| 234. bta-miR-10163-3p<br>MIMAT0040910 | 5862                                       | -13.10                         | TGAGTATAAACC-TGACTTGTCA<br>           <br>TCTCTCTCTTGGTAC-GAACAGT      | 6.48E-2 |
| 235. bta-miR-671<br>MIMAT0009365      | 6168                                       | -14.39                         | GTTAAGCCATGAGCAAGCTTCCC<br>           <br>GAGGTCGGGGAGGTCCCGAAGGA      | 3.34E-1 |
| 236. bta-miR-671<br>MIMAT0009365      | 8555                                       | -14.70                         | AATCAG-ATTTTCA--GCTTCCC<br>:    :  :       <br>GAGGTCGGGGAGGTCCCGAAGGA | 5.51E-2 |
| 237. bta-miR-2304<br>MIMAT0011816     | 8939                                       | -10.80                         | CCGATGGTAGTC-CACAACC<br>:         <br>TGTGTGTGTTGGTGTGTTGG             | 3.62E-1 |
| 238. bta-miR-3596<br>MIMAT0016940     | 9405                                       | -13.00                         | TGTTAATGTG-ATTGTGTGGTG<br>    :       <br>ACTCCATCATCCAACACACCAA       | 1.92E-1 |

| 1. miR Name                           | leftmost position of predicted target site | folding energy (in - Kcal/mol) | heteroduplex                                                                    | p value |
|---------------------------------------|--------------------------------------------|--------------------------------|---------------------------------------------------------------------------------|---------|
| 239. bta-miR-2354<br>MIMAT0011890     | 9959                                       | -8.70                          | TGAAAATGGTTAATCCTACTT<br>   : :      <br>TGATTGTGTGTTGGATGAT                    | 7.65E-2 |
| 240. bta-miR-2354<br>MIMAT0011890     | 12637                                      | -14.20                         | ACT-TGTAATACA-CCTACTC<br>    :   :          <br>TGATTGTGTGTTGGATGAT             | 2.18E-1 |
| 241. bta-miR-2354<br>MIMAT0011890     | 13764                                      | -12.90                         | GCTGGTTGTGAACAATCCTACTT<br>:   : :           <br>TGATT-TGTTGTGTT-GGATGAT        | 1.32E-1 |
| 242. bta-miR-3596<br>MIMAT0016940     | 13988                                      | -11.60                         | TGCAGCCCCAGG--GTGTGGTG<br>         <br>ACTCCATCATCCAACACACCAA                   | 3.48E-1 |
| 243. bta-miR-2354<br>MIMAT0011890     | 19606                                      | -18.10                         | ATAATACAACATATCCTACTA<br>       :        <br>TGATTGTGTGTTGGATGAT                | 5.58E-3 |
| 244. bta-miR-664a<br>MIMAT0012078     | 20024                                      | -17.70                         | CAGCCA-ATTCG--ACAGCCTG<br>    :      <br>GTAGGTGTGTGTGGGGTCGGAC                 | 7.09E-2 |
| 245. bta-miR-664a<br>MIMAT0012078     | 21655                                      | -14.70                         | TTGCTATGCTGGATATTCAGCCTG<br>:  ::   : :      <br>GTAGGTGTG--TGTGGGGTCGGAC       | 2.25E-1 |
| 246. bta-miR-10163-3p<br>MIMAT0040910 | 23252                                      | -15.50                         | AACATGACGGCGGTTGCTTGTC<br>   :   :      <br>TCTCTCTCTTGGTA-CGAACAGT             | 1.89E-1 |
| 247. bta-miR-2354<br>MIMAT0011890     | 23829                                      | -10.00                         | GCTTAATGGTTACTACCCTACTT<br>:      : :         <br>TGATTGTGTTG-TG-TTGGATGAT      | 2.86E-1 |
| 248. bta-miR-664a<br>MIMAT0012078     | 24709                                      | -12.10                         | AATTTTAATATG-AGCAGCCTG<br>  : : :      <br>GTAGGTGTGTGTGGGGTCGGAC               | 1.75E-1 |
| 249. bta-miR-2365<br>MIMAT0011903     | 27376                                      | -5.70                          | GAGTTGGATCAATGGTTTAAAAACC<br>   :      :   :      <br>CT-ATTCT--TTGTCG--TTTTTGA | 1.61E-2 |
| 250. bta-miR-137<br>MIMAT0009231      | 27473                                      | -7.94                          | ATAGGT--TACAGGAGGCAATAA<br>     : :      <br>GATGCGCATAAGAATTCGTTATT            | 2.14E-1 |
| 251. bta-miR-12024<br>MIMAT0046717    | 29969                                      | -6.80                          | AGGAAGGTCTG-CTCCTAAT<br>              <br>TCACAACAAACCTAGGATTT                  | 2.01E-1 |
| 252. bta-miR-1584-5p<br>MIMAT0011969  | 30207                                      | -20.50                         | CGCCAGAAGAGGAGCCCCAA<br>            <br>ACGGGGGTCGGGTCGGGGTT                    | 5.91E-3 |

| 1. miR Name                        | leftmost position of predicted target site | folding energy (in - Kcal/mol) | heteroduplex                                                               | p value |
|------------------------------------|--------------------------------------------|--------------------------------|----------------------------------------------------------------------------|---------|
| 253. bta-miR-12055<br>MIMAT0046762 | 30589                                      | -10.40                         | GTCAGAAGAATGGACAAGGAGAA<br>          <br>TCAAGAGGCTCCC-GCTCCTCTT           | 4.57E-2 |
| 254. bta-miR-664a<br>MIMAT0012078  | 30673                                      | -15.80                         | TGACTGCAGAGGACATCAGCCTT<br>     :         <br>GTAGGTGT-GTGTGGGGTCCGAC      | 1.28E-1 |
| 255. bta-miR-29b<br>MIMAT0003828   | 2237                                       | -13.90                         | TTCAT--GTTTTGCATGGTGCTT<br>  : :   :      <br>TTGTGACTAAAGTTTACCACGAT      | 2.61E-1 |
| 256. bta-miR-502b<br>MIMAT0009339  | 2649                                       | -11.40                         | TAAAAATTTGC-ATTGTGGATA<br>:           <br>CTTAGGAACGGGTCCACCTAA            | 2.78E-1 |
| 257. bta-miR-502b<br>MIMAT0009339  | 2893                                       | -7.30                          | GAAGTGGATGATAC-TGTGGATA<br>              <br>CTT-AGGAAC-GGGTCCACCTAA       | 1.36E-1 |
| 258. bta-miR-539<br>MIMAT0009342   | 2943                                       | -10.60                         | TGCCATAGAAGAGAAACTTTCTCC<br>  :               <br>TGTGTG-GTTC-CTATTAAAGAGG | 2.42E-1 |
| 259. bta-miR-502b<br>MIMAT0009339  | 3852                                       | -12.40                         | AGCAGCTTGTGT-TGTGGATG<br>   : :      <br>CTTAGGAACGGGTCCACCTAA             | 1.11E-1 |
| 260. bta-miR-2285w<br>MIMAT0029945 | 4815                                       | -7.00                          | CAGCCAGGATAAAGTTTTTGGT<br> :       :      <br>TTTAGACTTACTT-GAAAACCA       | 3.16E-1 |
| 261. bta-miR-2285w<br>MIMAT0029945 | 5494                                       | -9.20                          | GACGCTGTTATG-CATTTTGGT<br>              <br>TTTAGAC-TTACTTGAAAACCA         | 2.86E-1 |
| 262. bta-miR-2404<br>MIMAT0011961  | 5647                                       | -11.10                         | AAGGGTGTAG-GAAGTGCAA<br>:  : : :      <br>CGTCTATGGTACGTCACGTT             | 9.48E-2 |
| 263. bta-miR-2284u<br>MIMAT0011895 | 5795                                       | -6.60                          | TTAAAAATTTGAAACAAACTTTT<br>     : :           <br>TCTTTTGG-CTT-GCTTGAAAA   | 2.39E-2 |
| 264. bta-miR-2285w<br>MIMAT0029945 | 6134                                       | -10.00                         | GGGGTTG-TATTACTTTTGGT<br>:         <br>TTTAGACTTACTTGAAAACCA               | 2.14E-1 |
| 265. bta-miR-29b<br>MIMAT0003828   | 6786                                       | -13.00                         | GAGTGTGGTTGCTAGA-GGTGCTT<br>  :    :  :      <br>TTGTGACTAA-AGTTTACCACGAT  | 3.52E-1 |
| 266. bta-miR-502b<br>MIMAT0009339  | 9268                                       | -12.90                         | TTAGCACAGCCT--GTGGATT<br>   :      <br>CTTAGGAACGGGTCCACCTAA               | 2.28E-1 |

| 1. miR Name                           | leftmost position of predicted target site | folding energy (in - Kcal/mol) | heteroduplex                                                                               | p value |
|---------------------------------------|--------------------------------------------|--------------------------------|--------------------------------------------------------------------------------------------|---------|
| 267. bta-miR-29b<br>MIMAT0003828      | 9298                                       | -13.90                         | ACTGCTAGTTCATTGCTGGTGCTA<br>:    :                     <br>TTGTGACTAAAGT - - TTACCACGAT    | 2.28E-1 |
| 268. bta-miR-2285w<br>MIMAT0029945    | 9325                                       | -7.70                          | CTTGCTGTAATTGTTGTTTGGT<br>                     <br>TTTAGAC - - TTACTTGAAAACCA              | 2.28E-1 |
| 269. bta-miR-33b<br>MIMAT0009295      | 10177                                      | -11.60                         | GTGATGTCTTATCAAATGCAG<br>      : :              <br>CGTTACGTTGT - CGTTACGTG                | 3.56E-2 |
| 270. bta-miR-497<br>MIMAT0004343      | 10561                                      | -12.10                         | GTAGCATGGCTTTATGCTGCTA<br>  : :                 <br>ATGTTTGGTGT CACACGACGAC                | 8.51E-2 |
| 271. bta-miR-106a<br>MIMAT0003784     | 11803                                      | -13.40                         | TGGCAATATTGTA - GCACTTTG<br>: :                     <br>ATGGACGTGACATT CGTGAAAA            | 6.2E-2  |
| 272. bta-miR-33b<br>MIMAT0009295      | 12326                                      | -10.10                         | GTTGTGTACCATTGAATGCAA<br>  : :    :                 <br>CGTTACGTTGT - CGTTACGTG            | 9.78E-2 |
| 273. bta-miR-2285w<br>MIMAT0029945    | 13958                                      | -7.00                          | TAAATGGTATGA - - TTTTGGT<br>                       <br>TTTAGACTTACTTGAAAACCA               | 3.48E-1 |
| 274. bta-miR-497<br>MIMAT0004343      | 14412                                      | -15.80                         | GACTTGCTTTTATATGCTGCTG<br>   :   :                  <br>ATGTTTGGTGT CACACGACGAC            | 7.54E-2 |
| 275. bta-miR-11986<br>MIMAT0046385    | 14680                                      | -8.70                          | ATTTGCCAC - CATGGTGACAT<br>:                       <br>TTCCTGATTGAGTA - - ACCTGTT          | 1.98E-2 |
| 276. bta-miR-10169-3p<br>MIMAT0040917 | 16152                                      | -11.56                         | AGTTGCAT - CAGAAAGCCTCTTCT<br>:    :                  <br>TACTTGTGCAAGACGAGGAGAAGT         | 5.43E-2 |
| 277. bta-miR-1301<br>MIMAT0009958     | 16161                                      | -13.70                         | AGAAAGCCTCTT - CTTTGCTGCAA<br>    :                    <br>CTTTAGTGAGGATCCGTCGACGTT        | 5.43E-2 |
| 278. bta-miR-1298<br>MIMAT0009970     | 17472                                      | -9.00                          | AATAAGCTTAAGCTAAGAATGAA<br>:    :                  <br>ATGTAGACCTGTCGG - - CTTACTT         | 3.66E-1 |
| 279. bta-miR-12052<br>MIMAT0046759    | 18190                                      | -10.90                         | ATGCCACGCGTGATAGCATTGGG<br>:                        <br>AGAGTCAAACCTTTAGAGTAACCC           | 2.5E-1  |
| 280. bta-miR-1301<br>MIMAT0009958     | 20578                                      | -16.40                         | TCTATC - TTCGTTTGCAAGCTGCAT<br>    :                       <br>CTTTAGTGAGGATCCGT - CGACGTT | 2.42E-1 |

| 1. miR Name                            | leftmost position of predicted target site | folding energy (in - Kcal/mol) | heteroduplex                                                                       | p value |
|----------------------------------------|--------------------------------------------|--------------------------------|------------------------------------------------------------------------------------|---------|
| 281. bta-miR-33b<br>MIMAT0009295       | 21108                                      | -7.30                          | ACAGAGTTTCTTGAATGCAG<br>  :  :          <br>CGTTACG-TTG-TCGTTACGTG                 | 3.16E-1 |
| 282. bta-miR-11986<br>MIMAT0046385     | 21872                                      | -14.20                         | CAGGA--AATGGATTGGACAT<br>      :      <br>TTCCTGATTGAGTAACCTGTT                    | 2.65E-1 |
| 283. bta-miR-1298<br>MIMAT0009970      | 22168                                      | -5.94                          | GTGATCT--TCCCGAGAATGAT<br>            <br>ATGTAGACCTGTCGGCTTACTT                   | 3.85E-1 |
| 284. bta-miR-33b<br>MIMAT0009295       | 22674                                      | -11.10                         | ATCATGC-CTTTAAATGCAC<br>            <br>CGTTACGTTGTCGTTACGTG                       | 1.24E-1 |
| 285. bta-miR-2475<br>MIMAT0012066      | 22677                                      | -11.23                         | ATGCCTTTAAATGCAC-CACTTCT<br>:           <br>GGCG-ACGTCAAAGTGTGTGAAGT               | 1.24E-1 |
| 286. bta-miR-2285al-5p<br>MIMAT0040949 | 22947                                      | -7.30                          | AGTATATCGTAC-CACTTTGT<br>:           <br>ATTTTGGGCTTGTTTGAAACA                     | 2.39E-1 |
| 287. bta-miR-6529a<br>MIMAT0025565     | 25625                                      | -6.09                          | ATTCT--AATGGTAATCTCTA<br> :           <br>TGAGACGCGGAGACTAGAGAG                    | 2.65E-1 |
| 288. bta-miR-2284u<br>MIMAT0011895     | 25657                                      | -8.00                          | TACTTAACAAACAGAACTTTT<br>          <br>TCTTTTGGCTTGCTTGAAAA                        | 7.54E-2 |
| 289. bta-miR-10178-5p<br>MIMAT0040933  | 27467                                      | -20.40                         | AAATG-AATAGGTTACAGGAGG<br>   :           <br>ACGACGGAGTCCAGGGTCCTCC                | 2.14E-1 |
| 290. bta-miR-10178-5p<br>MIMAT0040933  | 27681                                      | -13.69                         | TGATTATACTGGACACCAGGAGT<br>            <br>ACGACGGAGTCC-AGGGTCCTCC                 | 2.21E-1 |
| 291. bta-miR-2284u<br>MIMAT0011895     | 28048                                      | -8.60                          | AGGTAGACCTTAT-AACTTTA<br>  :  :       :      <br>TCTTTTGGCTTGCTTGAAAA              | 2.5E-1  |
| 292. bta-miR-2284u<br>MIMAT0011895     | 29371                                      | -5.74                          | TGAGAAATAATATCTAAACTTTA<br>  :     :      <br>TCTTTTGG--GCTTGCTTGAAAA              | 3.85E-1 |
| 293. bta-miR-10178-5p<br>MIMAT0040933  | 29540                                      | -19.30                         | TGCTACTTCTCAGCTACCATCAGGAGG<br>     :              <br>ACGA--CGGAGTC-CAGG--GTCCTCC | 7.91E-3 |
| 294. bta-miR-196a<br>MIMAT0009255      | 30051                                      | -18.90                         | TCTGGCAACA-GAACCCCTACCTC<br>:   :                <br>GGGTTGTTGTACTT--TGATGGAT      | 2.94E-1 |

| 1. miR Name                           | leftmost position of predicted target site | folding energy (in - Kcal/mol) | heteroduplex                                                                         | p value |
|---------------------------------------|--------------------------------------------|--------------------------------|--------------------------------------------------------------------------------------|---------|
| 295. bta-miR-33b<br>MIMAT0009295      | 30220                                      | -12.50                         | GC--CCCAATAAACAATGCAC<br>             :          <br>CGTTACGTTGT-CGTTACGTG           | 5.91E-3 |
| 296. bta-miR-106a<br>MIMAT0003784     | 30469                                      | -7.60                          | GATTTG-ACAGTA--CACTTTC<br> ::                  <br>ATGGACGTGACATTCGTGAAAA            | 3.29E-1 |
| 297. bta-miR-411c-5p<br>MIMAT0025545  | 206                                        | -9.60                          | TCACAATGT-CGAAGATCAACA<br>                 <br>TTACATACAAGAGACTAGTTGG                | 8.01E-2 |
| 298. bta-miR-10179-5p<br>MIMAT0040937 | 1123                                       | -13.40                         | CGTTATGTTATGAGACTGCAGA<br>:   :           <br>GGTGTCGGATGTTGGGACGTCT                 | 1.69E-1 |
| 299. bta-miR-2285a<br>MIMAT0011797    | 3429                                       | -9.10                          | TTGCTGTTGCGATCAGTTTTG<br> :      <br>GGTTCTTAAAGTAAGTCAAAAA                          | 1.22E-2 |
| 300. bta-miR-2449<br>MIMAT0012027     | 3454                                       | -15.20                         | GTGATGC-AGAACTGCCCT<br> :                    <br>CGGGACGACAGAGGACGGGT                | 1.22E-2 |
| 301. bta-miR-299<br>MIMAT0009274      | 6138                                       | -14.20                         | TTGTATTACTTTTGGTAAACCT<br>                :      <br>TACATACACCCTGCCATTTGGT          | 2.14E-1 |
| 302. bta-miR-142-5p<br>MIMAT0003790   | 8803                                       | -8.00                          | CATGTGTT--GCACTTTATT<br>   :          <br>CATCACGAAAGATGAAATAC                       | 1.54E-1 |
| 303. bta-miR-130a<br>MIMAT0009223     | 8809                                       | -13.50                         | TTGCACTTTATTACACATGCACTT<br>                         <br>TACGGGAAA-ATTGT-AACGTGAC    | 1.54E-1 |
| 304. bta-miR-454<br>MIMAT0009326      | 8813                                       | -10.00                         | ACTTTAT-TACA--CATGCACTT<br>  : :                   <br>TGGGATATTCGTTATAACGTGAT       | 1.54E-1 |
| 305. bta-miR-130a<br>MIMAT0009223     | 8905                                       | -15.00                         | GTGCTTTCCTCTGC-TTGCACTA<br>:    : :          :           <br>TACGGGA-AAATTGTAACGTGAC | 2.69E-1 |
| 306. bta-miR-142-5p<br>MIMAT0003790   | 9497                                       | -5.20                          | TTTATGC--CACGCTTTATT<br>           :      <br>CATCACGAAAGATGAAATAC                   | 3.48E-1 |
| 307. bta-miR-2287<br>MIMAT0011794     | 10048                                      | -16.30                         | GATAAGGTCTACT-GTCCAG<br> :   :      <br>TTCACGACGGTGGTCAGGGTC                        | 1.75E-1 |
| 308. bta-miR-107<br>MIMAT0003785      | 10560                                      | -18.50                         | TGTAGC-ATG-GCTTTATGCTGCT<br>:          :           <br>CTATCGGGACATG--TTACGACGA      | 8.51E-2 |

| 1. miR Name                          | leftmost position of predicted target site | folding energy (in - Kcal/mol) | heteroduplex                                                                | p value |
|--------------------------------------|--------------------------------------------|--------------------------------|-----------------------------------------------------------------------------|---------|
| 309. bta-miR-411c-5p<br>MIMAT0025545 | 12065                                      | -12.70                         | CTAGTG-GTTCTGCTAATCAACA<br>  :               <br>TTACATACAAGA-GACTAGTTGG    | 3.46E-2 |
| 310. bta-miR-2488<br>MIMAT0012084    | 12067                                      | -7.26                          | AGTGGTTCTGCTAATCAACAG<br>           <br>TCTCC-CTTATCCTAGTTGTA               | 3.46E-2 |
| 311. bta-miR-129-5p<br>MIMAT0009221  | 12714                                      | -5.50                          | TGATGGTCTTAAGTATACAAAAAT<br>:  :         <br>TCGTTCCGGG--TCTGGCGTTTTTC      | 3.34E-1 |
| 312. bta-miR-107<br>MIMAT0003785     | 14412                                      | -15.40                         | GACTTGCTTT-TATA-TGCTGCT<br>     :    :       <br>CT-ATCGGGACATGTTACGACGA    | 7.54E-2 |
| 313. bta-miR-133c<br>MIMAT0029949    | 15916                                      | -6.00                          | ACCACGAAAATGAAGAATACCAAAA<br>              <br>CGACCATTTTAC--CT--TGGTTTA    | 2.69E-2 |
| 314. bta-miR-485<br>MIMAT0009328     | 16150                                      | -16.50                         | GCAGTTGCATCA--GAAAGCCTCT<br> :                 <br>GCTTAA-GTAGTGCCGGTCGGAGA | 5.43E-2 |
| 315. bta-miR-107<br>MIMAT0003785     | 16162                                      | -17.80                         | GAAAGCCT-CTTCTTTGCTGCA<br>       :        <br>CTATCGGGACATGTTACGACGA        | 5.43E-2 |
| 316. bta-miR-133c<br>MIMAT0029949    | 16264                                      | -11.60                         | GTGATGTAAATGATGTTACCAAAT<br> :       :         <br>CG-ACCATT--TTACCTTGGTTTA | 1.36E-1 |
| 317. bta-miR-411c-5p<br>MIMAT0025545 | 16890                                      | -9.80                          | AATGT-TGTGAACT-ATCAACA<br>               <br>TTACATACAAGAGACTAGTTGG         | 2.82E-1 |
| 318. bta-miR-3065<br>MIMAT0046741    | 18240                                      | -16.10                         | TCCA-CAGGAATTGATTTTGTGT<br>               <br>AGGTCGT-AGTCACTAAAACAACT      | 2.14E-1 |
| 319. bta-miR-152<br>MIMAT0009238     | 20418                                      | -12.80                         | AGTAAG-AGTGTT-TGCACTGT<br>:        :      <br>GGGTTCAAGACAGTACGTGACT        | 2.21E-1 |
| 320. bta-miR-411c-5p<br>MIMAT0025545 | 21967                                      | -9.00                          | ATTATAAAATCACT-ATCAACC<br>          <br>TTACATACAAGAGACTAGTTGG              | 9.19E-2 |
| 321. bta-miR-11971<br>MIMAT0046336   | 21973                                      | -19.80                         | AAATCACTATCAACCCCTCA<br>            <br>AAGAGTGAGAGACGGGGAGT                | 9.19E-2 |
| 322. bta-miR-11983<br>MIMAT0046376   | 23060                                      | -13.10                         | TCTACTGAAACCATTACCACTGGTT<br>:  :            <br>GGGTG--TCCG--AGCGTGACCAG   | 7.42E-2 |

| 1. miR Name                          | leftmost position of predicted target site | folding energy (in - Kcal/mol) | heteroduplex                                                                            | p value |
|--------------------------------------|--------------------------------------------|--------------------------------|-----------------------------------------------------------------------------------------|---------|
| 323. bta-miR-216a<br>MIMAT0009265    | 28112                                      | -10.50                         | GGACATCTGGAGACCTGAGATTA<br>            <br>AGTGTCAAC - GGTCGACTCTAAT                    | 3.03E-1 |
| 324. bta-miR-142-5p<br>MIMAT0003790  | 28272                                      | -5.40                          | GCTACACTCACT - CTTTATG<br>           <br>CATCACGAAAGATGAAATAC                           | 6.2E-2  |
| 325. bta-miR-411c-5p<br>MIMAT0025545 | 29316                                      | -8.80                          | GGTAATTACCGACTGCCATCAACC<br>         <br>TTACATACAAGAGAC - -TAGTTGG                     | 3.48E-1 |
| 326. bta-miR-129-5p<br>MIMAT0009221  | 29599                                      | -10.10                         | GAATTACTCAG - TTTCAAAAAG<br>  :     :      <br>TCGTTTCGGGTCTGGCGTTTTTC                  | 8.64E-2 |
| 327. bta-miR-2287<br>MIMAT0011794    | 29657                                      | -20.30                         | TATTGC - ACCAGGAGTCCAG<br>             <br>TTCACGACGGTGGTCAGGGTC                        | 2.69E-1 |
| 328. bta-miR-2345<br>MIMAT0011880    | 29690                                      | -10.60                         | GGGGTACTGGTACAGACACAAC<br>  :      :      <br>CTTTAT - TCT - TTTGTGTGTTG                | 2.01E-1 |
| 329. bta-miR-107<br>MIMAT0003785     | 29733                                      | -17.90                         | GATGGCAACCAGCGT - CAACTGCTGCC<br>    :            <br>CTATCG - -GG - -ACATGTT - ACGACGA | 1.11E-1 |
| 330. bta-miR-130a<br>MIMAT0009223    | 30218                                      | -19.80                         | GAGCCCCAATAAACAATGCACTG<br>             <br>TACGGG - AAAATTGTAACGTGAC                   | 5.91E-3 |
| 331. bta-miR-152<br>MIMAT0009238     | 30222                                      | -16.44                         | CCCAA - -TAAACAATGCACTGT<br>         <br>GGGTTCAAGACAGTACGTGACT                         | 5.91E-3 |
| 332. bta-miR-2488<br>MIMAT0012084    | 30522                                      | -7.90                          | AATTTGAATGCATATCAACAA<br>    :      <br>TCTCCCTTAT - CCTAGTTGTA                         | 2.11E-1 |
| 333. bta-miR-2284e<br>MIMAT0012080   | 222                                        | -8.60                          | CAACAAATACGGTCTCGAACTA<br>       :      <br>CCTTTT TAGGCT - -TGCTTGAA                   | 8.01E-2 |
| 334. bta-miR-2285bi<br>MIMAT0046389  | 233                                        | -14.50                         | GTCTCGAACTACA - CTGGGCTC<br>  :            <br>CGGTTTTTCAAGTAGACCCGAA                   | 8.01E-2 |
| 335. bta-miR-2285y<br>MIMAT0029944   | 2214                                       | -11.90                         | TCTTGCAATTTGCATGGGTTTT<br>         <br>TTTTTTCAAACAAACCCAAAA                            | 2.61E-1 |
| 336. bta-miR-2284ab<br>MIMAT0030437  | 5797                                       | -13.00                         | AAAAATTTGAAACAAACTTTTA<br>    : :      <br>TTTTTGGGTT - GGTGTGAAAT                      | 2.39E-2 |



| 1. miR Name                         | leftmost position of predicted target site | folding energy (in - Kcal/mol) | heteroduplex                                                            | p value |
|-------------------------------------|--------------------------------------------|--------------------------------|-------------------------------------------------------------------------|---------|
| 337. bta-miR-2284ab<br>MIMAT0030437 | 7546                                       | -9.10                          | TATAAACCAGGTAATACTTTTA<br>   : :        <br>TTTTTGGGTGGTT-TGAAAAT       | 2.94E-1 |
| 338. bta-miR-2463<br>MIMAT0012050   | 8808                                       | -13.90                         | GTTGCACTTTATTACACATGCAC<br>:      :      <br>GTCTGTAAAG-GTGGTGTACGTC    | 1.54E-1 |
| 339. bta-miR-940<br>MIMAT0009386    | 9261                                       | -12.10                         | TAAAGGT-TTAGCACAGCCTG<br>:  :         <br>CGCCTCGCCCCGGGTCGGAA          | 2.28E-1 |
| 340. bta-miR-2284ab<br>MIMAT0030437 | 9693                                       | -8.30                          | AATGGCTCTTACT--ACTTTTA<br>::  :   :      <br>TTTTTGGG-TTGGTTTGAAAAT     | 1.98E-1 |
| 341. bta-miR-10020<br>MIMAT0040419  | 14821                                      | -10.50                         | TTAATAAATTTGAAAAGCCAG<br> : :       <br>GCGGTACAAGGTTTCTTCGGTG          | 6.08E-3 |
| 342. bta-miR-2463<br>MIMAT0012050   | 15413                                      | -7.30                          | TGTATGTGCTTTAATGTCATGCAA<br> :    :        <br>GTCTGTA-AAGGT-GGTGTACGTC | 7.31E-2 |
| 343. bta-miR-10020<br>MIMAT0040419  | 16602                                      | -12.84                         | GAGATTGAAAAAGTGAAGCCAC<br>        <br>GCGGTACAAGGTTTCTTCGGTG            | 3.48E-1 |
| 344. bta-miR-2428<br>MIMAT0011998   | 17010                                      | -18.80                         | GTATACACTGCG-GCCAGCCA<br>   :  :      <br>TGGAGGCGGCGTGAGGTCGGT         | 3.2E-1  |
| 345. bta-miR-2463<br>MIMAT0012050   | 17016                                      | -16.90                         | ACTGCG--GCCAGC-CATGCAG<br>:  :            <br>GTCTGTAAAGGTGGTGTACGTC    | 3.2E-1  |
| 346. bta-miR-30f<br>MIMAT0009282    | 17149                                      | -8.20                          | CCACTCGTAAGTA-TGTGTTTACT<br>          <br>TCGACTCTCACATCCCACAAATGT      | 3.39E-1 |
| 347. bta-miR-12038<br>MIMAT0046733  | 17730                                      | -15.20                         | ATATATTCACAG--ACTGCAGA<br>:  :             <br>TCCGTGACTGTCTGAAGACGTCT  | 1.09E-1 |
| 348. bta-miR-2463<br>MIMAT0012050   | 19147                                      | -11.40                         | TGTATGTTAACA-AACATGCAT<br> :              <br>GTCTGTAAAGGTGGTGTACGTC    | 3.16E-1 |
| 349. bta-miR-329b<br>MIMAT0009289   | 20107                                      | -13.00                         | GTAATGATGCTCTGGCAACCTCC<br>   :  :   :      <br>TTTGTCTTTGGGTCTTTTGGAGA | 2.82E-1 |
| 350. bta-miR-760-5p<br>MIMAT0009372 | 21548                                      | -9.54                          | TCCAATTACCCAGTTTGAGGGT<br>  : :      <br>GCCCAGACCACCTGACTCCCC          | 1.45E-1 |

| 1. miR Name                           | leftmost position of predicted target site | folding energy (in - Kcal/mol) | heteroduplex                                                                       | p value |
|---------------------------------------|--------------------------------------------|--------------------------------|------------------------------------------------------------------------------------|---------|
| 351. bta-miR-940<br>MIMAT0009386      | 21657                                      | -13.70                         | GCTATGCTGGATATTCAGCCTG<br>      :      <br>CGCCTCGCCC - CCGGGTCGGAA                | 2.25E-1 |
| 352. bta-miR-2285cc<br>MIMAT0046652   | 25627                                      | -7.60                          | TCTAATGGTAATCTCTATGGTTTAA<br>               <br>AGTTTTCCA - -AGTAAGTCCAAAAA        | 2.65E-1 |
| 353. bta-miR-2285n<br>MIMAT0025531    | 25628                                      | -7.00                          | CTAATGGTAATCTCTATGGTTTAA<br>  :    :            <br>GGTTTTCA - -AGTAAGCCCAAAAA     | 2.65E-1 |
| 354. bta-miR-11994<br>MIMAT0046647    | 26803                                      | -8.40                          | AACTTATTGCA - ACAACTCTCT<br>:         <br>GTAGGTCTTGTCCCTTGAGAGT                   | 3.34E-1 |
| 355. bta-miR-12038<br>MIMAT0046733    | 30660                                      | -12.50                         | AAGAGTAGAGAGTTGACTGCAGA<br>   :      <br>TCCGTGACTGTCTGA - AGACGTCT                | 1.28E-1 |
| 356. bta-miR-940<br>MIMAT0009386      | 30671                                      | -16.10                         | GTTGACTGCAGAGGACATCAGCCTT<br>  :          :      <br>CGCCT - -CGCCCC - -GGGTCGGAA  | 1.28E-1 |
| 357. bta-miR-3154<br>MIMAT0025529     | 30675                                      | -15.60                         | ACTGCAGAGGACATCAGCCTTCTT<br>                <br>AGACG - AGGCTG - AG - GGGAAGAC     | 1.28E-1 |
| 358. bta-miR-2440<br>MIMAT0012015     | 2860                                       | -9.90                          | AATACTATTTTAAACACTGCA<br>  : :      <br>AGGTCCCAGAGT - AGTGACGT                    | 1.36E-1 |
| 359. bta-miR-7859<br>MIMAT0030434     | 3429                                       | -11.10                         | TTGCTGGTTGCGATCAGTTTTG<br>   :      <br>AATGTACTTCGACGGTCAAAAA                     | 1.22E-2 |
| 360. bta-miR-11986b<br>MIMAT0046621   | 3639                                       | -5.90                          | GCAGTGTGTTGCATACTGGAAAT<br>   : :      <br>TTTCCTG - ATTGAGTAACCTTTT               | 3.34E-1 |
| 361. bta-miR-10174-3p<br>MIMAT0040928 | 3653                                       | -12.70                         | ACTGGAATGC - ATTAAATGTGAT<br>             <br>GCACCATTAGGGACCGTTACACTA             | 3.34E-1 |
| 362. bta-miR-22-3p<br>MIMAT0012536    | 3840                                       | -12.40                         | TAGTGTGTACAA - -AGCAGCTT<br>:              <br>GTCA - AGAAGTTGACCGTCGAA            | 1.11E-1 |
| 363. bta-miR-7859<br>MIMAT0030434     | 4808                                       | -11.00                         | ATATATGCAGCCAGGATAAAGTTTTT<br>   :              <br>AATGTACTTCG - -AC - -GGTCAAAAA | 3.16E-1 |
| 364. bta-miR-186<br>MIMAT0003818      | 5091                                       | -8.30                          | GGCT - GTAAG - -AAGTTCTTTT<br>:    :     :      <br>TCGGGTTTTCTCTTAAGAAAC          | 1.95E-1 |

| 1. miR Name                         | leftmost position of predicted target site | folding energy (in - Kcal/mol) | heteroduplex                                                                    | p value |
|-------------------------------------|--------------------------------------------|--------------------------------|---------------------------------------------------------------------------------|---------|
| 365. bta-miR-2285cw<br>MIMAT0046702 | 5795                                       | -11.70                         | TTAAAAATTTGAAACAAACTTTT<br>   :::         <br>TCTTTTGGACTT-GATTGAAAA            | 2.39E-2 |
| 366. bta-miR-2284l<br>MIMAT0011824  | 5797                                       | -12.00                         | AAAAATTTGAAACAAACTTTT<br>   :::         <br>TTTTTGGGCTT-GGTTGAAAA               | 2.39E-2 |
| 367. bta-miR-155<br>MIMAT0009241    | 6793                                       | -8.10                          | GTTGCTA--GAGGTGCTTGCAATTAT<br>::       :          <br>TGGGGATAGTGCTA--ATCGTAATT | 3.52E-1 |
| 368. bta-miR-2377<br>MIMAT0011923   | 8254                                       | -13.90                         | TCTGCTAAG-CATGTGCAGG<br>  :             <br>TCTCGGATCCAGACACGTCA                | 3.07E-1 |
| 369. bta-miR-7859<br>MIMAT0030434   | 8449                                       | -12.20                         | CTTAAAGGGGGTGC-AGTTTTT<br> ::             <br>AATGTACTTCGACGGTCAAAAA            | 3.29E-1 |
| 370. bta-miR-302b<br>MIMAT0009280   | 8794                                       | -10.30                         | TATGGTTACCATGTGTTGCACTTT<br>             <br>GATGATTTTGTAC-CTTCGTGAAT           | 1.54E-1 |
| 371. bta-miR-2377<br>MIMAT0011923   | 8833                                       | -14.40                         | TCTGCTGATGG--AGTGCAGT<br>  :             <br>TCTCGG-ATCCAGACACGTCA              | 1.54E-1 |
| 372. bta-miR-494<br>MIMAT0009334    | 9597                                       | -10.30                         | ATATATATCTGTTGT-TGTTTCA<br>: :               <br>CTCCAAAGGGCA-CATACAAAGT        | 6.88E-2 |
| 373. bta-miR-186<br>MIMAT0003818    | 9732                                       | -11.20                         | TTGTAAGCTTAAGAATTCTTTG<br>               <br>TCGGGTTTTCTCTTAAGAAAC              | 2.82E-1 |
| 374. bta-miR-562<br>MIMAT0009349    | 10068                                      | -8.10                          | ACATGTGATATGTTCTGCTTC<br>:       :          <br>CATTTACCATG-TCGACGAAA           | 1.75E-1 |
| 375. bta-miR-2284ac<br>MIMAT0030447 | 11758                                      | -9.00                          | CTTAATTGCT-TGC-AACATTT<br>      :             <br>CCTTTTTTCGGTTCGCTTGTAAC       | 3.25E-1 |
| 376. bta-miR-302b<br>MIMAT0009280   | 11800                                      | -9.90                          | TTGTGGCAATATTGTAGCACTTT<br>  :               <br>GATGATTTTGTACCTTCGTGAAT        | 6.2E-2  |
| 377. bta-miR-2459<br>MIMAT0012044   | 11834                                      | -10.30                         | TACTTGCCACTTCTGATCTGGG<br>      :            <br>TTAGTCGAGGG-TAGTAGACCG         | 6.2E-2  |
| 378. bta-miR-429<br>MIMAT0009315    | 11918                                      | -14.70                         | ATAGCAAGTGCTGACTAGTATTG<br>      :             <br>TGCCGT-AATGGTCTG-TCATAAT     | 1.75E-1 |

| 1. miR Name                           | leftmost position of predicted target site | folding energy (in - Kcal/mol) | heteroduplex                                                                  | p value |
|---------------------------------------|--------------------------------------------|--------------------------------|-------------------------------------------------------------------------------|---------|
| 379. bta-miR-656<br>MIMAT0009361      | 11993                                      | -6.80                          | AGAG--TGAATTTGT-TAATATG<br>                  <br>TCTCCAAC--GACATATTATAA       | 2.39E-1 |
| 380. bta-miR-562<br>MIMAT0009349      | 12113                                      | -8.40                          | GTAATATTGCTAAATCTGCTTA<br>                  <br>CATT--TACCATGTCGACGAAA        | 3.46E-2 |
| 381. bta-miR-2917<br>MIMAT0012885     | 13304                                      | -9.60                          | ACACTACTGTTTCAGTCAA<br> :           <br>TCAGGT-ACA-GTCAGTA                    | 3.12E-1 |
| 382. bta-miR-155<br>MIMAT0009241      | 14842                                      | -18.60                         | GGCTCTATTATGA--AGCATTAT<br>: :    : :       <br>TGGGGATAGTGCTAATCGTAATT       | 6.08E-3 |
| 383. bta-miR-190a<br>MIMAT0009251     | 15778                                      | -6.90                          | ACGATGTCTATCTTCCATATCC<br>          <br>TGGATTATATAGTTTGTATAGT                | 2.69E-1 |
| 384. bta-miR-186<br>MIMAT0003818      | 16155                                      | -9.20                          | TGCATCAGAAAGCCTCTTCTTTG<br>  : :           <br>TCG-GGTTTCTCTTAAGAAAC          | 5.43E-2 |
| 385. bta-miR-10166-5p<br>MIMAT0040913 | 16157                                      | -10.29                         | CATCAGAAAGCCTCTTCTTTGCTGCAA<br>               <br>GT-GTC--AGACACTAG--TCGACGTG | 5.43E-2 |
| 386. bta-miR-494<br>MIMAT0009334      | 16217                                      | -11.00                         | TAAATATGTTTGTAGTGTTTCA<br>  :     <br>CTCCAAAGGGCACATACAAAGT                  | 1.69E-1 |
| 387. bta-miR-10174-3p<br>MIMAT0040928 | 16245                                      | -10.40                         | GTGTGTAACGCACCAGG--ATGTGAT<br>              <br>GCACCATT--AGGGACCGTTACACTA    | 1.36E-1 |
| 388. bta-miR-155<br>MIMAT0009241      | 17834                                      | -9.00                          | GCAGTTGTT-TGA--AGCATTAC<br>: : : :       <br>TGGGGATAGTGCTAATCGTAATT          | 2.98E-1 |
| 389. bta-miR-190a<br>MIMAT0009251     | 19601                                      | -7.40                          | TATTAATA-ATACAACATATCC<br>:          <br>TGGATTATATAGTTTGTATAGT               | 5.58E-3 |
| 390. bta-miR-574<br>MIMAT0024577      | 20365                                      | -24.00                         | CATACGACTC-CA-GCATACTCT<br> :         : :       <br>GTGTG-TGAGTGTGTGTGTGAGT   | 1.89E-1 |
| 391. bta-miR-24<br>MIMAT0009250       | 20831                                      | -16.30                         | ACCGGGTCTGCAGTTC-TTAGGCAG<br>  :     :       <br>TG-ACTA--TAGTCGAGTCATCCGTG   | 2.78E-1 |
| 392. bta-miR-2486-5p<br>MIMAT0012081  | 21585                                      | -9.10                          | AAAGGTTTACAATTTCAACTTCTCG<br>: :           <br>GGGTGGGATGT--GGCACGAAGAGG      | 1.34E-1 |

| 1. miR Name                           | leftmost position of predicted target site | folding energy (in - Kcal/mol) | heteroduplex                                                               | p value |
|---------------------------------------|--------------------------------------------|--------------------------------|----------------------------------------------------------------------------|---------|
| 393. bta-miR-494<br>MIMAT0009334      | 24196                                      | -11.10                         | TGGGATACAGGTGT-TGTTTCC<br>       <br>CTCCAAAGGGCACATACAAAGT                | 3.8E-1  |
| 394. bta-miR-10174-3p<br>MIMAT0040928 | 24226                                      | -11.40                         | AAGCGTAATTTTCACATATGATGTGAA<br>        :    <br>GCACCATTAGGG--ACCGTTACACTA | 1.36E-1 |
| 395. bta-miR-2285bo<br>MIMAT0046627   | 24684                                      | -9.10                          | GGAAC--GTAAGACCTTTTCA<br>:           <br>TTTTGAGCTTGCTTGAAAAGT             | 2.18E-1 |
| 396. bta-miR-656<br>MIMAT0009361      | 24750                                      | -5.00                          | CTCATTTACTTGTAATAATATT<br>:        <br>TCTCCAACGACAT-ATTATAA               | 1.75E-1 |
| 397. bta-miR-494<br>MIMAT0009334      | 24933                                      | -9.40                          | TAATTTACCTGCTGCTAATGTTTCT<br>   :       <br>CTCCAAAGGGC-AC--ATACAAAGT      | 9.48E-2 |
| 398. bta-miR-2440<br>MIMAT0012015     | 26508                                      | -10.70                         | CAAAGTGTTGCCTCCACTGCT<br>      :       <br>AGGTCCCAG-AGTAGTGACGT           | 2.42E-2 |
| 399. bta-miR-2377<br>MIMAT0011923     | 26971                                      | -9.30                          | CTAGTAAAATTTAGTGCAGC<br>   :    :    <br>TCTCGGATCCAGACACGTCA              | 3.43E-1 |
| 400. bta-miR-365-5p<br>MIMAT0012539   | 27139                                      | -14.44                         | GTCA-CTGCGAAGGTTAGTCCCG<br>          <br>GTGTAGACGGGGTTTTTCAGGGA           | 2.14E-1 |
| 401. bta-miR-2284ac<br>MIMAT0030447   | 27324                                      | -9.50                          | GCCGGATGTAATGCTGAACATTT<br>  :       <br>CCTTTTTTCGGTTCG-CTTGTA            | 6.88E-2 |
| 402. bta-miR-10174-3p<br>MIMAT0040928 | 27764                                      | -12.10                         | ATATTACATCCCTTCAATCATGTGAA<br>           <br>GCACCATTAGGGA--CCGTTACACTA    | 2.11E-1 |
| 403. bta-miR-2285cw<br>MIMAT0046702   | 28048                                      | -11.30                         | AGGTAGACCT--TATAACTTTA<br>   :    :        <br>TCTTTTGGACTTGATTGAAAA       | 2.5E-1  |
| 404. bta-miR-2284l<br>MIMAT0011824    | 28050                                      | -9.10                          | GTAGACCT--TATAACTTTA<br>  :     :    <br>TTTTTGGGCTTGTTGAAAA               | 2.5E-1  |
| 405. bta-miR-155<br>MIMAT0009241      | 28053                                      | -12.50                         | GACCTTATAACTTTAAGCATTAT<br>   :           <br>TGGGGATAGTGCTAATCGTAATT      | 2.5E-1  |
| 406. bta-miR-2459<br>MIMAT0012044     | 28102                                      | -11.90                         | CCCTAGTAATGGACATCTGGA<br>:    : :    <br>TGTGCGAGGGTAGTAGACCG              | 3.03E-1 |

| 1. miR Name                           | leftmost position of predicted target site | folding energy (in - Kcal/mol) | heteroduplex                                                                    | p value |
|---------------------------------------|--------------------------------------------|--------------------------------|---------------------------------------------------------------------------------|---------|
| 407. bta-miR-2284ac<br>MIMAT0030447   | 28673                                      | -5.30                          | ACGTTTAGTTAATCCAAACATTA<br>  :         <br>CCTTTTTCGGTT-CGCTTGTAAG              | 1.64E-1 |
| 408. bta-miR-10174-3p<br>MIMAT0040928 | 29196                                      | -8.40                          | TCAGATTTGCC--AGCTTATGTGAC<br>         <br>GCACCATTAGGGACCG-TTACACTA             | 2.11E-1 |
| 409. bta-miR-656<br>MIMAT0009361      | 29365                                      | -5.70                          | CATTGTTGA-GAAATAATATC<br>               <br>TCTCCAACGACATATTATAA                | 3.85E-1 |
| 410. bta-miR-2486-5p<br>MIMAT0012081  | 29529                                      | -15.60                         | CCCA-AGCAAACGCTACTTCTCA<br>          :          <br>GGGTGGGATGTGGC-ACGAAGAGG    | 7.91E-3 |
| 411. bta-miR-365-5p<br>MIMAT0012539   | 29654                                      | -22.20                         | GCCTATTGC-ACCAGGAGTCCCA<br>:         :          <br>GTGTAGACGGGGGTTTTTCAGGGA    | 2.69E-1 |
| 412. bta-miR-8549<br>MIMAT0037488     | 30056                                      | -14.70                         | CAACAGAACCC-CCTACCTC<br>               <br>TATG--GTGGATGATGGAG                  | 2.94E-1 |
| 413. bta-miR-2377<br>MIMAT0011923     | 30383                                      | -14.44                         | AGAGTTGGCCAAAGTGCAGA<br>        : :          <br>TCTCGGATCCAGACACGTCA           | 1.09E-1 |
| 414. bta-miR-656<br>MIMAT0009361      | 30606                                      | -5.90                          | GGAG--AAAATG-ATAATATA<br>:                    <br>TCTCCAACGACATATTATAA          | 4.57E-2 |
| 415. bta-miR-211<br>MIMAT0009263      | 30937                                      | -10.20                         | GCCGAACAAGTGCCCAAGGGAA<br>  :     :              <br>CCGTTT-CCTACTGTTTCCCTT     | 6.29E-2 |
| 416. bta-miR-1179<br>MIMAT0009957     | 1309                                       | -6.10                          | GATGCAGTTG--TAAATGCTT<br>:                <br>GGTTGGTTACTTTCTTACGAA             | 3.57E-1 |
| 417. bta-miR-2464-5p<br>MIMAT0012051  | 5103                                       | -8.30                          | TTCTTTTAATTTTG-ATCAGAAGG<br>  :     :              <br>CAGAAGGTCCAGACGTCGTCTTCA | 9.05E-2 |
| 418. bta-miR-2285cl<br>MIMAT0046681   | 5797                                       | -8.90                          | AAAAATTTGAAACAAACTTTT<br>        : : :            <br>TTTTTGGGCTT-ACTTGAAAT     | 2.39E-2 |
| 419. bta-miR-7691<br>MIMAT0029952     | 6273                                       | -11.70                         | TGGT--GGTGATATCTCAGA<br>  :       :          <br>ATCAATAATCTGGAGAGTCG           | 3.52E-1 |
| 420. bta-miR-1179<br>MIMAT0009957     | 7708                                       | -8.10                          | ACATATGATGATGTTAATGCTA<br>    : :                <br>GGTTGGTTACT-TTCTTACGAA     | 2.18E-1 |

| 1. miR Name                          | leftmost position of predicted target site | folding energy (in - Kcal/mol) | heteroduplex                                                                    | p value |
|--------------------------------------|--------------------------------------------|--------------------------------|---------------------------------------------------------------------------------|---------|
| 421. bta-miR-2285cu<br>MIMAT0046698  | 9615                                       | -10.26                         | TTCAAATCATGCTTTTGGGTAT<br>:        :      <br>CGGTTT-TCCAAGCAGACCCATA           | 6.88E-2 |
| 422. bta-miR-12057<br>MIMAT0046764   | 10046                                      | -13.00                         | GTGATAAGGTCTACTGTCCCAGA<br>   :         <br>CCGAGAGGAAGGTG--AGGGTCA             | 1.75E-1 |
| 423. bta-miR-677<br>MIMAT0012003     | 10162                                      | -12.20                         | CGTCTAAGC--CTTA-CAGTGAT<br>      :        <br>CAGTCTTCGACGAGTAGTCACTC           | 3.56E-2 |
| 424. bta-miR-503-5p<br>MIMAT0025557  | 10562                                      | -12.00                         | TAGCATGGCTTTATGCTGCTA<br>:      :    : :      <br>GTCATG-ACAAGGCGACGAT          | 8.51E-2 |
| 425. bta-miR-2372<br>MIMAT0011917    | 16121                                      | -9.80                          | CTGCTC-TTCTCAAACATCATTA<br>:   :    :      <br>ACTGGGTTAGG-AAAGTAGTAAG          | 5.43E-2 |
| 426. bta-miR-483<br>MIMAT0009327     | 17104                                      | -13.90                         | CCAAGGTCAGG-GTGGAGTGC<br>           <br>TTCTGCCCTCCTCTCCTCACT                   | 3.76E-1 |
| 427. bta-miR-2388-3p<br>MIMAT0011941 | 17778                                      | -13.60                         | TTCAATGTTGCTATTACTCGAGC<br>           <br>AGTAGAGGTCCA--AGGAGCTCG               | 2.86E-1 |
| 428. bta-miR-323<br>MIMAT0009284     | 19038                                      | -11.30                         | ATGTTTGGAACTGTAATGTGG<br>  : :      <br>TCTCCAGCTGGCACATTACACG                  | 2.42E-1 |
| 429. bta-miR-2285br<br>MIMAT0046636  | 19389                                      | -11.11                         | ACAG-CTACTACAGCAGGTTTT<br>           <br>TGTCTTTCAAGTAAGTCCAAAA                 | 3.12E-1 |
| 430. bta-miR-1814c<br>MIMAT0011984   | 19876                                      | -10.60                         | TTTACATTTCCACGACAAAAG<br>    :    :      <br>TTTTGTTTGGGT-TTGTTTTG              | 3.48E-1 |
| 431. bta-miR-2464-5p<br>MIMAT0012051 | 20262                                      | -8.30                          | GTTT--ATGGTAATTTCAACCAGAAGA<br>   :             <br>CAGAAGGTCCA--GACGT-CGTCTTCA | 1.95E-1 |
| 432. bta-miR-451<br>MIMAT0009323     | 21151                                      | -10.50                         | ATTTTGCATTTTGG--ACGGTTT<br>           <br>TTTGAGTCATTACCATTGCCAAA               | 2.01E-1 |
| 433. bta-miR-1179<br>MIMAT0009957    | 21172                                      | -7.50                          | TCTGCACAAATG--CAAAATGCTT<br>:   :            <br>GGTTG--GTTACTTTCTTACGAA        | 2.01E-1 |
| 434. bta-miR-503-5p<br>MIMAT0025557  | 24930                                      | -16.70                         | TTATAATTTACCTGCTGCTA<br>   :      <br>GTCATGACAAGGCGACGAT                       | 9.48E-2 |

| 1. miR Name                          | leftmost position of predicted target site | folding energy (in - Kcal/mol) | heteroduplex                                                             | p value |
|--------------------------------------|--------------------------------------------|--------------------------------|--------------------------------------------------------------------------|---------|
| 435. bta-miR-2285cl<br>MIMAT0046681  | 25659                                      | -5.40                          | CTTAAC-AAACAGAACTTTT<br>         <br>TTTTTGGGCTTACTTGAAAT                | 7.54E-2 |
| 436. bta-miR-2464-5p<br>MIMAT0012051 | 26193                                      | -8.50                          | TAATGCTA-TACT-CA-CAGAAGT<br> :          <br>CAGAAGGTCCAGACGTCGTCTTCA     | 4.38E-2 |
| 437. bta-miR-502a<br>MIMAT0009338    | 27152                                      | -17.50                         | TTAGTCCCGGTCT--GTGCATT<br> :     :       <br>ACTTAGGAACGGGTCCACGTAA      | 2.14E-1 |
| 438. bta-miR-2285cl<br>MIMAT0046681  | 28050                                      | -8.10                          | GTAGACCT-TAT-AACTTTA<br> :   :         <br>TTTTTGGGCTTACTTGAAAT          | 2.5E-1  |
| 439. bta-miR-7691<br>MIMAT0029952    | 28154                                      | -9.90                          | CGGTT-TTA-ATGTCTCAGA<br>:         :      <br>ATCAATAATCTGGAGAGTCG        | 3.71E-1 |
| 440. bta-miR-148c<br>MIMAT0016933    | 29044                                      | -5.10                          | TCAACCCAGAAACAAACAACTTGA<br>               <br>AGTCACGT-ACTGT--CTTGAACC  | 3.15E-2 |
| 441. bta-miR-7691<br>MIMAT0029952    | 29534                                      | -16.00                         | GCAAACTGCTACTTCTCAGC<br>  :     <br>ATCAATAATCTGGAGAGTCG                 | 7.91E-3 |
| 442. bta-miR-12057<br>MIMAT0046764   | 29660                                      | -10.10                         | TGC--ACC-AGGAGTCCCAGC<br>             <br>CCGAGAGGAAGGTGAGGGTCA          | 2.69E-1 |
| 443. bta-miR-12026<br>MIMAT0046719   | 29849                                      | -18.50                         | CCAGGCTGATGTCAATACCCCGGC<br>      :         <br>GGACCGG--TC-GT-CAGGGGCCC | 1.98E-1 |
| 444. bta-miR-2464-5p<br>MIMAT0012051 | 30195                                      | -6.40                          | TTGAATAAGCCCCGC--CAGAAGA<br>             <br>CAGAAGGTCCAGACGTCGTCTTCA    | 5.91E-3 |
| 445. bta-miR-148c<br>MIMAT0016933    | 30288                                      | -8.50                          | GGAG-AAATGTTAAACTTGG<br>      :       <br>AGTCACGTACTGTCTTGAACC          | 4.98E-2 |
| 446. bta-miR-2285ck<br>MIMAT0046676  | 30373                                      | -11.30                         | GATCAAGATTAGA-GTTGGCCA<br>         <br>TGACTTTGTTTCTAAAACCGGT            | 1.09E-1 |
| 447. bta-miR-2439-3p<br>MIMAT0012014 | 2546                                       | -10.00                         | TAAAAGGTTCTG-GTTCTGATT<br>:         <br>AGACGGATGGACAGAAGACTAT           | 2.65E-2 |
| 448. bta-miR-34c<br>MIMAT0003854     | 3448                                       | -14.00                         | TTGGCAGTGATGCAGAACTGCCC<br>   : :       <br>GTTAGTCG-ATTG-ATGTGACGGA     | 1.22E-2 |



| 1. miR Name                          | leftmost position of predicted target site | folding energy (in - Kcal/mol) | heteroduplex                                                              | p value |
|--------------------------------------|--------------------------------------------|--------------------------------|---------------------------------------------------------------------------|---------|
| 449. bta-miR-495<br>MIMAT0009335     | 3523                                       | -8.50                          | CAGTATAGT-CAGT-TGTTTGTTG<br>          :      <br>TTC--TTCACGTGGTACAAACAAA | 2.58E-1 |
| 450. bta-miR-2284a<br>MIMAT0011906   | 5797                                       | -8.50                          | AAAAATTTGAAACAAACTTTT<br>     :::          <br>TTTTTGGG-GTTGCTTGAAAA      | 2.39E-2 |
| 451. bta-miR-6528<br>MIMAT0025562    | 6174                                       | -14.50                         | CCATGAGCAAGCTTCCCTCA<br>          <br>GGAGGAAGGGAGAAGGGAGA                | 3.34E-1 |
| 452. bta-miR-2285dk<br>MIMAT0046749  | 7190                                       | -7.69                          | TGTTTGCTCTTATTAGTATTCAGA<br>  : :   <br>TCAACCGGTTTACAAGTAAGTCC           | 2.98E-1 |
| 453. bta-miR-495<br>MIMAT0009335     | 7488                                       | -11.40                         | TAATGGTGGCACTGGCTTTTGTTT<br>:        ::      <br>TTCTTCAC-GTGGT-ACAAACAAA | 2.95E-2 |
| 454. bta-miR-2439-3p<br>MIMAT0012014 | 7878                                       | -7.84                          | AATGGTTGATAAAAAATCTGATA<br>   : :      <br>AGACGGATGGACAGAAGACTAT         | 3.48E-1 |
| 455. bta-miR-19a<br>MIMAT0004336     | 8794                                       | -8.20                          | TATGGTTACCATG-TGTTGCACT<br>   :      <br>AGTCAAAACGTATCTAAACGTGT          | 1.54E-1 |
| 456. bta-miR-302d<br>MIMAT0009279    | 8796                                       | -10.30                         | TGGTTACCATGTGTTGCACTTT<br>            <br>TGATTTTGTAC-CTTCGTGAAT          | 1.54E-1 |
| 457. bta-miR-302d<br>MIMAT0009279    | 8815                                       | -7.70                          | TTTATTACA--CATGCACTTT<br>:             <br>TGATTTTGTACCTTCGTGAAT          | 1.54E-1 |
| 458. bta-miR-2370-5p<br>MIMAT0011914 | 9499                                       | -14.30                         | TATGCCACGCTTT--ATTTCCCT<br>:     :          <br>TATTGGT-TGAAAGTAAAAGGGT   | 3.48E-1 |
| 459. bta-miR-2439-3p<br>MIMAT0012014 | 10664                                      | -9.10                          | TTAGCCAAGTT-AAGTCTGATC<br>      :       <br>AGACGGATGGACAGAAGACTAT        | 3.07E-1 |
| 460. bta-miR-2317<br>MIMAT0011838    | 11434                                      | -12.70                         | GTGAATGTTTTGTATTTACAGAT<br>            <br>ATAGTCCATAACA-GTAGTGCTC        | 8.26E-2 |
| 461. bta-let-7g MIMAT0003838         | 11446                                      | -12.90                         | TATTTACAGAT--ATACCTCA<br>   : :      <br>TTGACATGTTTGATGATGGAGT           | 8.26E-2 |
| 462. bta-miR-302d<br>MIMAT0009279    | 11802                                      | -9.90                          | GTGGCAATATTGTAGCACTTT<br>  :         <br>TGATTTTGTACCTTCGTGAAT            | 6.2E-2  |

| 1. miR Name                          | leftmost position of predicted target site | folding energy (in - Kcal/mol) | heteroduplex                                                                        | p value |
|--------------------------------------|--------------------------------------------|--------------------------------|-------------------------------------------------------------------------------------|---------|
| 463. bta-miR-19a<br>MIMAT0004336     | 11805                                      | -12.50                         | GCAATATTGTAGCACTTTGCACA<br>   :       <br>AGTCAAACGTATCTAAACGTGT                    | 6.2E-2  |
| 464. bta-miR-2439-3p<br>MIMAT0012014 | 11832                                      | -15.30                         | AATACTTGCC - - ACTTCTGATC<br> : :       <br>AGACGGATGGACAGAAGACTAT                  | 6.2E-2  |
| 465. bta-miR-12027<br>MIMAT0046720   | 13168                                      | -14.10                         | GGGTTGTGCAAATTACGCGGCA<br>   :      <br>TGTGGTCCCTTTGTCGCGCCGT                      | 1.34E-1 |
| 466. bta-miR-2414<br>MIMAT0011977    | 13913                                      | -10.00                         | AGGCTTAGTAGGCATTTTAACACT<br>::  :     :      <br>ATTGTGGTAGGCGTG - - ATTGTGT        | 3.29E-1 |
| 467. bta-miR-495<br>MIMAT0009335     | 14308                                      | -15.10                         | TGGATGGTGTGCC - - TTTTGTGTG<br>:    :            <br>TTCT - TCACGTGGTACAAACAAA      | 3.62E-1 |
| 468. bta-miR-2317<br>MIMAT0011838    | 17721                                      | -9.84                          | GATTATGTTATATATTACAGAC<br>  :          <br>ATAGTCCATAACAGTAGTGTCTC                  | 1.09E-1 |
| 469. bta-miR-2347<br>MIMAT0011882    | 18856                                      | -15.10                         | TTAAAGCTGCCATGCTCTGCA<br>   :        <br>CAAGTCGGAACAAGGAGACGT                      | 6.11E-2 |
| 470. bta-miR-19a<br>MIMAT0004336     | 20411                                      | -9.10                          | TGGTGGTAGTAAGAGTGTTCGCACT<br> :     :   <br>AGTCAAACGT - ATC - TAAACGTGT            | 2.21E-1 |
| 471. bta-miR-2285u<br>MIMAT0031094   | 21192                                      | -9.20                          | TCTTCTAGTGAAGGGTTTTTA<br>        <br>TTTCAAGCA - AGCCAAAAAG                         | 2.01E-1 |
| 472. bta-miR-19a<br>MIMAT0004336     | 21871                                      | -10.80                         | CCAGGAAATGGATTGGACATTGCACC<br>         :       <br>AGTC - AAAACGTA - TCT - AAACGTGT | 2.65E-1 |
| 473. bta-miR-2285da<br>MIMAT0046707  | 22028                                      | -7.44                          | TGAAAAG - - AAAGATGGTTTTT<br>:            <br>TTTTTTC AAGTAAGTCCAAAAG               | 6.99E-2 |
| 474. bta-miR-660<br>MIMAT0004344     | 22107                                      | -15.50                         | AAGCT - AGCTATGATTATGGGTT<br>               <br>GTCGAGGCTATAC - GTTACCCAT           | 3.48E-1 |
| 475. bta-miR-1256<br>MIMAT0009960    | 23221                                      | -10.80                         | TTCACGGTGGAA - - CAATGCCA<br>  :         <br>TAGATCTCTCTTCAGTTACGGA                 | 1.89E-1 |
| 476. bta-miR-2439-3p<br>MIMAT0012014 | 23230                                      | -7.80                          | GAACAATGCCAGGCAGTCTGATA<br>          <br>AGACGGATGGAC - AGAAGACTAT                  | 1.89E-1 |

| 1. miR Name                          | leftmost position of predicted target site | folding energy (in - Kcal/mol) | heteroduplex                                                                          | p value |
|--------------------------------------|--------------------------------------------|--------------------------------|---------------------------------------------------------------------------------------|---------|
| 477. bta-miR-2450b<br>MIMAT0012029   | 23608                                      | -8.30                          | TAGGCTGCATGATGCTTAGACCATA<br> :            <br>GTGTACGTGGAGATGA - - CTGGTAC           | 3.29E-1 |
| 478. bta-miR-2285dk<br>MIMAT0046749  | 24722                                      | -10.50                         | GCAGCCTGATGTCTTTTATTTCAGG<br>  :      <br>TCAACCGGTTTACAAAGTAAGTCC                    | 1.75E-1 |
| 479. bta-miR-2285u<br>MIMAT0031094   | 25026                                      | -5.30                          | TCAACCTGT-AGGTGTTTTTA<br>:                  <br>TTTCAAGCAAGCC- CAAAAAG                | 2.46E-1 |
| 480. bta-miR-2393<br>MIMAT0011946    | 25250                                      | -5.60                          | ACCCCATTTACATCTAAATCTA<br>            <br>TTTTCTTTTGT- TTTTATAGAT                     | 1.04E-1 |
| 481. bta-miR-2893<br>MIMAT0013851    | 26506                                      | -14.30                         | ATCAAAGTGTT- GCCTCCAC<br>:       :            <br>GGGGCCCGTAAGAGGAGGTG                | 2.42E-2 |
| 482. bta-miR-2347<br>MIMAT0011882    | 26555                                      | -18.20                         | CTTTGGCT- GCCACCTCTGCT<br>       :         <br>CAAGTCGGAACAAGGAGACGT                  | 3.46E-2 |
| 483. bta-miR-2284a<br>MIMAT0011906   | 28050                                      | -9.50                          | GTAGACCTTA- - TAACTTTA<br> :    : :          <br>TTTTTGGGGTTGCTTGAAAA                 | 2.5E-1  |
| 484. bta-miR-495<br>MIMAT0009335     | 28826                                      | -18.60                         | TACAAGTCGCAGTATGTTTGTTT<br>           :      <br>TTCTTCA- CGTGGTACAAACAAA             | 1.04E-1 |
| 485. bta-miR-599<br>MIMAT0009354     | 29694                                      | -12.10                         | TACTGGTA- - CAGACACAAC<br>  :            <br>CAAACATTTGACTGTGTTG                      | 2.01E-1 |
| 486. bta-miR-6122-5p<br>MIMAT0024594 | 29730                                      | -9.10                          | GCCGATGGCAACCAGCGTCAACTGC<br>                        <br>CG- TGACC- TATTTC- ATGTTGACT | 1.11E-1 |
| 487. bta-let-7g MIMAT0003838         | 30052                                      | -17.10                         | CTGGCAACAGAACCCCTACCTCT<br>   :           <br>TTGACATGTTT- GATGATGGAGT                | 2.94E-1 |
| 488. bta-let-7d MIMAT0003810         | 30054                                      | -16.20                         | GGCAACAGAACC- CCTACCTCT<br>            <br>TTGATACGTTGGATGATGGAGA                     | 2.94E-1 |
| 489. bta-miR-2414<br>MIMAT0011977    | 30065                                      | -12.10                         | CCCTACC- TCTGGTGTAACACC<br>:         :           <br>ATTGTGGTAGGCGTGATTGTGT           | 2.94E-1 |
| 490. bta-miR-2411-3p<br>MIMAT0011973 | 2496                                       | -8.30                          | TTTAACCATGCCTAGTCAAGTTCAGA<br>                 <br>CCTACACCCTCATTCCTGT- CAAGTCG       | 2.65E-2 |

| 1. miR Name                          | leftmost position of predicted target site | folding energy (in - Kcal/mol) | heteroduplex                                                                              | p value |
|--------------------------------------|--------------------------------------------|--------------------------------|-------------------------------------------------------------------------------------------|---------|
| 491. bta-miR-10a<br>MIMAT0003786     | 4286                                       | -14.50                         | CTGATGCGAGGA - C - ACAGGGTA<br>           <br>GTGTTTAAGCCTAGATGTCCCAT                     | 1.75E-1 |
| 492. bta-miR-320a<br>MIMAT0003534    | 5711                                       | -11.40                         | GTGAACAGTCTTATCAGCTTTA<br>:       :      <br>AGCGGGAGAGTTGGGTCGAAAA                       | 1.62E-1 |
| 493. bta-miR-2284n<br>MIMAT0011846   | 5797                                       | -10.70                         | AAAAATTTGAAACAAACTTTTA<br>      : :          <br>TTTTTGGGCTT - ATTTGAAAAA                 | 2.39E-2 |
| 494. bta-miR-2284c<br>MIMAT0011926   | 5798                                       | -8.90                          | AAAATTTGAAACAAACTTTTA<br>      :            <br>TTTT - GGTTTGTCTTGAAAAA                   | 2.39E-2 |
| 495. bta-miR-320a<br>MIMAT0003534    | 6738                                       | -7.20                          | TAAGCTTGTAGCTTTAGCTTTT<br>: :        <br>AGCGGGAGAGTTGGGTCGAAAA                           | 4.7E-2  |
| 496. bta-miR-2284c<br>MIMAT0011926   | 6928                                       | -6.80                          | TGGATTAAGA - ACACCTTTTA<br>: :   :        <br>TTTTGGTTTTGCTTGAAAAA                        | 2.28E-1 |
| 497. bta-miR-371<br>MIMAT0009301     | 7478                                       | -20.80                         | ATGCT - ATGGCTAATGGTGGCACTG<br>:     : :       :        <br>TGTGAGTTTGTG - - TACCGCCGTGAA | 2.95E-2 |
| 498. bta-miR-2284n<br>MIMAT0011846   | 7546                                       | -6.80                          | TATAAACCAGGTAATACTTTTA<br>    :          <br>TTTTTGGGCTTATT - TGAAAAA                     | 2.94E-1 |
| 499. bta-miR-2284c<br>MIMAT0011926   | 7548                                       | -8.30                          | TAAACCAGGTAATACTTTTA<br>      : :        <br>TTTTTGGTTTTGCTTGAAAAA                        | 2.94E-1 |
| 500. bta-miR-2285aa<br>MIMAT0030435  | 8447                                       | -12.50                         | GTCTTAAAGGGGGT - GCAGTTTT<br>  : :                <br>CGGGTTTTCAAGCAAGGTCAAAA             | 3.29E-1 |
| 501. bta-miR-2284n<br>MIMAT0011846   | 9693                                       | -5.40                          | AATGGCTC - TTAATACTTTTA<br>: :   :        <br>TTTTTGGGCTTATTGAAAAA                        | 1.98E-1 |
| 502. bta-miR-2447<br>MIMAT0012024    | 10050                                      | -17.00                         | TAAGGTC - TACTG - - TCCCAGA<br>:   :     :          <br>TCGTCGGTTTGGCCAAGGGTCT            | 1.75E-1 |
| 503. bta-miR-2411-3p<br>MIMAT0011973 | 10515                                      | -7.54                          | GGTTGT - - CCAATTGCCCCTCAGG<br>               <br>CCTACACCCTCATTCTGTCAAGTCG               | 8.51E-2 |
| 504. bta-miR-2355-3p<br>MIMAT0011892 | 11367                                      | -9.70                          | TGGTACTTACA - CATGGACAAC<br>               <br>TAGAGGTTTGTCTTCCTGTTA                      | 1.86E-1 |

| 1. miR Name                          | leftmost position of predicted target site | folding energy (in - Kcal/mol) | heteroduplex                                                               | p value |
|--------------------------------------|--------------------------------------------|--------------------------------|----------------------------------------------------------------------------|---------|
| 505. bta-miR-2355-3p<br>MIMAT0011892 | 11952                                      | -13.20                         | CGACGATTAC-GCAAAGGACAAT<br>             <br>TAGAGGTTTGTCTT-CCTGTTA         | 2.39E-1 |
| 506. bta-miR-1251<br>MIMAT0009963    | 12086                                      | -16.50                         | AGCAGTT-AAAACAGCTAGAGA<br>     :      <br>TCG-CGGAAACCGTCGATCTCA           | 3.46E-2 |
| 507. bta-miR-2401<br>MIMAT0011958    | 12275                                      | -15.50                         | GTAAGTTAGATAATCAAGCTCT<br>:    :        <br>GTCGGGATCTGT--GTTTCGAGA        | 2.14E-1 |
| 508. bta-miR-22-5p<br>MIMAT0003826   | 14334                                      | -13.50                         | ATTGGCT-ACCATTATAAAGAACT<br>:        :        <br>ATTTCGAACGGTGA--CTTCTTGA | 3.9E-1  |
| 509. bta-miR-320a<br>MIMAT0003534    | 14425                                      | -18.50                         | ATGCT-GCT-GATCCAGCTTTG<br>:  :     :      <br>AGCGGGAGAGTTGGGTCGAAAA       | 7.54E-2 |
| 510. bta-miR-22-5p<br>MIMAT0003826   | 16055                                      | -6.10                          | TGAGTCCTTTTAC--AAGAACA<br>: :         <br>ATTTCGAACGGTGACTTCTTGA           | 3.52E-1 |
| 511. bta-miR-708<br>MIMAT0009367     | 16793                                      | -15.20                         | AGTAGCTAATTTAAGTGCTCCTA<br>:              <br>GGGTCGATCTAACATTCGAGGAA      | 1.34E-1 |
| 512. bta-miR-654<br>MIMAT0009359     | 16864                                      | -6.70                          | ATAGTG-TG-CTTG-AGACATT<br>              <br>TTCCACTACCAGTCGTCTGTAT         | 2.82E-1 |
| 513. bta-miR-2355-3p<br>MIMAT0011892 | 18194                                      | -15.40                         | CACGCGTGATAGCATTGGGACAAA<br>:  :     :      <br>TAGAGGTTTGTCTT--TCCTGTTA   | 2.5E-1  |
| 514. bta-miR-708<br>MIMAT0009367     | 18308                                      | -15.70                         | AAAGGCTGTGGCTAAAGCTCCTC<br>:  : :      <br>GGGTCGATCTAACATTCGAGGAA         | 2.5E-1  |
| 515. bta-miR-2401<br>MIMAT0011958    | 18310                                      | -15.10                         | AGGCTGTGG-CTAAAGCTCC<br>:  :  :        <br>GTCGGGATCTGTGTTTCGAGA           | 2.5E-1  |
| 516. bta-miR-148a<br>MIMAT0003522    | 20417                                      | -10.90                         | TAGTAAGAGTGT-TTGCACTGT<br>         <br>TGTTTCAAGACATCACGTGACT              | 2.21E-1 |
| 517. bta-miR-22-5p<br>MIMAT0003826   | 20989                                      | -7.20                          | ATGACCCTATTACT-AAGAACA<br>: :          <br>ATTTCGAACGGTGACTTCTTGA          | 3.8E-1  |
| 518. bta-miR-12064<br>MIMAT0046771   | 23829                                      | -12.30                         | GCT--TAATGG-TTACTACCC<br> :         <br>CGGTGTGATCCTTATGATGGT              | 2.86E-1 |

| 1. miR Name                            | leftmost position of predicted target site | folding energy (in - Kcal/mol) | heteroduplex                                                                  | p value |
|----------------------------------------|--------------------------------------------|--------------------------------|-------------------------------------------------------------------------------|---------|
| 519. bta-miR-2402<br>MIMAT0011959      | 25173                                      | -15.10                         | TATAGGCACTTGTCTGCAGGTAC<br>               <br>ACGACCGT-CTCA--CCGTCCATA        | 1.89E-1 |
| 520. bta-miR-654<br>MIMAT0009359       | 25498                                      | -9.20                          | CAAAAAATCAAACA-CAGACATA<br>        <br>TTCCACTACCAGTCGTCTGTAT                 | 2.95E-2 |
| 521. bta-miR-412<br>MIMAT0009313       | 27769                                      | -9.00                          | ACATCCCTTCAATCATGTGAAGC<br> :         <br>TGTCGATCACCTGGTCCAATTCA             | 2.11E-1 |
| 522. bta-miR-2299-5p<br>MIMAT0011807   | 29406                                      | -9.20                          | ACTCCTGGTAAGCAATCCAGT<br>   :       <br>AAAGTCTCTTTACTTAGGTCA                 | 3.16E-1 |
| 523. bta-miR-708<br>MIMAT0009367       | 29961                                      | -16.80                         | GAAGGCTCAGGAAGGTCTGCTCCTA<br>:     :           <br>GGGTCA--TCTAACATTCGAGGAA   | 2.01E-1 |
| 524. bta-miR-2285ag-3p<br>MIMAT0040923 | 30283                                      | -15.90                         | GTGGTGGAGAAATGTTAAAACTTGGA<br> :  :  :         <br>AATCGGTTTTT--CAA--GTGAACCT | 4.98E-2 |
| 525. bta-miR-2375<br>MIMAT0011921      | 227                                        | -19.50                         | AATACGGTCTCGAACTA-CACTGGG<br>       :      <br>CTAGTCTGGAG--AGGTAGTGACCC      | 8.01E-2 |
| 526. bta-miR-2363<br>MIMAT0011901      | 3265                                       | -11.90                         | GAGACATCTGATTACAAAGTTGA<br>  :      <br>TTTATAAGG-AACTGGTTCAACT               | 2.65E-1 |
| 527. bta-miR-449a<br>MIMAT0009320      | 3450                                       | -16.90                         | GGCAGTGATGCAG-AAACTGCC<br>:    :  :      <br>TGGTCG-ATTGTTATGTGACGGT          | 1.22E-2 |
| 528. bta-miR-23b-3p<br>MIMAT0003852    | 3654                                       | -12.70                         | CTGGAAATGC-ATTAAATGTGAT<br>               <br>CACCATTAGGGACCGTTACACTA         | 3.34E-1 |
| 529. bta-miR-2285bk<br>MIMAT0046622    | 5795                                       | -9.80                          | TTAAAAATTTGAAACAACTTTT<br>     : :           <br>TCTTTTGTGAG-TTTGCTTGAAAA     | 2.39E-2 |
| 530. bta-miR-374a<br>MIMAT0004342      | 5893                                       | -8.50                          | TGTGACGGAGGTAAGTATTATAC<br>          <br>GTGAATAGTCCA-ACATAATATT              | 6.48E-2 |
| 531. bta-miR-12019<br>MIMAT0046708     | 6695                                       | -13.30                         | ATAAAGTAATTTAC--ACCACAGA<br>  :  :         <br>AGACTCG--AGGTGGTAGGTGTCT       | 1.06E-1 |
| 532. bta-miR-2351<br>MIMAT0011887      | 7884                                       | -5.70                          | TGATAAAAAATCTGATAACTAC<br>:  :     :   <br>TTTGT-GTTATGTTATTGATA              | 3.48E-1 |

| 1. miR Name                          | leftmost position of predicted target site | folding energy (in - Kcal/mol) | heteroduplex                                                                                           | p value |
|--------------------------------------|--------------------------------------------|--------------------------------|--------------------------------------------------------------------------------------------------------|---------|
| 533. bta-miR-2284z<br>MIMAT0025559   | 9610                                       | -7.80                          | GTTGTTTCAAATCATGCTTTTTG<br>: :          :      <br>TTTTTGGGTTT - GTTTGAAAAAA                           | 6.88E-2 |
| 534. bta-let-7a-5p<br>MIMAT0003844   | 11441                                      | -11.40                         | TTTTGTATTTACAGATATACCTCA<br>:   :   :            <br>TTGATATG - - TTG - GATGATGGAGT                    | 8.26E-2 |
| 535. bta-miR-154b<br>MIMAT0025547    | 15709                                      | -14.22                         | AAAATGACATAAAACAATGGACCTCA<br>            : :          <br>GCTTAC - GTG - GTACCTTCTGGAGA               | 1.15E-2 |
| 536. bta-miR-23b-3p<br>MIMAT0003852  | 16246                                      | -10.40                         | TGTGTAACGCACCAGG - - ATGTGAT<br>                       <br>CACCATT - - AGGGACCGTTACACTA                | 1.36E-1 |
| 537. bta-miR-2485<br>MIMAT0012079    | 18383                                      | -7.50                          | GGATGTTGTTAGA - CCTAGAAT<br>:   :                <br>TGATGGACG - TCTAAGATCTTT                          | 2.5E-1  |
| 538. bta-miR-2313-3p<br>MIMAT0011830 | 19029                                      | -17.10                         | GGTTTGTGTATGTTTTGGAAGTGT<br>    : :   :     :              <br>CCG - - TACGT - CG - CACCTTGACC         | 2.42E-1 |
| 539. bta-miR-25<br>MIMAT0003853      | 19305                                      | -10.40                         | ACTTGC - ATCACAAGATGCAATT<br>:                        <br>AGTCTGGCTCTGTTC - ACGTTAC                    | 2.46E-1 |
| 540. bta-miR-2363<br>MIMAT0011901    | 19546                                      | -7.80                          | CCATTATAAATGATAAAGTTGT<br>    :                    <br>TTTATAAGGAAGTGGTTCAACT                          | 1.92E-1 |
| 541. bta-miR-2370-3p<br>MIMAT0011915 | 21498                                      | -14.50                         | TTAAGAATGG - CAGTTGCTTA<br>                               <br>ACCTCTTTCCTTTCAACGAAT                    | 1.45E-1 |
| 542. bta-miR-346<br>MIMAT0009297     | 21501                                      | -21.10                         | AGAATGGCAG - - TTGCTTATGCAGACA<br>                               <br>TCT - - CCGTCCGTACG - - CCCGTCTGT | 1.45E-1 |
| 543. bta-miR-25<br>MIMAT0003853      | 21942                                      | -5.70                          | GATTCATAAACAGCATGCAATT<br>    :                    <br>AGTCTGGCTCTGTT - CACGTTAC                       | 9.19E-2 |
| 544. bta-miR-2400<br>MIMAT0011956    | 22011                                      | -15.80                         | ATAGTT - AAGCT - - TGGTGCTGA<br>:     :                        <br>AGTCAGGCTCGACGGACACGACC             | 6.99E-2 |
| 545. bta-miR-124a<br>MIMAT0003811    | 22664                                      | -8.50                          | TTTACGCCTTATC - - ATGCCTTT<br>  : :                    <br>GAACCGTAAGTGGCGCACGGAAT                     | 1.24E-1 |
| 546. bta-miR-193a-3p<br>MIMAT0003795 | 24103                                      | -12.80                         | TTAGAGATCTCTGTTTGCCAGTA<br>                           <br>TGACCCT - GAAACATCCGGTCAA                    | 3.07E-1 |

| 1. miR Name                         | leftmost position of predicted target site | folding energy (in - Kcal/mol) | heteroduplex                                                                   | p value |
|-------------------------------------|--------------------------------------------|--------------------------------|--------------------------------------------------------------------------------|---------|
| 547. bta-miR-23b-3p<br>MIMAT0003852 | 24227                                      | -11.40                         | AGCGTAATTTACATATGATGTGAA<br>        :        <br>CACCATTAGGG - - ACCGTTACACTA  | 1.36E-1 |
| 548. bta-miR-2375<br>MIMAT0011921   | 24299                                      | -10.40                         | ATGCATATTTT-ACAGACACTGGT<br>   : :   :           <br>CTAGTCTGGAGAGGT-AGTGACCC  | 2.18E-1 |
| 549. bta-miR-346<br>MIMAT0009297    | 24728                                      | -11.70                         | TGATGTCTTTTATT CAGGCAGACT<br>     : :             <br>TCTCCG-TCCGTACGCCCGTCTGT | 1.75E-1 |
| 550. bta-miR-16a<br>MIMAT0009242    | 24762                                      | -14.40                         | TAATAATATT - - GATGCTGCTA<br>:                  <br>GTGGTTATAAATGCACGACGAT     | 1.75E-1 |
| 551. bta-miR-2351<br>MIMAT0011887   | 24797                                      | -5.70                          | GTTTTTCCAGCA-TAACTAT<br>:             <br>TTTGTGTTATGTTATTGATA                 | 3.85E-1 |
| 552. bta-miR-2351<br>MIMAT0011887   | 24875                                      | -7.90                          | ATTTGCAGTCTTTTAACTAT<br>:    :   :          <br>TTTGTGTTATGTTATTGATA           | 2.32E-1 |
| 553. bta-miR-374a<br>MIMAT0004342   | 24914                                      | -10.70                         | CAAGTTGTCAGTTGTATTATAA<br>                 <br>GTGAATAGTCCAACATAATATT          | 9.48E-2 |
| 554. bta-miR-16a<br>MIMAT0009242    | 24928                                      | -17.90                         | TATTATAATTTACCTGCTGCTA<br>:   :                    <br>GTGGTTATAAATGCACGACGAT  | 9.48E-2 |
| 555. bta-miR-25<br>MIMAT0003853     | 25752                                      | -9.90                          | TCGGA - - ATATTAAATGCAATT<br>   :    :           <br>AGTCTGGCTCTGTT CACGTTAC   | 2.5E-1  |
| 556. bta-miR-2375<br>MIMAT0011921   | 25938                                      | -13.30                         | TCGTAGAGCGATT-ACCACTGGT<br>:        :        <br>CTAGTCTGGAGAGGTAGTGACCC       | 2.05E-1 |
| 557. bta-miR-12047<br>MIMAT0046750  | 26567                                      | -12.40                         | CCTCTGCTAGTCTGTTTCCTC<br>:            <br>TCCGTTTCCAGGACAAAGGAC                | 3.46E-2 |
| 558. bta-miR-425-5p<br>MIMAT0003832 | 27000                                      | -10.90                         | GGAGAAGGTTAATGAATGTGTCAA<br>      :        <br>AGTTGCCC - - TCACTAGCACAGTA     | 1.75E-1 |
| 559. bta-miR-23b-3p<br>MIMAT0003852 | 27765                                      | -12.10                         | TATTACATCCCTTCAATCATGTGAA<br>               <br>CACCATTAGGGA - - CCGTTACACTA   | 2.11E-1 |
| 560. bta-miR-2285bk<br>MIMAT0046622 | 28048                                      | -5.70                          | AGGTAGAC-CTTAT-AACTTTA<br>   :   :      :        <br>TCTTTTGTGAGTTTGCTTGAAAA   | 2.5E-1  |



| 1. miR Name                          | leftmost position of predicted target site | folding energy (in - Kcal/mol) | heteroduplex                                                                      | p value |
|--------------------------------------|--------------------------------------------|--------------------------------|-----------------------------------------------------------------------------------|---------|
| 561. bta-miR-23b-3p<br>MIMAT0003852  | 29197                                      | -8.40                          | CAGATTG GCC - - AGCTTATGTGAC<br>           <br>CACCATTAGGGACCG - TTACACTA         | 2.11E-1 |
| 562. bta-miR-2285bk<br>MIMAT0046622  | 29371                                      | -5.06                          | TGAGAAATAATATCTAAACTTTA<br>  :   :      <br>TCTTTTGG - AGTTTGCTTGAAAA             | 3.85E-1 |
| 563. bta-miR-592<br>MIMAT0009353     | 29689                                      | -7.70                          | AGGGGTACTGGTACAGACACAAC<br>:         <br>TGTAGTAGCGTATAACTGTGTTA                  | 2.01E-1 |
| 564. bta-let-7a-5p<br>MIMAT0003844   | 30054                                      | -15.00                         | GGCAACAGAAC - CCTACCTCT<br>            <br>TTGATATGTTGGATGATGGAGT                 | 2.94E-1 |
| 565. bta-miR-12019<br>MIMAT0046708   | 30130                                      | -17.50                         | GCAAGGATGCCACTAAGCCACAGC<br>:       :        <br>AGACTC - GAGGTGGT - AGGTGTCT     | 2.72E-2 |
| 566. bta-miR-12019<br>MIMAT0046708   | 30302                                      | -10.60                         | ACTTGGAAGTAGTGACCCACAGT<br>   :    :        <br>AGACTCGAGGTGG - TAGGTGTCT         | 4.98E-2 |
| 567. bta-miR-12019<br>MIMAT0046708   | 30560                                      | -17.90                         | TATGAG - TCCAAAA - CCACAGC<br>                 <br>AGACTCGAGGTGGTAGGTGTCT         | 3.66E-2 |
| 568. bta-miR-449d<br>MIMAT0011962    | 30676                                      | -23.60                         | CTGCAGAGGACATCAGCCTTC<br>                 <br>GAGGTGTCGTGT - GTCGGAAG             | 1.28E-1 |
| 569. bta-miR-12004<br>MIMAT0046664   | 30942                                      | -19.40                         | ACAAGTGCCCAAGGG - AAGAGCCAG<br>        :        <br>TCCTC - CG - TCTCTCGGTCTCGGTC | 6.29E-2 |
| 570. bta-miR-2397-3p<br>MIMAT0011952 | 2197                                       | -15.70                         | TTTACTACTAGC - ACTGCTCTT<br>           <br>TACGCAAGAACGGTGACGAGAC                 | 2.61E-1 |
| 571. bta-miR-1434-3p<br>MIMAT0012040 | 3100                                       | -8.60                          | CCTGAAGAT - GATGACTTCTTG<br>       :         <br>GGA - GTCTGGAATCT - AAAGAAG      | 1.72E-1 |
| 572. bta-miR-2284q<br>MIMAT0011957   | 3433                                       | -11.90                         | TGGTTGCGATCAGTTTGGCA<br>:          <br>AGGCTTGCT - TGAAAAACCGG                    | 1.22E-2 |
| 573. bta-miR-2429<br>MIMAT0011999    | 4814                                       | -9.00                          | GCAGCCAGGATAAAAGTTTTT<br>         <br>TTTTTTTCCCTTTTCAAAAA                        | 3.16E-1 |
| 574. bta-miR-2285bt<br>MIMAT0046639  | 5796                                       | -5.70                          | TAAAAATTGAAACAAACTTTTA<br>  : :         <br>TCTGTTGGGTTT - ACTTGAAAAA             | 2.39E-2 |

| 1. miR Name                          | leftmost position of predicted target site | folding energy (in - Kcal/mol) | heteroduplex                                                                                        | p value |
|--------------------------------------|--------------------------------------------|--------------------------------|-----------------------------------------------------------------------------------------------------|---------|
| 575. bta-miR-200c<br>MIMAT0003823    | 7186                                       | -5.90                          | CCATTGTTTGCTCTTATTAGTATTC<br>: :           :     <br>AGGTAGTAATGGG--CCGTCATAAT                      | 2.98E-1 |
| 576. bta-miR-2285bt<br>MIMAT0046639  | 7545                                       | -7.30                          | TTATAAACCAGGTAATACTTTTA<br>   :                <br>TCTGTTGGGTTTA-CTTGAAAAA                          | 2.94E-1 |
| 577. bta-miR-6120-3p<br>MIMAT0024591 | 8177                                       | -14.70                         | GTTGTAATAAC-TTGGTGCCAACATA<br> : :                                   <br>CGATA--GGTGCAAC--AGGTTGTAT | 3.62E-1 |
| 578. bta-miR-2429<br>MIMAT0011999    | 8449                                       | -12.40                         | CTTAAAGGGGGTGCAGTTTTT<br>   :   :                 <br>TTTTTTTCCCT-TTCAAAAA                          | 3.29E-1 |
| 579. bta-miR-1434-3p<br>MIMAT0012040 | 9271                                       | -15.50                         | GCACAG-CCTGTGGATTCTTG<br>           :       <br>GGAGTCTGGA-ATCTAAAGAAG                              | 2.28E-1 |
| 580. bta-miR-3120<br>MIMAT0024572    | 9312                                       | -25.10                         | TGCTGGTGCTATACTTGCTGTA<br>   :         :       <br>ACGGACA-GATGTGAACGACAC                           | 2.28E-1 |
| 581. bta-miR-2285bt<br>MIMAT0046639  | 9692                                       | -8.10                          | AAATGGCTC-TTACTACTTTTA<br>   : :                <br>TCTGTTGGGTTTACTTGAAAAA                          | 1.98E-1 |
| 582. bta-miR-1949<br>MIMAT0046755    | 9933                                       | -15.20                         | AACTTCATTCTTGCAATCTGGTATT<br>                       :       <br>TTGA--TACGACCGTAGGACCATAT           | 7.65E-2 |
| 583. bta-miR-8548<br>MIMAT0037487    | 9958                                       | -9.10                          | GTGAAAATGGTTAATCCTA<br> :~                <br>CGTGGTT-CCA-TTAGGAA                                   | 7.65E-2 |
| 584. bta-miR-12022<br>MIMAT0046715   | 10504                                      | -10.80                         | AAGGATGCTCAGGT--TGTCCAA<br>  :   ::               <br>TTTCAGTGA--ACAGCACAGGTT                       | 8.51E-2 |
| 585. bta-miR-195<br>MIMAT0004335     | 10560                                      | -14.30                         | TGTAGCATGGCTTTATGCTGCTA<br>  :    :   :          <br>ACG-GTTATAAAGACACGACGAT                        | 8.51E-2 |
| 586. bta-miR-2461-3p<br>MIMAT0012048 | 10665                                      | -12.50                         | TAGC-CA-AGTT--AAGTCTGA<br>         :          <br>TCCGTGTGACGAGAGTCAGACT                            | 3.07E-1 |
| 587. bta-miR-200c<br>MIMAT0003823    | 11918                                      | -12.00                         | ATAGCAAGTGCCTGACTAGTATTG<br> : :   :     <br>AGGTAGTAATGGGC-CGTCATAAT                               | 1.75E-1 |
| 588. bta-miR-2284o<br>MIMAT0012068   | 14337                                      | -7.64                          | GGCTACCATTATAAAGAACTTG<br> :                    <br>CTTTTGG--GGCTTGCTTGAAA                          | 3.9E-1  |

| 1. miR Name                          | leftmost position of predicted target site | folding energy (in - Kcal/mol) | heteroduplex                                                                           | p value |
|--------------------------------------|--------------------------------------------|--------------------------------|----------------------------------------------------------------------------------------|---------|
| 589. bta-miR-3431<br>MIMAT0017394    | 16507                                      | -20.30                         | AAACGCAAAAGGC - GACTGAGG<br>           <br>TGTAGGTGTTCCGACTGACTCC                      | 2.39E-1 |
| 590. bta-miR-12022<br>MIMAT0046715   | 18677                                      | -13.80                         | TGATTTATATTGTAGTGTCCAT<br> : :            <br>TTTCAGTG - AACAGCACAGGTT                 | 2.36E-2 |
| 591. bta-miR-2397-3p<br>MIMAT0011952 | 18852                                      | -20.00                         | ATGCTTAAAGCTGCCA - TGCTCTG<br>                         <br>TACG - - CAAGAACGGTGACGAGAC | 6.11E-2 |
| 592. bta-miR-6120-3p<br>MIMAT0024591 | 19599                                      | -6.39                          | TTTATT - - AATAATACAACATA<br> : :      <br>CGATAGGTGCAACAGGTTGTAT                      | 5.58E-3 |
| 593. bta-miR-219b-3p<br>MIMAT0040926 | 20012                                      | -6.70                          | GGATGTCATCTTCAGC - CAATTCG<br>  :  :       <br>TGACTAACAGG - TTTGCGTTAAGA              | 7.09E-2 |
| 594. bta-miR-6120-3p<br>MIMAT0024591 | 20749                                      | -8.54                          | AATATCTGAATACTACAACATT<br>   : :      <br>CGATAGGTGCAACAGGTTGTAT                       | 1.92E-1 |
| 595. bta-miR-2429<br>MIMAT0011999    | 21445                                      | -7.60                          | ATACAAATAAAGAAGTTTTT<br> :       <br>TTTTTTTCCCTTTTCAAAAA                              | 1.45E-1 |
| 596. bta-miR-219b-3p<br>MIMAT0040926 | 21943                                      | -9.70                          | ATTTCATAAACAGCATGCAATTCA<br>  :  :       <br>TGACTAACAGGTT - TGCCTTAAGA                | 9.19E-2 |
| 597. bta-miR-2461-3p<br>MIMAT0012048 | 23228                                      | -19.50                         | TGGAACAATGCCAGGCAGTCTGA<br>                <br>TCCGTGTGACG - AGAGTCAGACT               | 1.89E-1 |
| 598. bta-miR-3120<br>MIMAT0024572    | 23666                                      | -11.00                         | TACC - AATGGCTTTTGCTGTT<br>        :  :       <br>ACGGACAGATGTGAACGACAC                | 1.12E-1 |
| 599. bta-miR-2284x<br>MIMAT0017395   | 24682                                      | -9.30                          | TGGGAACGTAAGACCTTTTCA<br>::            <br>TTTTGGGCTTGCTTGAAAAGT                       | 2.18E-1 |
| 600. bta-miR-195<br>MIMAT0004335     | 24760                                      | -15.20                         | TGTAATAATATT - - GATGCTGCTA<br>  : :             <br>ACG - - GTTATAAAGACACGACGAT       | 1.75E-1 |
| 601. bta-miR-195<br>MIMAT0004335     | 24926                                      | -13.30                         | TGTATTATAATTTACCTGCTGCTA<br>  :              <br>ACG - GTTAT - AAAGACACGACGAT          | 9.48E-2 |
| 602. bta-miR-2284o<br>MIMAT0012068   | 25654                                      | -8.80                          | GACTACTTAACAAACAGAACTTT<br>     : :          <br>CTTTTGGG - - GCTTG - CTTGAAA          | 7.54E-2 |

| 1. miR Name                          | leftmost position of predicted target site | folding energy (in - Kcal/mol) | heteroduplex                                                                             | p value |
|--------------------------------------|--------------------------------------------|--------------------------------|------------------------------------------------------------------------------------------|---------|
| 603. bta-miR-2397-3p<br>MIMAT0011952 | 26510                                      | -21.20                         | AAGTGTTCCTCCACTGCTCTC<br>  :          <br>TACGCAAGAACGGTGACGAGAC                         | 2.42E-2 |
| 604. bta-miR-2461-3p<br>MIMAT0012048 | 26558                                      | -16.80                         | TGGCTGCCAC - - CTCTGCTAGTCTGT<br>            :      <br>TCCG - - TGTGACGAGA - - GTCAGACT | 3.46E-2 |
| 605. bta-miR-2397-3p<br>MIMAT0011952 | 26696                                      | -12.50                         | ATGCATTT - - AACAAATGCTCTT<br>       :         <br>TACGCAAGAACGGTGACGAGAC                | 1.72E-1 |
| 606. bta-miR-12062<br>MIMAT0046769   | 27758                                      | -13.00                         | GACGATATA - TTACATCCCT<br>   :   :      <br>TCACTGTGTCCTGGTAGGGT                         | 2.11E-1 |
| 607. bta-miR-193a-5p<br>MIMAT0003794 | 27781                                      | -17.30                         | TCATGTGAAGCTAATTATAAGACCCA<br>         :      <br>AGTAGA - - GCGG - - GCGTTTCTGGGT       | 2.11E-1 |
| 608. bta-miR-3120<br>MIMAT0024572    | 27829                                      | -10.80                         | AGCTACCACAATGCCTGCTGTT<br>   :     : :      <br>ACGG - ACAGATGTGAACGACAC                 | 2.25E-1 |
| 609. bta-miR-138<br>MIMAT0003813     | 29728                                      | -16.30                         | CAGCC - GAT - GGCA - - ACCAGCG<br>        :         <br>GCCGGACTAAGTGTGTGGTCTGA          | 1.11E-1 |
| 610. bta-miR-219b-3p<br>MIMAT0040926 | 30033                                      | -9.10                          | TCGCGTAGT - AGAGC - CAATTCT<br>   :   :      <br>TGACTAACAGGTTTGCGTTAAGA                 | 2.94E-1 |
| 611. bta-miR-544b<br>MIMAT0009345    | 3444                                       | -14.80                         | AGTTTTGGCAGTGATGCAGAAA<br>:        :      <br>CTTGAACAATCTTTACGTCTTA                     | 1.22E-2 |
| 612. bta-miR-2360<br>MIMAT0011898    | 3450                                       | -16.10                         | GGCAGTGATGCAG - AAAGTGCCTT<br>: :     :            <br>TTG - CG - GAGGTCGGAGGACGGGC      | 1.22E-2 |
| 613. bta-miR-2357<br>MIMAT0011894    | 4167                                       | -10.72                         | ACAGCA - GTTTGTTAAAGAGACCAC<br>:      : :      <br>GAGTGTACGAG - ACACGGTCTGGTT           | 3.62E-1 |
| 614. bta-miR-2285db<br>MIMAT0046709  | 5795                                       | -12.20                         | TTAAAAATTTGAAACAAACTTTT<br>        :          <br>TCTTTTGTAGACTT - GCTTGAAAA             | 2.39E-2 |
| 615. bta-miR-2285bx<br>MIMAT0046644  | 5795                                       | -7.70                          | TTAAAAATTTGAAACAAACTTTT<br>        :          <br>TCCTTTTGTAGCTT - GCTTGAAAA             | 2.39E-2 |
| 616. bta-miR-2284b<br>MIMAT0011983   | 5797                                       | -8.20                          | AAAAATTTGAAACAAACTTTT<br>    :          <br>CTTTTGTGGTTTGCTTGAAAA                        | 2.39E-2 |

| 1. miR Name                            | leftmost position of predicted target site | folding energy (in - Kcal/mol) | heteroduplex                                                                  | p value |
|----------------------------------------|--------------------------------------------|--------------------------------|-------------------------------------------------------------------------------|---------|
| 617. bta-miR-2285am-5p<br>MIMAT0040950 | 5797                                       | -9.50                          | AAAAATTTGAAACAAACTTTTA<br>     :       <br>TTTTTGATTT-GATTGAAAAA              | 2.39E-2 |
| 618. bta-miR-27b<br>MIMAT0003546       | 5986                                       | -14.60                         | ATAGGAC-ACACCGTCTGTGAT<br>:   :      :    <br>CGTCTTGAATCGGT-GACACTT          | 2.94E-1 |
| 619. bta-miR-147<br>MIMAT0009237       | 6908                                       | -11.10                         | TTGT--TGGTAAGATCGCACAG<br>  : :  :   :    <br>ATCGTCTTCGTAAAGGCGTGTG          | 2.28E-1 |
| 620. bta-miR-2285ch<br>MIMAT0046671    | 7057                                       | -6.20                          | GATAATTATAAAG-CCATTGAT<br>         <br>CGACCGGTTTTTCAAGTAACTA                 | 2.42E-1 |
| 621. bta-miR-2333<br>MIMAT0011866      | 7516                                       | -12.50                         | CATCAATGGA-ATTGCATTGA<br>      :    <br>CCCCGGACCTCAGACGTAACG                 | 2.95E-2 |
| 622. bta-miR-2333<br>MIMAT0011866      | 9274                                       | -16.40                         | CAGCCTGTGGATTTCTTGGCATTGA<br>    :          <br>CCCCGG-ACCT-CAGA--CGTAACG     | 2.28E-1 |
| 623. bta-miR-12008<br>MIMAT0046675     | 10400                                      | -10.60                         | TAATAATGGGTGATTGTGTTAAAT<br>  :          <br>GGGTTTTCTACT-TCTCAATTTT          | 3.24E-2 |
| 624. bta-miR-182<br>MIMAT0009244       | 11671                                      | -11.60                         | CTTTTGGGTATTGGAGGTGTGCCAAT<br>  :    :  : :    <br>TCACACTCAAGATGGT--AACGGTTT | 3.07E-1 |
| 625. bta-miR-1264<br>MIMAT0046656      | 12620                                      | -16.90                         | ATAGTGGTCCAGATCAGACTTG<br> :       :       <br>TGTCACGAGTTTATTCTGAAC          | 2.18E-1 |
| 626. bta-miR-2335<br>MIMAT0011868      | 14843                                      | -5.90                          | GCTCTATTATGAAGCATTATCA<br>           <br>TAAGTCAATCAGTAGTAATAGA               | 6.08E-3 |
| 627. bta-miR-3660<br>MIMAT0025555      | 15671                                      | -11.40                         | AAATAACGTTTTTATGTCAGA<br> :  :   :    <br>AATTTTACGAGAGGACAGTCA               | 1.45E-1 |
| 628. bta-miR-544b<br>MIMAT0009345      | 17731                                      | -9.70                          | TATATTCACAGA-CTGCAGAAA<br>        <br>CTTGAACAATCTTTACGTCTTA                  | 1.09E-1 |
| 629. bta-miR-490<br>MIMAT0009331       | 19259                                      | -22.70                         | TGGCATGGA-TGCTAAGCAGGTTG<br>:             <br>GTCGTACCTCAGGA--GGTCCAAC        | 2.46E-1 |
| 630. bta-miR-2338<br>MIMAT0011872      | 20006                                      | -20.30                         | GGGTCAGGATGTCATCTTCAGCCA<br>:     : :  :    <br>TGCAGTC-GGGGACAGGAGTCGGA      | 7.09E-2 |

| 1. miR Name                         | leftmost position of predicted target site | folding energy (in - Kcal/mol) | heteroduplex                                                                     | p value |
|-------------------------------------|--------------------------------------------|--------------------------------|----------------------------------------------------------------------------------|---------|
| 631. bta-miR-490<br>MIMAT0009331    | 20796                                      | -10.90                         | TTGCATTTAG - -GTGCAGGTTC<br>               <br>GTCGTACCTCAGGAGGTCCAAC            | 2.61E-1 |
| 632. bta-miR-6534<br>MIMAT0025570   | 20832                                      | -14.40                         | CCGGGTTCTG - CAGTTCTTAGG<br>:           :          <br>TAGGCAGGACTGACGAGAATCT    | 2.78E-1 |
| 633. bta-miR-11980<br>MIMAT0046368  | 20844                                      | -15.70                         | GTTC - TTAGGCAGTGGTTGCCT<br>  :   : :              <br>GAGGCGGTTTCG - -GGCAACGGA | 2.78E-1 |
| 634. bta-miR-544b<br>MIMAT0009345   | 21111                                      | -15.40                         | GAGTTTCTTGGAATGCAGAAT<br>        :              <br>CTTGAACAATCTTTACGTCTTA       | 3.16E-1 |
| 635. bta-miR-2338<br>MIMAT0011872   | 21653                                      | -14.60                         | TCTTGCTATGCTGGATATTCAGCCT<br>:       :          <br>TGCAGTCGGGGAC - -AGGAGTCGGA  | 2.25E-1 |
| 636. bta-miR-2324<br>MIMAT0011853   | 21970                                      | -15.90                         | ATAAAATCACT - -ATCAACCCCT<br>        :          <br>TGTCGGTGTGACGGGGTTGGGGT      | 9.19E-2 |
| 637. bta-miR-2357<br>MIMAT0011894   | 23607                                      | -11.80                         | CTAGGCTGCATGATGCTTAGACCAT<br>      :          <br>GAGTGTACGAGACACGG - TCTGGTT    | 3.29E-1 |
| 638. bta-miR-490<br>MIMAT0009331    | 23835                                      | -11.97                         | TGGTTACTACCCTACTTCAGGTTC<br>:   :     :          <br>GTCG - -TACCTCAGGAGGTCCAAC  | 2.86E-1 |
| 639. bta-miR-299-2<br>MIMAT0046669  | 24052                                      | -18.30                         | GTGGTAGTAC - -AACCACATAC<br>:                      <br>TACCA - AATGGCAGGGTGTATG  | 1.2E-1  |
| 640. bta-miR-182<br>MIMAT0009244    | 25360                                      | -9.50                          | GGTAATCCTTGTA - -TGCCAAC<br>      :          <br>TCACACTCAAGATGGTAACGGTTT        | 1.16E-1 |
| 641. bta-miR-2285db<br>MIMAT0046709 | 25655                                      | -6.90                          | ACTACTTAACAAACAGAACTTTT<br>                   <br>TCTTTTGTAGACTTG - CTTGAAAA     | 7.54E-2 |
| 642. bta-miR-2285bx<br>MIMAT0046644 | 25655                                      | -6.90                          | ACTACTTAACAAACAGAACTTTT<br>                   <br>TCCTTTTGTAGCTTG - CTTGAAAA     | 7.54E-2 |
| 643. bta-miR-2284b<br>MIMAT0011983  | 25656                                      | -10.40                         | CTACTTAACAAACAGAACTTTT<br>                   <br>CTTTTTTGGTTTG - CTTGAAAA        | 7.54E-2 |
| 644. bta-miR-12059<br>MIMAT0046766  | 26061                                      | -16.30                         | TATAGGTA - ATATGGAGGAGT<br>      :            <br>TCCTCCGTCCACCTCCTCT            | 3.76E-1 |

| 1. miR Name                         | leftmost position of predicted target site | folding energy (in - Kcal/mol) | heteroduplex                                                               | p value |
|-------------------------------------|--------------------------------------------|--------------------------------|----------------------------------------------------------------------------|---------|
| 645. bta-miR-27b<br>MIMAT0003546    | 26167                                      | -13.60                         | GAATATGGTAGCTTCTGTGAC<br>   :      <br>CGTCTTGAATCGGTGACACTT               | 4.38E-2 |
| 646. bta-miR-11980<br>MIMAT0046368  | 26503                                      | -11.90                         | GGTATCAAAGT - -GTTGCCT<br>   :      <br>GAGGCGGTTTCGGGCAACGGA              | 2.42E-2 |
| 647. bta-miR-12048<br>MIMAT0046751  | 26569                                      | -16.60                         | TCTG-CTAGTCTGTTTCCTCCTTT<br>      :      <br>AGACCACGAAG-TGGAGGAGGAAC      | 3.46E-2 |
| 648. bta-miR-3660<br>MIMAT0025555   | 26577                                      | -11.40                         | TCTGTTTCCTCCTTTGTCAGC<br>   :      <br>AATTTTACGAGAGGACAGTCA               | 3.46E-2 |
| 649. bta-miR-2474<br>MIMAT0012065   | 27142                                      | -15.50                         | ACTGC-GAAGGTTAGTCCCGGTC<br>     :         <br>AGAGGAAGGTCGACC-GGGCCAT      | 2.14E-1 |
| 650. bta-miR-2333<br>MIMAT0011866   | 27153                                      | -21.30                         | TAGTCCCGGTCTGTGCATTGC<br> :           <br>CCCGGGACCTCAGACGTAACG            | 2.14E-1 |
| 651. bta-miR-2284b<br>MIMAT0011983  | 28048                                      | -7.60                          | AGGTAGACCTTAT-AACTTTA<br> :       :      <br>CTTTTTTGGTTTGCTTGAAAA         | 2.5E-1  |
| 652. bta-miR-182<br>MIMAT0009244    | 28062                                      | -10.80                         | ACTTTAAGCATTATTAATTGCCAAA<br>   :  :       <br>TCACACTCAAGATGGT-AACGGTTT   | 2.5E-1  |
| 653. bta-miR-3660<br>MIMAT0025555   | 29181                                      | -9.50                          | ACTGGCTATTCTT-TGTCAGA<br>:     :      <br>AATTTTACGAGAGGACAGTCA            | 2.11E-1 |
| 654. bta-miR-2285bx<br>MIMAT0046644 | 29370                                      | -5.44                          | TTGAGAAATAATATCTAAACTTTA<br>  :          <br>TCCTTTTTA--GCTTGCTTGAAAA      | 3.85E-1 |
| 655. bta-miR-2285db<br>MIMAT0046709 | 29371                                      | -5.86                          | TGAGAAATAATATCTAAACTTTA<br>  :          <br>TCTTTTTA-GACTTGCTTGAAAA        | 3.85E-1 |
| 656. bta-miR-182<br>MIMAT0009244    | 29778                                      | -12.10                         | CTTG-GAACAGGACCGCATGCCAAA<br>        :      <br>TCACACTCAAGATGGT-AACGGTTT  | 1.83E-1 |
| 657. bta-miR-2338<br>MIMAT0011872   | 30669                                      | -15.30                         | GAGTTGACTGCAGAGGACATCAGCCT<br>  :  :        <br>TGCAATCGGGG--ACAGG-AGTCGGA | 1.28E-1 |
| 658. bta-miR-362-3p<br>MIMAT0012548 | 3626                                       | -9.80                          | CCTTATGTGATTGGCAGTGTGTT<br>    :        <br>CTTAGGAAGTTATC--CACACAA        | 3.34E-1 |

| 1. miR Name                          | leftmost position of predicted target site | folding energy (in - Kcal/mol) | heteroduplex                                                                              | p value |
|--------------------------------------|--------------------------------------------|--------------------------------|-------------------------------------------------------------------------------------------|---------|
| 659. bta-miR-2284g<br>MIMAT0011847   | 5797                                       | -7.30                          | AAAAATTTGAAACAAACTTTT<br>      :          <br>TTTTTCGGCTT - GCTTGAAAA                     | 2.39E-2 |
| 660. bta-miR-2891<br>MIMAT0013849    | 6297                                       | -14.20                         | TGCTAA - AGAACCCAAAGAA<br>:           <br>TTGATTGGATCGGGTTTCTA                            | 7.07E-3 |
| 661. bta-miR-199a-3p<br>MIMAT0003746 | 7884                                       | -10.00                         | TGATAAAAAATCTGATACTACTGC<br>  : :             <br>ATTG - - GTTACACGTCTGATGACA             | 3.48E-1 |
| 662. bta-miR-2395<br>MIMAT0011948    | 8180                                       | -12.79                         | GTAATAACTTGGTGCCAACAT<br>          <br>CAGACTCTCTCGACGGTTGTC                              | 3.62E-1 |
| 663. bta-miR-2315<br>MIMAT0011835    | 8240                                       | -13.90                         | TTCTGATTCAAAA - TTCTGCT<br>   :           <br>GGTCATAGGTTTTTAAGACGA                       | 3.07E-1 |
| 664. bta-miR-2315<br>MIMAT0011835    | 8820                                       | -8.40                          | TACACATGCA - - CTTTCTGCT<br>           <br>GGTCATAGGTTTTTAAGACGA                          | 1.54E-1 |
| 665. bta-miR-362-3p<br>MIMAT0012548  | 9410                                       | -11.20                         | ATGTGATTG - TGTGGTGTGTA<br>:            <br>CTTAGGAAGTTATCCACACAA                         | 1.92E-1 |
| 666. bta-miR-2315<br>MIMAT0011835    | 10064                                      | -14.50                         | CCAGACATGTGATATGTTCTGCT<br>        : :      <br>GGTC - ATAGGTT - TTTAAGACGA               | 1.75E-1 |
| 667. bta-miR-2315<br>MIMAT0011835    | 12058                                      | -14.70                         | GCGTGTTCTAGTGGTTCTGCT<br>   : :      <br>GGTCATAGGTTTTTAAGACGA                            | 3.46E-2 |
| 668. bta-miR-11998<br>MIMAT0046654   | 12087                                      | -14.50                         | GCAGTTAAAAACA - GCTAGAGAA<br>      :      <br>CAACCCTTTTGTGTGATCTCTT                      | 3.46E-2 |
| 669. bta-miR-129<br>MIMAT0009220     | 12714                                      | -5.50                          | TGATGGTCTTAAGTATACAAAAAT<br>:   : :         <br>TCGTTTCGGG - - TCTGGCGTTTTTC              | 3.34E-1 |
| 670. bta-miR-148d<br>MIMAT0046670    | 14335                                      | -9.00                          | TTGGCTACCATTATAAAGAACTTG<br>   :    :      <br>TCAGTCACGTGATG - - TCTTGAAA                | 3.9E-1  |
| 671. bta-miR-2484<br>MIMAT0012077    | 16411                                      | -9.30                          | ATGATTTTAA - - TCGT - ATAGCTA<br>    : :    :      <br>TACGTTAGTTTCAGTAGTATCGAG           | 3.57E-1 |
| 672. bta-miR-32<br>MIMAT0009283      | 19300                                      | -9.30                          | CCGCCACTTGCATCACAAGATGCAATT<br>        :           <br>TACGTTGAAT - CAGT - - AC - ACGTTAT | 2.46E-1 |



| 1. miR Name                          | leftmost position of predicted target site | folding energy (in - Kcal/mol) | heteroduplex                                                                 | p value |
|--------------------------------------|--------------------------------------------|--------------------------------|------------------------------------------------------------------------------|---------|
| 673. bta-miR-2285cg<br>MIMAT0046665  | 20279                                      | -9.20                          | CCAGAAG-ATTATTGGTGGTTTG<br>  :      :          <br>AGTTTTCAAAGTAA-GACCAAAA   | 1.95E-1 |
| 674. bta-miR-2435<br>MIMAT0012007    | 20775                                      | -10.30                         | GTACCTGTTAATATGCGAGTTT<br>:         <br>CGGTTTCTCAAGTAAGCTCAAA               | 2.61E-1 |
| 675. bta-miR-2315<br>MIMAT0011835    | 21158                                      | -8.00                          | ATTTTGGACGG-TTTTCTGCA<br> :  :      <br>GGTCATAGGTTTTTAAGACGA                | 2.01E-1 |
| 676. bta-miR-11998<br>MIMAT0046654   | 21422                                      | -13.60                         | AAAGGGTAAACTACTTGTTAGAGAT<br>           :      <br>CAACCCTTTTG-TG--TGATCTCTT | 1.45E-1 |
| 677. bta-miR-2285dd<br>MIMAT0046712  | 22028                                      | -7.44                          | TGAAAAG--AAAGATGGTTTTT<br>:            <br>ATTTTCAAGTAAGTCCAAAAG             | 6.99E-2 |
| 678. bta-miR-759<br>MIMAT0009371     | 23227                                      | -13.90                         | GTGGAACAATGCCAGGCAGTCTGA<br>  :         <br>CAGTTT-TAAC-AAACGTCAGACG         | 1.89E-1 |
| 679. bta-miR-142-3p<br>MIMAT0003791  | 24515                                      | -9.50                          | GTGAGATTAAGTGTAAACACT<br>   :      <br>GTAGGTATTCATCCTTTGTGA                 | 5.76E-2 |
| 680. bta-miR-199a-3p<br>MIMAT0003746 | 24532                                      | -9.50                          | ACACTATCTATAGCACCATCTACTGG<br>  :            <br>ATTGGT--TACACGT--CTGATGACA  | 5.76E-2 |
| 681. bta-miR-424-5p<br>MIMAT0013593  | 24762                                      | -11.40                         | TAATAATATTGA--TGCTGCTA<br>  :         <br>AGTTTTGTA-CTTAACGACGAC             | 1.75E-1 |
| 682. bta-miR-199a-3p<br>MIMAT0003746 | 25475                                      | -9.40                          | GTACTA-CTTGT--TCTACTGA<br>  :    :      <br>ATTGGTTACACGTCTGATGACA           | 2.95E-2 |
| 683. bta-miR-2285cg<br>MIMAT0046665  | 25627                                      | -7.20                          | TCTAATGGTAATCTCTATGGTTTT<br>  :         <br>AG-TTTTCA-AAGTAAGACCAAAA         | 2.65E-1 |
| 684. bta-miR-148d<br>MIMAT0046670    | 25655                                      | -10.70                         | ACTACTTAACAAACAGAACTTT<br>     <br>TCAGTCACGTGATGTCTTGAAA                    | 7.54E-2 |
| 685. bta-miR-2284g<br>MIMAT0011847   | 25657                                      | -6.90                          | TACTTAACAAACAGAACTTTT<br>         <br>TTTTTCGGCTTG-CTTGAAAA                  | 7.54E-2 |
| 686. bta-miR-2285cg<br>MIMAT0046665  | 27372                                      | -9.82                          | GGAAGAGTTGGATCAATGGTTTA<br>  :          <br>AGTTTTCAA-AGTAAGACCAAAA          | 1.61E-2 |

| 1. miR Name                          | leftmost position of predicted target site | folding energy (in - Kcal/mol) | heteroduplex                                                              | p value |
|--------------------------------------|--------------------------------------------|--------------------------------|---------------------------------------------------------------------------|---------|
| 687. bta-miR-876<br>MIMAT0009380     | 28279                                      | -7.60                          | TCACTCTTTATGG-CAAATCCA<br>  :  :      <br>ACCACTAAGTGTTTCTTTAGGT          | 6.2E-2  |
| 688. bta-miR-32<br>MIMAT0009283      | 28796                                      | -6.40                          | TTTTATTACAATCATATTGCAATT<br>         <br>TACGTTGAATCAGTA-CACGTTAT         | 1.04E-1 |
| 689. bta-miR-129<br>MIMAT0009220     | 29599                                      | -10.10                         | GAATTACTCAG-TTTCAAAAAG<br> :    :      <br>TCGTTCCGGTCTGGCGTTTTTC         | 8.64E-2 |
| 690. bta-miR-199a-3p<br>MIMAT0003746 | 29661                                      | -14.30                         | GCACCAGGAGTCCCAG-CTACTGA<br>   :             <br>ATTGGTT-ACA-CGTCTGATGACA | 2.69E-1 |
| 691. bta-miR-507b<br>MIMAT0046744    | 30252                                      | -12.40                         | TTTGGGAAGAGAGGCCCCAATCA<br>  :       <br>AGGTGAGATTCTTCATGGTTAGT          | 4.98E-2 |
| 692. bta-miR-2441<br>MIMAT0012016    | 354                                        | -14.90                         | AACAGGCGGAATTTGTCTCTGA<br>:  : :      <br>GAGGGTG-ACAGGACAGGACA           | 1.54E-1 |
| 693. bta-miR-105a<br>MIMAT0009217    | 1722                                       | -5.59                          | TGTAAAGGAAACAAATCTCATTTGC<br>         <br>TGGTGTCTCT--CAGACTCGTAAACT      | 3.11E-2 |
| 694. bta-miR-2285cz<br>MIMAT0046706  | 2213                                       | -7.40                          | CTCTTGCATTTGCATGGGTTTT<br>   : : :      <br>TGTTTTTTAAGTAAGCCCCAAC        | 2.61E-1 |
| 695. bta-miR-2285j<br>MIMAT0024585   | 2214                                       | -6.90                          | TCTTGCATTTGCATGGGTTTTA<br>  :       <br>GTTTTTCAAGCAAGACCAAAAA            | 2.61E-1 |
| 696. bta-miR-2284j<br>MIMAT0011827   | 5798                                       | -10.80                         | AAAATTTGAAACAAACTTTTA<br>   : :          <br>TTTTGGACTT-GCTTGAAAAG        | 2.39E-2 |
| 697. bta-miR-105a<br>MIMAT0009217    | 5932                                       | -6.97                          | GCC-CA--ATTTAAACATTTGA<br>:            <br>TGGTGTCTCTCAGACTCGTAAACT       | 6.48E-2 |
| 698. bta-miR-11991<br>MIMAT0046631   | 6923                                       | -10.00                         | CACAGT--GGATTAAGAACAC<br>   :   :          <br>ATGTTAGTTCTATGTCTTGTA      | 2.28E-1 |
| 699. bta-miR-2284j<br>MIMAT0011827   | 7548                                       | -5.50                          | TAAACCAGGTAATACTTTTA<br>     :      <br>TTTTGGACTTGCTTGAAAAG              | 2.94E-1 |
| 700. bta-miR-2285bm<br>MIMAT0046624  | 8451                                       | -6.80                          | TAAAGGGGGTGC--AGTTTTTA<br>:    : :   : :      <br>GTTTTTCAGGTGAGCCAAAAAA  | 3.29E-1 |

| 1. miR Name                          | leftmost position of predicted target site | folding energy (in - Kcal/mol) | heteroduplex                                                                      | p value |
|--------------------------------------|--------------------------------------------|--------------------------------|-----------------------------------------------------------------------------------|---------|
| 701. bta-miR-2419-3p<br>MIMAT0011986 | 9897                                       | -15.20                         | TGATGTGCTTTACCAACCGCCTA<br>    :             <br>ACTA-GCATAATCGTGGGCGGAC          | 1.42E-1 |
| 702. bta-miR-584<br>MIMAT0009352     | 10298                                      | -14.80                         | CTTA-TAAC-GGCAAACCA<br>  :            <br>GAGTCAGGGTCCGTTTGGT                     | 3.62E-1 |
| 703. bta-miR-2296<br>MIMAT0011804    | 10502                                      | -21.10                         | ATAAGGATGCTCAGGTTGTCCA<br>             <br>TCGTCCTTGGAGTC-AACAGGT                 | 8.51E-2 |
| 704. bta-miR-376a<br>MIMAT0009946    | 10692                                      | -10.50                         | AGATGCTTTAGCTTCTATGAC<br>       :      <br>TGCACCTAAAAGGAGATACTA                  | 3.07E-1 |
| 705. bta-miR-2353<br>MIMAT0011889    | 11967                                      | -19.20                         | GGACAATACTGTTTTGCAGGCTT<br>    :      <br>GGTCAGGAGACATGACGTCCGAT                 | 2.39E-1 |
| 706. bta-miR-2452<br>MIMAT0012033    | 12069                                      | -8.30                          | TGGTTCTGCTAATCAACAGCAG<br>  :      <br>TTTTTTCCTTTTGTTCGTG                        | 3.46E-2 |
| 707. bta-miR-2471-5p<br>MIMAT0012061 | 13203                                      | -8.90                          | GCCTGTAGGTATAAAAGATCCTG<br> :      <br>GGAGACTCTAATCTGTCTAGGAG                    | 3.29E-1 |
| 708. bta-miR-105a<br>MIMAT0009217    | 13609                                      | -8.30                          | AACACG-ATTTCTTTACATTTGA<br>   :          <br>TGGTGTCCCTCAGACTCGTAAACT             | 2.73E-1 |
| 709. bta-miR-181b<br>MIMAT0003793    | 14994                                      | -12.40                         | AGTACTATGACTGGCA--GAATGTT<br>:     :          <br>TTGGGTGGCTG-TCGTTACTTACAA       | 9.48E-2 |
| 710. bta-miR-433<br>MIMAT0009318     | 15721                                      | -11.50                         | ACA--ATGGA-CC--TCATGAA<br>                <br>TGTGGCTCCTCGGGTAGTACTA              | 1.15E-2 |
| 711. bta-miR-30e-5p<br>MIMAT0003799  | 17144                                      | -9.60                          | TGACACCACTCGTAAGTATGTGTTTACT<br>    :     :      <br>TCGAAGGT--CAGTTC--CTACAAATGT | 3.39E-1 |
| 712. bta-miR-2285cz<br>MIMAT0046706  | 17660                                      | -11.80                         | AGCTAGGCGCGTTTTGGGTTTG<br>  :      <br>TGTTTTTTAAGTAAGCCCAAAC                     | 3.29E-1 |
| 713. bta-miR-433<br>MIMAT0009318     | 18660                                      | -9.90                          | TCTTTATCAAGT-AATCATGAT<br>  :      <br>TGTGGCTCCTCGGGTAGTACTA                     | 2.36E-2 |
| 714. bta-miR-376a<br>MIMAT0009946    | 18934                                      | -11.70                         | ATTTTGATTTTAAGTTCTATGAT<br>        :      <br>TGCACCTAAAA--GGAGATACTA             | 2.25E-1 |

| 1. miR Name                          | leftmost position of predicted target site | folding energy (in - Kcal/mol) | heteroduplex                                                                         | p value |
|--------------------------------------|--------------------------------------------|--------------------------------|--------------------------------------------------------------------------------------|---------|
| 715. bta-miR-12035<br>MIMAT0046728   | 19514                                      | -15.90                         | TTATACAGGACAGG - - CTGGTGA<br>:      :        <br>AGACCCCTCTGTTTCAGGACCACA           | 1.98E-1 |
| 716. bta-miR-2325a<br>MIMAT0011854   | 19876                                      | -6.90                          | TTTACATTTCCACGACAAAAG<br>:     :      <br>CTTTTTTTGGGT - TTGTTTTG                    | 3.48E-1 |
| 717. bta-miR-105a<br>MIMAT0009217    | 20286                                      | -13.00                         | ATTATTGGTGGTTT - - GCATTTGT<br>  : :     :   :        <br>TGGTGTCC - TCAGACTCGTAAACT | 1.95E-1 |
| 718. bta-miR-11991<br>MIMAT0046631   | 20988                                      | -5.90                          | TATGACCCTATTACTAAGAACAT<br>         <br>ATGTTAGTTCTATG - - TCTTGTA                   | 3.8E-1  |
| 719. bta-miR-2285j<br>MIMAT0024585   | 21153                                      | -5.80                          | TTTGCATTTTGGAC - GGTTTTTC<br>   :          <br>GTTTTTCAAGCAAGACCAAAAA                | 2.01E-1 |
| 720. bta-miR-2285j<br>MIMAT0024585   | 22028                                      | -9.50                          | TGAAAAAGAAAG - - ATGGTTTTT<br>:              <br>GTTTTTCAAGCAAGACCAAAAA              | 6.99E-2 |
| 721. bta-miR-376a<br>MIMAT0009946    | 22099                                      | -7.10                          | CCACTGATAAGCTAGCTATGAT<br>      :      <br>TGCACCTAAAAGG - AGATACTA                  | 3.48E-1 |
| 722. bta-miR-15b<br>MIMAT0003792     | 24760                                      | -15.90                         | TGTAA - TAATATTGATGCTGCTA<br>              <br>ACATTTGGTACTAC - ACGACGAT             | 1.75E-1 |
| 723. bta-miR-2285j<br>MIMAT0024585   | 25628                                      | -6.20                          | CTAATGGTAATCTCTATGGTTTTA<br>:           <br>GTTTTTCA - - AGCAAGACCAAAAA              | 2.65E-1 |
| 724. bta-miR-2284j<br>MIMAT0011827   | 25660                                      | -7.70                          | TTAAC - - AAACAGAACTTTTA<br>            <br>TTTTGGACTTG - CTTGAAAAG                  | 7.54E-2 |
| 725. bta-miR-181b<br>MIMAT0003793    | 26995                                      | -10.70                         | GCTATGGAGAAGGTTAATGAATGTG<br>   :   :      <br>TTGGGTGGCTGTCTG - TTAATTACAA          | 1.75E-1 |
| 726. bta-miR-2386<br>MIMAT0011938    | 27386                                      | -12.20                         | AATGGTTTAAAAACCAACA<br>       <br>CCTTTTGCTTTTGGTTTGT                                | 1.61E-2 |
| 727. bta-miR-2386<br>MIMAT0011938    | 28283                                      | -9.20                          | TCTTTATGGCAAATCCAAACA<br>  :   :          <br>CCTTTTGCTTTT - GGTTTGT                 | 6.2E-2  |
| 728. bta-miR-1247-3p<br>MIMAT0025550 | 30307                                      | -17.80                         | GAAGTAGTGACCC - ACAGTTCCCC<br>  :                 <br>CGAGGTCA - - GGGCTG - CAAGGGC  | 4.98E-2 |

| 1. miR Name                          | leftmost position of predicted target site | folding energy (in - Kcal/mol) | heteroduplex                                                                  | p value |
|--------------------------------------|--------------------------------------------|--------------------------------|-------------------------------------------------------------------------------|---------|
| 729. bta-miR-763<br>MIMAT0009374     | 30336                                      | -18.70                         | GCAGAACT--CGCACCCACAGCTGG<br>              <br>CG--GTGACCAAGGAGG-GTCGACC      | 4.98E-2 |
| 730. bta-miR-2367-3p<br>MIMAT0011910 | 30468                                      | -6.50                          | AGATTTGACAGTACACTTTCAG<br>:               <br>GAAGGACATTCACG-GAAAGTT          | 3.29E-1 |
| 731. bta-miR-2461-5p<br>MIMAT0012047 | 1128                                       | -16.00                         | TGTTATGAGAC--TGCAGAGTGC<br>  :        :      <br>ACGGTCCTAGGCTCTGTCTCACC      | 1.69E-1 |
| 732. bta-miR-374c<br>MIMAT0046394    | 1708                                       | -7.10                          | GGTTGCAAGG--CTATTGTAA<br>  :          <br>TGAATAGTCCAACATAACATT               | 3.11E-2 |
| 733. bta-miR-363<br>MIMAT0003855     | 5646                                       | -11.30                         | TAAGGGTGTAGGAAGTGCAAA<br>:   :        <br>GCGTCTACCTATGGCACGTTA               | 9.48E-2 |
| 734. bta-miR-2376<br>MIMAT0011922    | 6268                                       | -17.70                         | GACGATGGTGGTGATATCTCAGAGA<br>   :        <br>TCGC--GGATCGTTCTAGAGTCTCC        | 3.52E-1 |
| 735. bta-miR-11974<br>MIMAT0046353   | 6785                                       | -19.60                         | GGAGTGTGGTTGC-TAG-AGGTGCT<br>       :   :      <br>CGACAC-CCCCTGTGTCTGTCCACGA | 3.52E-1 |
| 736. bta-miR-210<br>MIMAT0003824     | 6904                                       | -16.60                         | ACTTTTGTGGTAAGATCGCACAGT<br>: :          <br>AGTCGGCGAC--AGTGTGCGTGTCA        | 2.28E-1 |
| 737. bta-miR-2358<br>MIMAT0011896    | 8185                                       | -13.80                         | AACTTGGTGCCAACATATTTGA<br>:   :        <br>AGGTGCTAGGGTTG-ATAAACC             | 3.62E-1 |
| 738. bta-miR-19b<br>MIMAT0004337     | 8794                                       | -10.00                         | TATGGTTACCATG-TGTTGCACT<br>         <br>AGTCAAAACGTACCTAAACGTGT               | 1.54E-1 |
| 739. bta-miR-2285z<br>MIMAT0029950   | 8816                                       | -10.20                         | TTATTACACATGCACTTTCTGC<br>          <br>TCCTGGACTTACTTGAAAGACC                | 1.54E-1 |
| 740. bta-miR-12017<br>MIMAT0046697   | 8893                                       | -11.92                         | GCTAGTGGCTGTGTGCTTTCTCTGC<br>:            <br>CAAGTAC-AGTTTTTCG--AGGAGACA     | 2.69E-1 |
| 741. bta-miR-221<br>MIMAT0003529     | 10546                                      | -11.60                         | CAATCT-GTTAATTTTGTAGCA<br>  :   :   :      <br>TTTGGGTCGTCTGTTACATCGA         | 8.51E-2 |
| 742. bta-miR-19b<br>MIMAT0004337     | 11805                                      | -12.50                         | GCAATATTGTAGCACTTTCACACA<br>    :        <br>AGTCAAAACGTACCTAAACGTGT          | 6.2E-2  |

| 1. miR Name                           | leftmost position of predicted target site | folding energy (in - Kcal/mol) | heteroduplex                                                                           | p value |
|---------------------------------------|--------------------------------------------|--------------------------------|----------------------------------------------------------------------------------------|---------|
| 743. bta-miR-92b<br>MIMAT0009384      | 12327                                      | -7.50                          | TTGTGTACCATTGAATGCAATC<br>  : :         <br>CCTCCGGCCCTGCTCACGTTAT                     | 9.78E-2 |
| 744. bta-miR-2385-5p<br>MIMAT0011935  | 13977                                      | -16.90                         | GAC - TATGTTATTGCAGCCCCAG<br>:      : ::  :        <br>TTGCATGAGGTGA - -ACGGGGTC       | 3.48E-1 |
| 745. bta-miR-10164-3p<br>MIMAT0040911 | 14512                                      | -11.30                         | GCGGTGTAAAAATTTCAAACAGTTA<br>  :   :    :  :        <br>CGTCG - GTTCGGAGGATTGTCAAC     | 5.76E-2 |
| 746. bta-miR-2319b<br>MIMAT0011843    | 16083                                      | -19.50                         | AGAAGTGCAGTTATGCAGAGTG<br>        :      <br>GATTCACG - GATTATGTCTCAT                  | 3.52E-1 |
| 747. bta-miR-12054<br>MIMAT0046761    | 20113                                      | -15.30                         | ATGC - TCTGGCAACCTCCAC<br>      :      <br>CACGTAGG - -GGTGGAGGTC                      | 2.82E-1 |
| 748. bta-miR-2461-5p<br>MIMAT0012047  | 20393                                      | -15.40                         | TATCA - CTGATGAGA - AGAGTGG<br>:    :          <br>ACGGTCCTAGGCTCTGTCTCACC             | 2.21E-1 |
| 749. bta-miR-19b<br>MIMAT0004337      | 20410                                      | -10.10                         | GTGGTGGTAGTAAGAGTGTTCGACT<br>:       :     :      <br>AGTCAAAA - CGTAC - C - TAAACGTGT | 2.21E-1 |
| 750. bta-miR-2313-5p<br>MIMAT0011829  | 21155                                      | -13.60                         | TGCATTTTGGACGGTTTCTGCACA<br>         :      <br>ACG - -GAACC - AGGAGTCGACGTGA          | 2.01E-1 |
| 751. bta-miR-2358<br>MIMAT0011896     | 21214                                      | -9.60                          | TTGGC - AT - -AAATTATTTGG<br>  : :      :      <br>AGGTGCTAGGGTTGATAAACC               | 2.01E-1 |
| 752. bta-miR-10164-3p<br>MIMAT0040911 | 21281                                      | -11.40                         | GTTTTGGAGAAATTCC - -ACAGTTT<br>  : : :    :         <br>CGTCGGTTC - -GGAGGATTGTCAAC    | 7.65E-2 |
| 753. bta-miR-19b<br>MIMAT0004337      | 21871                                      | -13.10                         | CCAGGAAATGGATTGGACATTGCACC<br>                  <br>AGTC - AAAACGTA - CCT - AAACGTGT   | 2.65E-1 |
| 754. bta-miR-2358<br>MIMAT0011896     | 24860                                      | -11.50                         | TGGGCAATTTGGGCTATTTGC<br>:     : :      <br>AGGTGCTAGGGTTGATAAACC                      | 2.32E-1 |
| 755. bta-miR-10164-3p<br>MIMAT0040911 | 26221                                      | -8.30                          | CTACTTGA - C - -ACTACACAGTTG<br>:             <br>CGTCGGTTCGGAGGAT - TGTCAAC           | 1.95E-1 |
| 756. bta-miR-12017<br>MIMAT0046697    | 26550                                      | -11.10                         | ATACACTTTGGCTGCCACCTCTGC<br>     :         <br>CAAGTACAGTTTTCG - AGGAGACA              | 3.46E-2 |

| 1. miR Name                           | leftmost position of predicted target site | folding energy (in - Kcal/mol) | heteroduplex                                                                | p value |
|---------------------------------------|--------------------------------------------|--------------------------------|-----------------------------------------------------------------------------|---------|
| 757. bta-miR-12054<br>MIMAT0046761    | 27347                                      | -16.80                         | CAACA-CCCAACCTCCAT<br>            <br>CACGTAGGGGTGGAGGTC                    | 6.88E-2 |
| 758. bta-miR-12017<br>MIMAT0046697    | 30051                                      | -10.10                         | TCTGGCAACAGAACCCCTACCTCTGG<br>  :          <br>CAAGTACAGTTTT- - CGA-GGAGACA | 2.94E-1 |
| 759. bta-miR-10164-3p<br>MIMAT0040911 | 30304                                      | -8.00                          | TTGGAACTAGTGACC- CACAGTTC<br>:    :         <br>CGTC-GGTTCGGAGGATTGTCAAC    | 4.98E-2 |
| 760. bta-miR-12037<br>MIMAT0046732    | 240                                        | -7.00                          | ACTACACTGGG- CTCCAGAATT<br>      :       <br>TGAT- - TTCTCTTCTGTCTTAC       | 8.01E-2 |
| 761. bta-miR-205<br>MIMAT0003545      | 1030                                       | -12.30                         | AAGACATTGCAAGAAATGAAGGC<br>    :         <br>GTCTGAGGC- CACCTTACTTCCT       | 2.35E-1 |
| 762. bta-miR-2285bp<br>MIMAT0046633   | 1673                                       | -8.00                          | AGTCTTATGACGGTTTGGTTTA<br>    :       <br>TGTGTTTCAAGCAAGACCAAAA            | 3.11E-2 |
| 763. bta-miR-545-5p<br>MIMAT0003806   | 1912                                       | -10.10                         | AGTTTAG- AAACTTTTACTGT<br>: :: :          <br>GTAGGTTATTTGTAAATGACT         | 3.9E-1  |
| 764. bta-miR-2285h<br>MIMAT0024583    | 2214                                       | -7.20                          | TCTTGCATTTGCATGGGTTTTTA<br>  :         <br>GTATTTCAAGCAAAGCCAAAAG           | 2.61E-1 |
| 765. bta-miR-2285af<br>MIMAT0031057   | 3431                                       | -9.10                          | GCTGGTTGCGATCAGTTTTGGC<br>: :         <br>TTGGACTTGTT- CGAAAAACCG           | 1.22E-2 |
| 766. bta-miR-2285cx<br>MIMAT0046704   | 3492                                       | -15.10                         | TTTGCAAGATC- TTTGGGTGTT<br> :          <br>AGTTTTTCAAGTAAACCCACAA           | 2.58E-1 |
| 767. bta-miR-2320-3p<br>MIMAT0011845  | 3906                                       | -15.30                         | TAAACAAATTGATGATCATCGT<br>       :       <br>TTTTGTGTCCCTGGTAGTAGCT         | 4.64E-2 |
| 768. bta-miR-1306<br>MIMAT0009974     | 6788                                       | -12.90                         | GTGTGGTTGC- - TAGAGGTGC<br>  :             <br>CCTGCAAACGTCCCTCCACC         | 3.52E-1 |
| 769. bta-miR-96<br>MIMAT0009388       | 8176                                       | -13.80                         | AGTTGTAATAACTTGGTGCCAAC<br>  :      :       <br>TCGTTTTTACACGATCACGGTTT     | 3.62E-1 |
| 770. bta-miR-2285af<br>MIMAT0031057   | 8738                                       | -11.10                         | TAGTAGACCAGG- ATTTTGGC<br>    :       <br>TTGGACTTGTTGAAAAACCG              | 3.52E-1 |

| 1. miR Name                         | leftmost position of predicted target site | folding energy (in - Kcal/mol) | heteroduplex                                                             | p value |
|-------------------------------------|--------------------------------------------|--------------------------------|--------------------------------------------------------------------------|---------|
| 771. bta-miR-2294<br>MIMAT0011802   | 9261                                       | -11.70                         | TAAAGGT-TTAGC-ACAGCCTG<br>  : ::       <br>TCGTCTACGGGAGATGTCGGAG        | 2.28E-1 |
| 772. bta-miR-2285af<br>MIMAT0031057 | 9614                                       | -11.40                         | TTTCAAATCATGCTTTTGGG<br>        <br>TTGGACTTGTTCGAAAAACCG                | 6.88E-2 |
| 773. bta-miR-324<br>MIMAT0009285    | 10488                                      | -14.30                         | TTTTTATGGTCCTTATAAGGATGCT<br> :         <br>TGTGGTTACGGGA--TCCCCTACGC    | 8.51E-2 |
| 774. bta-miR-383<br>MIMAT0009309    | 10666                                      | -20.30                         | AGCCA-AGTTA-AGTCTGATCT<br>       : :       <br>TCGGTGTTAGTGGAAGACTAGA    | 3.07E-1 |
| 775. bta-miR-543<br>MIMAT0009344    | 11422                                      | -17.50                         | AAGTGGGTTGCCGTGAATGTTT<br>:   :     <br>TTCTTCACGTGGCGCTTACAAA           | 8.26E-2 |
| 776. bta-miR-1306<br>MIMAT0009974   | 11672                                      | -13.40                         | TTTTG--GGTATTGGAGGTGT<br>:   :       <br>CCTGCAAACGTCCCCTCCACC           | 3.07E-1 |
| 777. bta-miR-12002b<br>MIMAT0046694 | 12482                                      | -10.50                         | CAAATAAGCAGTTGCATGAGA<br>    :      <br>TCGATTCTAAGGTGTACTCC             | 2.14E-1 |
| 778. bta-miR-543<br>MIMAT0009344    | 12639                                      | -6.20                          | TTGTAATACACCTACTCAATGTTA<br>          <br>TTCTTCACGTGG--CGCTTACAAA       | 2.18E-1 |
| 779. bta-miR-2379<br>MIMAT0011925   | 13976                                      | -11.20                         | TGACTATGTT--ATTGCAGCCC<br>            <br>TTTTTATAGAAGAGGTCTGTCGGA       | 3.48E-1 |
| 780. bta-miR-12037<br>MIMAT0046732  | 14994                                      | -10.90                         | AGTACTATGACTGGCAGAATG<br>    :     <br>TGATTTCTCT-TCTGTCTTAC             | 9.48E-2 |
| 781. bta-miR-543<br>MIMAT0009344    | 14995                                      | -10.20                         | GTACTATG-ACTGGCAGAATGTTT<br>     :       <br>TTCTTCACGTGGC--GCTTACAAA    | 9.48E-2 |
| 782. bta-miR-543<br>MIMAT0009344    | 15010                                      | -5.80                          | GAATGTTTCATCAAAAATGTTT<br>  :       <br>TTCTTCACGTGGCGCTTACAAA           | 9.48E-2 |
| 783. bta-miR-543<br>MIMAT0009344    | 17749                                      | -11.80                         | AAACAGCGCATTCTGTAAATGTTA<br>        :       <br>TTCTTCACGT--GGCGCTTACAAA | 1.09E-1 |
| 784. bta-miR-2285af<br>MIMAT0031057 | 19029                                      | -5.10                          | GTTTTGTGTA--TGTTTTGGA<br>::    :       <br>TTGGACTTGTTCGAAAAACCG         | 2.42E-1 |



| 1. miR Name                         | leftmost position of predicted target site | folding energy (in - Kcal/mol) | heteroduplex                                                                  | p value |
|-------------------------------------|--------------------------------------------|--------------------------------|-------------------------------------------------------------------------------|---------|
| 785. bta-miR-2294<br>MIMAT0011802   | 20019                                      | -19.00                         | ATCTTCAGCCAATTCGACAGCCTG<br>            <br>TCGTCTACGG - - GAGATGTCGGAG       | 7.09E-2 |
| 786. bta-miR-2285bp<br>MIMAT0046633 | 20278                                      | -5.30                          | ACCAGAAGATTATTGGTGGTTTG<br>   :            <br>TGTGTTTC - AAGCAAGACCAAAA      | 1.95E-1 |
| 787. bta-miR-200a<br>MIMAT0003822   | 20407                                      | -6.80                          | AGAGTGGT - GGTAAGAGTGT<br>:      : :         <br>TTGTAGCAATGGTC - - TGTACAAT  | 2.21E-1 |
| 788. bta-miR-12037<br>MIMAT0046732  | 21114                                      | -9.70                          | TTTTCTTGAATGCAGAAATT<br>:     :      <br>TGATTTCTCTTCTGTCTTAC                 | 3.16E-1 |
| 789. bta-miR-2285h<br>MIMAT0024583  | 21153                                      | -10.80                         | TTTGCATTTTG - GACGGTTTTT<br>   :        <br>GTATTTCAAGCAAAGCCAAAAG            | 2.01E-1 |
| 790. bta-miR-205<br>MIMAT0003545    | 21186                                      | -12.00                         | AATGCTTC - TTCTAGTGAAGGG<br>:    :   :      <br>GTCTGAGGCCACCTTACTTCCT        | 2.01E-1 |
| 791. bta-miR-2294<br>MIMAT0011802   | 21655                                      | -12.90                         | TTGCTATGCTGGATATTCAGCCTG<br>    :      <br>TCGTCTACGG - - GAGATGTCGGAG        | 2.25E-1 |
| 792. bta-miR-2285bp<br>MIMAT0046633 | 22027                                      | -7.30                          | CTGAAAAGAAAG - - ATGGTTTT<br>           <br>TGTGTTTCAAGCAAGACCAAAA            | 6.99E-2 |
| 793. bta-miR-127<br>MIMAT0003787    | 23497                                      | -8.60                          | ACCTATTTGT - GTGTATGATCCGC<br>  :   :        <br>TCGGT - - TCGAGTCTGCCTAGGCT  | 3.48E-1 |
| 794. bta-miR-543<br>MIMAT0009344    | 24934                                      | -11.30                         | AATTTACCTGCTGCTAATGTTT<br>:   :         <br>TTCTTCACGTGGCGCTTACAAA            | 9.48E-2 |
| 795. bta-miR-2285bp<br>MIMAT0046633 | 25627                                      | -6.20                          | TCTAATGGTAATCTCTATGGTTTT<br>:            <br>TGTGTTTCA - - AGCAAGACCAAAA      | 2.65E-1 |
| 796. bta-miR-12001<br>MIMAT0046660  | 26142                                      | -9.60                          | TGCAGCATG - - TAAATCACAGT<br>               <br>AGGTCCCACTTCGGGAGTGTC         | 1.78E-1 |
| 797. bta-miR-2285bp<br>MIMAT0046633 | 27371                                      | -10.40                         | AGGAAGAGTTGGATCAATGGTTTA<br>  :               <br>TGTGTTTCAAGCAAG - - ACCAAAA | 1.61E-2 |
| 798. bta-miR-2337<br>MIMAT0011870   | 27384                                      | -7.40                          | TCAATGGTTTAA - AAACCAA<br>           <br>TTTTTCCTTATTCTTTGGTG                 | 1.61E-2 |

| 1. miR Name                         | leftmost position of predicted target site | folding energy (in - Kcal/mol) | heteroduplex                                                              | p value |
|-------------------------------------|--------------------------------------------|--------------------------------|---------------------------------------------------------------------------|---------|
| 799. bta-miR-2337<br>MIMAT0011870   | 28635                                      | -9.20                          | TTACAACGATGTAAAACCAC<br>:  :      <br>TTTTTCCTTATTCTTTGGTG                | 1.78E-1 |
| 800. bta-miR-2337<br>MIMAT0011870   | 29492                                      | -5.30                          | ATCTAGAAATGTTCAAACCAG<br>      :      <br>TTTTTCCTTAT-TCTTTGGTG           | 7.91E-3 |
| 801. bta-miR-2337<br>MIMAT0011870   | 30557                                      | -8.50                          | GAATATGAGTCCAAAACCAC<br>  :       <br>TTTTTCCTTATTCTTTGGTG                | 3.66E-2 |
| 802. bta-miR-760-3p<br>MIMAT0022951 | 30947                                      | -18.40                         | TGCCCCAGGG- -AAGAGCCA<br>       : :      <br>AGGGGTGTCTGGGTCTCGGC         | 6.29E-2 |
| 803. bta-miR-665<br>MIMAT0009363    | 1681                                       | -15.00                         | GACGGT-TTGGTTTATACTGGA<br>  :  : :      <br>TCCCCGGAGCCG- -GATGACCA       | 3.11E-2 |
| 804. bta-miR-665<br>MIMAT0009363    | 3640                                       | -11.00                         | CAGTGTGTTG- CATACTGGA<br> :  :         <br>TCCCCGGAGCCGGATGACCA           | 3.34E-1 |
| 805. bta-miR-448<br>MIMAT0009319    | 5490                                       | -9.60                          | TGTGGACG- CT- -GTTATGCAT<br>   :  :      <br>TACCTGTAGGATGTATACGTT        | 2.86E-1 |
| 806. bta-miR-2285cq<br>MIMAT0046688 | 5795                                       | -12.00                         | TTAAAAAATTGAAACAACTTTT<br>     :             <br>TCTTTTGTGACCTT-GTTTGAAAA | 2.39E-2 |
| 807. bta-miR-2285av<br>MIMAT0046347 | 5797                                       | -10.90                         | AAAAAATTGAAACAACTTTT<br>     : :           <br>TTTTTGGGCTT-GCTTGAAAA      | 2.39E-2 |
| 808. bta-miR-758<br>MIMAT0009370    | 5867                                       | -11.90                         | ATAAACCTGACT-TGTCACAAT<br>   :      <br>CCAATCACCTGGTCCAGTGTTT            | 6.48E-2 |
| 809. bta-miR-3613b<br>MIMAT0029948  | 7492                                       | -7.10                          | GGTGGCACT- -GGCTTTTGTTT<br>            <br>CAAC-ATGAAAAAAAAACAAG          | 2.95E-2 |
| 810. bta-miR-2285av<br>MIMAT0046347 | 7547                                       | -6.20                          | ATAAACCCAGGTAATACTTTT<br>     :      <br>TTTTTGGGCTTGCTTGAAAA             | 2.94E-1 |
| 811. bta-miR-448<br>MIMAT0009319    | 7771                                       | -7.00                          | AAGAGTGTGCCTA-ATATGCAT<br>         <br>TACCTGTAGGATGTATACGTT              | 8.64E-2 |
| 812. bta-miR-1271<br>MIMAT0009975   | 8177                                       | -17.10                         | GTTGTAATAACTTGGTGCCAAC<br>             <br>ACTCATGAATGATCCACGGTTC         | 3.62E-1 |

| 1. miR Name                         | leftmost position of predicted target site | folding energy (in - Kcal/mol) | heteroduplex                                                                    | p value |
|-------------------------------------|--------------------------------------------|--------------------------------|---------------------------------------------------------------------------------|---------|
| 813. bta-miR-2284aa<br>MIMAT0025560 | 9611                                       | -7.80                          | TTGTTTCAAATCATGCTTTTGT<br>: :        :      <br>TTTTGGGTTT-GTTTGAAAAA           | 6.88E-2 |
| 814. bta-miR-448<br>MIMAT0009319    | 10415                                      | -9.40                          | GTGTAAATTTGTGTATATGCAT<br>:       :   :      <br>TACCCT-GTAGGATGTATACGTT        | 3.24E-2 |
| 815. bta-miR-2285q<br>MIMAT0025574  | 10478                                      | -13.80                         | TCAATGGGGATTTTTATGGTCCTT<br>:     :     :      <br>GGTCTTCAAGTAAGT-CCAGGAA      | 8.51E-2 |
| 816. bta-miR-1271<br>MIMAT0009975   | 11675                                      | -18.70                         | TGGGTATT-GGAGGTGTGCCAAT<br>  :     :   :      <br>ACTCATGAATGATC-CACGGTTC       | 3.07E-1 |
| 817. bta-miR-216b<br>MIMAT0009266   | 16552                                      | -6.63                          | CAGCA-ACAATACAAGAGATTG<br>:          <br>AGTGTAACGGACGTCTCTAAA                  | 2.36E-2 |
| 818. bta-miR-29a<br>MIMAT0003518    | 17101                                      | -16.80                         | CTGCCAAGGTCAGGGTGGAGTGCTAT<br>:         :        <br>ATTGGCTAAAGTCT--AC-CACGATC | 3.76E-1 |
| 819. bta-miR-2285ay<br>MIMAT0046355 | 21549                                      | -10.09                         | CCACTTACCCAGTTTGAGGGTTT<br>    :   :        <br>GGTTTTCCAAGTAAG-TCCCAA          | 1.45E-1 |
| 820. bta-miR-2285ce<br>MIMAT0046657 | 22027                                      | -7.44                          | CTGAAAAG--AAAGATGGTTTTT<br>:                <br>AGTTTTTCAAGTAAGTCCAAAAG         | 6.99E-2 |
| 821. bta-miR-6519<br>MIMAT0025537   | 24930                                      | -16.70                         | TTATAATTTACCTGCTGCTA<br>  :          <br>AAAGAGACAAGGGCGACGAT                   | 9.48E-2 |
| 822. bta-miR-2285ce<br>MIMAT0046657 | 25627                                      | -5.70                          | TCTAATGGTAATCTCTATGGTTTTA<br>    :              <br>AGTTTTTCA--AGTAAGTCCAAAAG   | 2.65E-1 |
| 823. bta-miR-2285av<br>MIMAT0046347 | 25659                                      | -7.70                          | CTTAAC--AAACAGAACTTTT<br>                 <br>TTTTTGGGCTTG-CTTGAAAA             | 7.54E-2 |
| 824. bta-miR-181d<br>MIMAT0009243   | 26996                                      | -9.30                          | CTATGGAGAAGGTTAATGAATGTG<br>    :            <br>TGGGTGGCT-GTTGTACTTACAA        | 1.75E-1 |
| 825. bta-miR-2285bb<br>MIMAT0046375 | 28048                                      | -12.10                         | AGGTAGACCTTA--TAACTTTA<br>  :   :     : :        <br>TCTTTTTGGGGTTGTTTGAAAG     | 2.5E-1  |
| 826. bta-miR-2285av<br>MIMAT0046347 | 28050                                      | -6.80                          | GTAGACCT-TAT-AACTTTA<br>  :     :   :        <br>TTTTTGGGCTTGCTTGAAAA           | 2.5E-1  |

| 1. miR Name                         | leftmost position of predicted target site | folding energy (in - Kcal/mol) | heteroduplex                                                                    | p value |
|-------------------------------------|--------------------------------------------|--------------------------------|---------------------------------------------------------------------------------|---------|
| 827. bta-miR-1271<br>MIMAT0009975   | 28064                                      | -10.70                         | TTTAAGCATTATTAATTGCCAAA<br>:       :          <br>ACTCATG-AATGATCCACGGTTC       | 2.5E-1  |
| 828. bta-miR-2285bb<br>MIMAT0046375 | 29371                                      | -9.10                          | TGAGAAATAATATCTAAACTTTA<br>    :     : :   :        <br>TCTTTTGGGGT-TGTTTGAAAG  | 3.85E-1 |
| 829. bta-miR-2285cq<br>MIMAT0046688 | 29371                                      | -7.30                          | TGAGAAATAATATCTAAACTTTA<br>    :     : :          <br>TCTTTTGG-ACCTTGTTTGAAAA   | 3.85E-1 |
| 830. bta-miR-2390<br>MIMAT0011943   | 29690                                      | -10.70                         | GGGGTACTGGTACAGACACAAC<br>    : :                <br>CCTTTTGTTTTGG--TGTGTTG     | 2.01E-1 |
| 831. bta-miR-28<br>MIMAT0009272     | 29966                                      | -17.20                         | CTCA--GGAAGGTCTGCTCCTA<br>      :              <br>GAGTTATCTGACACTCGAGGAA       | 2.01E-1 |
| 832. bta-miR-204<br>MIMAT0004338    | 30937                                      | -9.80                          | GCCGAACAAGTGCCCAAGGGAA<br>:                <br>TCCGTATCCTACTGTTTCCCTT           | 6.29E-2 |
| 833. bta-miR-2285ao<br>MIMAT0046360 | 2212                                       | -12.50                         | GCTCTTGCATTTGCATGGGTTT<br>    :     :            <br>CGGTTTTTCAAGCAGACCCAAA     | 2.61E-1 |
| 834. bta-miR-2285df<br>MIMAT0046729 | 2214                                       | -8.40                          | TCTTGCATTTGCATGGGTTTTA<br>  :     : :          <br>GGTTTTTCAGACAAGTCCAAAAA      | 2.61E-1 |
| 835. bta-miR-12039<br>MIMAT0046734  | 3453                                       | -12.90                         | AGTGATGCAGAACTGCCCTGT<br>                   <br>TCTCTTCTTCGGTCCCGGGACC          | 1.22E-2 |
| 836. bta-miR-329a<br>MIMAT0009288   | 3625                                       | -11.20                         | ACCTTATGTGATTGGCAGTGTGTT<br>:   :              <br>TTTTTCCAATTGGTC--CACACAA     | 3.34E-1 |
| 837. bta-miR-10b<br>MIMAT0003839    | 4284                                       | -13.40                         | ACCTGATGCGAGGAC-ACAGGGTA<br>:                    <br>GTGTTTAAGC-CAAGATGTCCCAT   | 1.75E-1 |
| 838. bta-miR-140<br>MIMAT0003789    | 7779                                       | -10.50                         | GCCTAATATGCATGTTGTGGTA<br>  : :            <br>AGGCACCAAGATGGGACACCAT           | 8.64E-2 |
| 839. bta-miR-2480<br>MIMAT0012072   | 10531                                      | -6.70                          | GTT-CAGGATTATATACAAT<br>    :   :            <br>CAGTATTCTTTGTTATGTTA           | 8.51E-2 |
| 840. bta-let-7c MIMAT0004332        | 11441                                      | -10.90                         | TTTTGTATTTTACAGATATACCTCA<br>:     :              <br>TTGGTATG--TTG-GATGATGGAGT | 8.26E-2 |

| 1. miR Name                          | leftmost position of predicted target site | folding energy (in - Kcal/mol) | heteroduplex                                                                                   | p value |
|--------------------------------------|--------------------------------------------|--------------------------------|------------------------------------------------------------------------------------------------|---------|
| 841. bta-miR-376c<br>MIMAT0009947    | 12447                                      | -6.77                          | ATGGCAGATTCAAACATATCCAA<br>: :                  <br>ATTTGTATCTTCCTTATAGGTG                     | 2.14E-1 |
| 842. bta-miR-2471-3p<br>MIMAT0012062 | 16143                                      | -15.10                         | CGTTGTGGCAGTT-GCATCAGA<br>  :          :            <br>TCGTC-CCGACAGAAGTAGTCT                 | 5.43E-2 |
| 843. bta-miR-2480<br>MIMAT0012072    | 16547                                      | -11.60                         | TGCATCAGCAACAATACAAG<br>                           <br>CAGTATTCTTTGTTATGTTA                    | 2.36E-2 |
| 844. bta-miR-2480<br>MIMAT0012072    | 17045                                      | -5.80                          | ATTGTGTGAAAAAGCATACAAA<br>  :                     <br>CAGTATTCTTT - - GTTATGTTA                | 2.54E-1 |
| 845. bta-miR-329a<br>MIMAT0009288    | 17308                                      | -13.50                         | AATTGCCAGCACCACGTGTGTT<br>                       <br>TTTTTCCAATTGGTCCACACAA                    | 3.52E-1 |
| 846. bta-miR-2418<br>MIMAT0011982    | 18337                                      | -15.10                         | AACAATTTAAGCATCTCATCCCT<br>:                        <br>GCTGGTGCGGTGT-GAGTAGGGT                | 3.39E-1 |
| 847. bta-miR-2310<br>MIMAT0011822    | 19875                                      | -10.60                         | GTTTACATTTCCACGACAAAAG<br>     :      :            <br>TCTTTGTTTGGGT-TTGTTTTG                  | 3.48E-1 |
| 848. bta-miR-2285df<br>MIMAT0046729  | 21153                                      | -6.20                          | TTTGCATTTTGGAC-GGTTTTTC<br>  :                    <br>GGTTTTTCAGACAAGTCCAAAAA                  | 2.01E-1 |
| 849. bta-miR-2285df<br>MIMAT0046729  | 21188                                      | -9.60                          | TGCTTCTTCTAGTGAAGGGTTTTT<br>        :                  <br>GGTTTTTCAGA-CA-AGTCCAAAAA           | 2.01E-1 |
| 850. bta-miR-2285df<br>MIMAT0046729  | 22028                                      | -6.14                          | TGAAAAG - - AAAGATGGTTTTT<br>                          <br>GGTTTTTCAGACAAGTCCAAAAA             | 6.99E-2 |
| 851. bta-miR-2285ao<br>MIMAT0046360  | 22109                                      | -10.31                         | GCTAG-CTATGATTATGGGTTA<br>   :   :                  <br>CGGTTTTTCAAGCAGACCCAAA                 | 3.48E-1 |
| 852. bta-miR-12039<br>MIMAT0046734   | 22525                                      | -11.84                         | GGACCTTAATCC - - TGCCCTGT<br>:                           <br>TCTCTTCTTCGGTCCCGGGACC            | 3.66E-1 |
| 853. bta-miR-2292<br>MIMAT0011800    | 24731                                      | -19.80                         | TGTCTTTTATTCAG - - GCAGACTC<br>   :      : :      :            <br>ACGGAAG - - GAGTTAGAGTCTGAG | 1.75E-1 |
| 854. bta-miR-15a<br>MIMAT0004334     | 24760                                      | -12.10                         | TGTAATAATATTGATGCTGCTA<br>   :                        <br>TGTTTGGTAATAC-ACGACGAT               | 1.75E-1 |

| 1. miR Name                            | leftmost position of predicted target site | folding energy (in - Kcal/mol) | heteroduplex                                                                | p value |
|----------------------------------------|--------------------------------------------|--------------------------------|-----------------------------------------------------------------------------|---------|
| 855. bta-miR-2285ah-5p<br>MIMAT0040945 | 25271                                      | -21.70                         | CAGGGCCTTACAAGTGCCCCCAA<br>   :     :     <br>AGGACGGG-TGGAGATGGGGGTT       | 1.04E-1 |
| 856. bta-miR-2285df<br>MIMAT0046729    | 25628                                      | -8.70                          | CTAATGGTAATCTCTATGGTTTTA<br> :    :           <br>GGTTTTTCAGACAAG--TCCAAAAA | 2.65E-1 |
| 857. bta-miR-2284f<br>MIMAT0011905     | 25656                                      | -6.00                          | CTACTTAACAAAACAGAACTTT<br>         <br>CTTTTTAGGCTTG-CTTGAAA                | 7.54E-2 |
| 858. bta-miR-2418<br>MIMAT0011982      | 27754                                      | -15.10                         | TCCTGACGATATATTACATCCCT<br>    : :       <br>GCTGGTGCGGTGTGA-GTAGGGT        | 2.11E-1 |
| 859. bta-miR-320b<br>MIMAT0011991      | 29660                                      | -17.82                         | TGCACC-AGGAGTCCCAGCT<br>         <br>TGGTGGGAGAGTTGGGTCTGA                  | 2.69E-1 |
| 860. bta-let-7c MIMAT0004332           | 30054                                      | -15.00                         | GGCAACAGAACCCCTACCTCT<br>            <br>TTGGTATGTTGGATGATGGAGT             | 2.94E-1 |
| 861. bta-miR-11995<br>MIMAT0046648     | 30666                                      | -13.30                         | AGAGAGTTGACTGCAGAGGACAT<br>  :          <br>TCTGTGCGACT-CTTCATCCTGTT        | 1.28E-1 |
| 862. bta-miR-12018<br>MIMAT0046701     | 397                                        | -12.40                         | CGCCGAC-TTCTTAAACAAGAG<br>        :      <br>AGTTCTGTAAGAGCCTGTTCTA         | 1.45E-1 |
| 863. bta-miR-2297<br>MIMAT0011805      | 400                                        | -7.30                          | CGACTTCTTAAACAAGAGTG<br>         <br>TCCTTATTCTTTTTTCTCAC                   | 1.45E-1 |
| 864. bta-miR-17-3p<br>MIMAT0003816     | 1122                                       | -10.40                         | ACGTTATGTTATGAGACTGCAGA<br>  :   :      <br>TGT-TCACGG--AAGTGACGTCA         | 1.69E-1 |
| 865. bta-miR-2285bv<br>MIMAT0046642    | 2873                                       | -10.60                         | ACACTGCATGT-GGAGTGTTTG<br>            <br>TTTTACAAACAAGCTCACAAAA            | 1.36E-1 |
| 866. bta-miR-2285cb<br>MIMAT0046651    | 3493                                       | -14.40                         | TTGCAGGATC-TTTGGGTGTT<br> :     :      <br>GGTTTTCAAGTAGGCCACAA             | 2.58E-1 |
| 867. bta-miR-655<br>MIMAT0009360       | 5904                                       | -5.20                          | TAAGTATTATACTCAGCGTATTAT<br>           <br>TCTCTCCAATTG-GT-ACATAATA         | 6.48E-2 |
| 868. bta-miR-2455<br>MIMAT0012037      | 6905                                       | -12.10                         | CTTTTGTGGTAAGATCGCACAGT<br>:::   : :         <br>AGGGACGGAGGGGCT--CGTGTCT   | 2.28E-1 |

| 1. miR Name                          | leftmost position of predicted target site | folding energy (in - Kcal/mol) | heteroduplex                                                                                          | p value |
|--------------------------------------|--------------------------------------------|--------------------------------|-------------------------------------------------------------------------------------------------------|---------|
| 869. bta-miR-1721<br>MIMAT0011849    | 9587                                       | -7.80                          | TTTGTTCGCTATATATATCTGTT<br>: :    :         <br>AGAGTCTTAGTGTA - GTAGACAC                             | 6.88E-2 |
| 870. bta-miR-17-3p<br>MIMAT0003816   | 9632                                       | -11.90                         | GGGTATTTTCTTACTGCAGA<br>:   :           <br>TGTTACGGAAGTGACGTCA                                       | 2.73E-1 |
| 871. bta-miR-2437<br>MIMAT0012011    | 10296                                      | -11.90                         | TGCTTATAACGGCAAACCACA<br>    : :            <br>TTTCCTTTTGTTTTTTGGTGT                                 | 3.62E-1 |
| 872. bta-miR-2285cd<br>MIMAT0046655  | 10498                                      | -15.10                         | CCTTATAAGGATGCTCAGGTTGTC<br>              : :            <br>GG - TTTTCAAGTAGGTCCAACAA                | 8.51E-2 |
| 873. bta-miR-1721<br>MIMAT0011849    | 10531                                      | -19.80                         | G TTCAGGATTATATACAATCTGTT<br>:       :     :          <br>AGAGTCTTAGTGTA - - GTAGACAC                 | 8.51E-2 |
| 874. bta-miR-6119-5p<br>MIMAT0024588 | 11443                                      | -7.50                          | TTGTATTTTCACAGATATACCTCA<br>:                          <br>TCAGTTTAGTTAAAAAATGGAGA                    | 8.26E-2 |
| 875. bta-miR-2285cd<br>MIMAT0046655  | 12827                                      | -9.60                          | ACCTTTATTTTGTAAGGTTGTA<br>                      <br>GGTTTTTCAAGTA - GGTCCAACAA                        | 3.34E-1 |
| 876. bta-miR-2285cd<br>MIMAT0046655  | 13751                                      | -8.30                          | TCTCTCTATATATGCTGGTTGTG<br>:               <br>GGTTTTTCAAGTAGGTCCAACAA                                | 1.32E-1 |
| 877. bta-miR-532<br>MIMAT0003848     | 13905                                      | -11.70                         | GTGGAGGTAGGCTTAGTAGGCATT<br>   :     :          <br>TGCCAGGATGTGAGT - - TCCGTAC                       | 3.29E-1 |
| 878. bta-miR-2285cb<br>MIMAT0046651  | 13979                                      | -10.54                         | CTATGTTATTGCAGCCCCAGGGTGTG<br>  :                           <br>GGT - - TTTCAAGT - - AGG - CCCACAA    | 3.48E-1 |
| 879. bta-miR-12003<br>MIMAT0046662   | 15735                                      | -17.10                         | GAATTCTGTTCAACATACAATGCT<br>    :     :                           <br>CTTG - GATACCGGTTG - - GGTTACGA | 1.15E-2 |
| 880. bta-miR-628<br>MIMAT0009356     | 16537                                      | -8.40                          | AGCAGAGT - TATGCATCAGCAA<br>          :               <br>GGAGATCATTTATACAGTCGTA                      | 2.36E-2 |
| 881. bta-miR-30c<br>MIMAT0003850     | 17150                                      | -6.70                          | CACTCGTAAGTA - TGTGTTTACT<br>       :            <br>CGACTCTCACATCCTACAAATGT                          | 3.39E-1 |
| 882. bta-miR-582<br>MIMAT0009351     | 19033                                      | -9.20                          | TGTG - TATGTTTTGGAAGTGTAA<br>   :               :            <br>TCATTGACCAACTTGTGACATT               | 2.42E-1 |

| 1. miR Name                         | leftmost position of predicted target site | folding energy (in - Kcal/mol) | heteroduplex                                                          | p value |
|-------------------------------------|--------------------------------------------|--------------------------------|-----------------------------------------------------------------------|---------|
| 883. bta-miR-2285bn<br>MIMAT0046625 | 19389                                      | -8.91                          | ACAG-CTACTACAGCAGGTTTT<br>   :      <br>TGTTTTTCAAGTAAGTCCAAAA        | 3.12E-1 |
| 884. bta-miR-190b<br>MIMAT0009252   | 19600                                      | -7.70                          | TTATTAATAATACAACATATCC<br>::   :       <br>TTGGGTTATAGT-TTGTATAGT     | 5.58E-3 |
| 885. bta-miR-2297<br>MIMAT0011805   | 20406                                      | -10.70                         | AAGAGTGGTGGTAGTAAGAGTG<br>  : :: :      <br>TCCTTATT-CT-TTTTTCTCAC    | 2.21E-1 |
| 886. bta-miR-2285bv<br>MIMAT0046642 | 20410                                      | -12.00                         | GTGGTGGTAGTAAGAGTGTTTG<br>::           <br>TTTTACAAACAAGCTCACAAAA     | 2.21E-1 |
| 887. bta-miR-148b<br>MIMAT0003814   | 20414                                      | -12.60                         | TGGTAGTAAGAGTGTTCACACTGT<br>             <br>TGTTTCA-AGACAC-TACGTGACT | 2.21E-1 |
| 888. bta-miR-12003<br>MIMAT0046662  | 23218                                      | -11.80                         | TGATTCACGGTGGA-ACAATGCC<br>  :       <br>CTTGGATACCGTTGGGTACGA        | 1.89E-1 |
| 889. bta-miR-2285bv<br>MIMAT0046642 | 25024                                      | -6.40                          | CCTCAACCTGT--AGGTGTTTT<br>   :      <br>TTTTACAAACAAGCTCACAAAA        | 2.46E-1 |
| 890. bta-miR-12003<br>MIMAT0046662  | 26689                                      | -10.30                         | ATTGCTAATGCATTTAACAATGCT<br>            <br>CTTGGATACCG-GTTGGGTACGA   | 1.72E-1 |
| 891. bta-miR-12018<br>MIMAT0046701  | 26839                                      | -9.60                          | ATAAGTTCCTTCTT-TACAAGAA<br>:       :      <br>AGTTCTGTAAGAGCCTGTTCTA  | 3.25E-1 |
| 892. bta-miR-2297<br>MIMAT0011805   | 27361                                      | -7.90                          | CATGATTTTAAGGAAGAGTT<br>  :       <br>TCCTTATTCTTTTTTCTCAC            | 1.61E-2 |
| 893. bta-miR-12003<br>MIMAT0046662  | 27821                                      | -13.20                         | ATTATAATAGCTA-CCACAATGCC<br>  :          <br>CTTGGATACCGTTGG-GTTACGA  | 2.25E-1 |
| 894. bta-miR-2437<br>MIMAT0012011   | 28635                                      | -8.60                          | TTACAACGATGTAAAACCACC<br>: ::      <br>TTTCCTTTTGTTTTTTGGTGT          | 1.78E-1 |
| 895. bta-miR-2374<br>MIMAT0011920   | 30205                                      | -25.36                         | CCCGCCAGAAGAGGAGCCCCAA<br>           <br>GGGCGG-AGAGGGGTCGGGGTT       | 5.91E-3 |
| 896. bta-miR-12018<br>MIMAT0046701  | 30526                                      | -7.90                          | TGAATGCATATCAACAACAAGAT<br>:            <br>AGTTCTGTA-AGAGCCTGTTCTA   | 2.11E-1 |



| 1. miR Name                         | leftmost position of predicted target site | folding energy (in - Kcal/mol) | heteroduplex                                                                      | p value |
|-------------------------------------|--------------------------------------------|--------------------------------|-----------------------------------------------------------------------------------|---------|
| 897. bta-miR-17-3p<br>MIMAT0003816  | 30663                                      | -11.60                         | AGTAGAGAGTTGACTGCAGA<br>         <br>TGTTACCGGAAGTGACGTCA                         | 1.28E-1 |
| 898. bta-miR-6529b<br>MIMAT0029947  | 266                                        | -17.80                         | GGATGTTTGAGGACGCAGAGG<br>         <br>TCTCTAGTCTCC-GCGTCTCA                       | 3.03E-1 |
| 899. bta-miR-29e<br>MIMAT0009953    | 479                                        | -10.90                         | AGGTGCT-ACTTCAA--GATGCTT<br>:          <br>TTTGTGACTAAAGTTTACTACGAT               | 3.03E-1 |
| 900. bta-miR-6529b<br>MIMAT0029947  | 1125                                       | -14.10                         | TTATGTTATGAGACTGCAGAGT<br>:   :       :          <br>TCTCTAGT-CTC-CGCGTCTCA       | 1.69E-1 |
| 901. bta-miR-2469<br>MIMAT0012059   | 2783                                       | -15.30                         | AGG-AACAG--CCTACAGTAA<br>  :                  <br>TTCGGCGTCCGGGATGTCATT           | 2.9E-1  |
| 902. bta-miR-2284k<br>MIMAT0011907  | 3982                                       | -6.20                          | TTTTCAATGACT--ACTTTTG<br>:     :          <br>TTTTTGGGCTGGCTTGAAAAG               | 2.11E-1 |
| 903. bta-miR-2284k<br>MIMAT0011907  | 5797                                       | -9.60                          | AAAAATTTGAAACAACTTTTA<br>        : :            <br>TTTTTGGGCT-GGCTTGAAAAG        | 2.39E-2 |
| 904. bta-miR-2469<br>MIMAT0012059   | 7067                                       | -13.80                         | AAGCCATTGATGTAGTACAGTAT<br>        :          <br>TTCGG--CGTCCGGGATGTCATT         | 2.42E-1 |
| 905. bta-miR-2285bs<br>MIMAT0046637 | 7749                                       | -8.20                          | TAATTTGCTACATTCTAAGGTTAA<br>      :          <br>GGTTTTTCAAGTAGG--TCCAATC         | 2.98E-1 |
| 906. bta-miR-767<br>MIMAT0009375    | 8174                                       | -13.10                         | AAAGTTGTAATAACT-TGGTGCC<br>  :   :     :          <br>GTACGAGTCTGTTGGTACCACGT     | 3.62E-1 |
| 907. bta-miR-484<br>MIMAT0003535    | 9258                                       | -10.00                         | GTTTAAAGGTTTAGCACAGCCTGT<br>      :          <br>TAGCCCTCC--CCTGACTCGGACT         | 2.28E-1 |
| 908. bta-miR-2284k<br>MIMAT0011907  | 9693                                       | -6.00                          | AATGGCTCTTACT--ACTTTTA<br>: :   :     :          <br>TTTTTGGG-CTGGCTTGAAAAG       | 1.98E-1 |
| 909. bta-miR-29e<br>MIMAT0009953    | 10488                                      | -8.50                          | TTTTTATGGTCCTTATAAGGATGCTC<br>    :     :          <br>TTTGTGACTA-AAGT-TTACTACGAT | 8.51E-2 |
| 910. bta-miR-2285bs<br>MIMAT0046637 | 11394                                      | -5.80                          | ATCTATGGCTGCAGCAAAGGTTAT<br>:                  <br>GGTTTTTC-AAGT-AGGTCCAATC       | 1.15E-2 |

| 1. miR Name                      | leftmost position of predicted target site | folding energy (in - Kcal/mol) | heteroduplex                                                                      | p value |
|----------------------------------|--------------------------------------------|--------------------------------|-----------------------------------------------------------------------------------|---------|
| 911. bta-let-7b MIMAT0004331     | 11446                                      | -14.10                         | TATTTACAG - -ATATACCTCA<br>  :     :      <br>TTGGTGTGTTGGATGATGGAGT              | 8.26E-2 |
| 912. bta-miR-2364 MIMAT0011902   | 11975                                      | -16.80                         | CTGTTTTCAGGC - TTTACAGAGT<br>    : :      : :      <br>GACG - GGTGTAGGTAGGTGTCTCT | 2.39E-1 |
| 913. bta-miR-424-3p MIMAT0015304 | 13464                                      | -8.40                          | AAAGTTAATTGCTGC - CGTTTTTC<br>   : :    :        <br>TATCG - -TCGCGGAGTGCAAAAC    | 3.76E-1 |
| 914. bta-miR-6529b MIMAT0029947  | 16083                                      | -15.70                         | AGAAGTGCAGTTATGCAGAGT<br>          :      <br>TCTCTA - GTCTCCGCGTCTCA             | 3.52E-1 |
| 915. bta-miR-2285bf MIMAT0046382 | 16217                                      | -6.10                          | TAAATATGTTT - TGAGTGTTTC<br>:              <br>GTTT - TTCAAACAAGCACAAAA           | 1.69E-1 |
| 916. bta-miR-2285bf MIMAT0046382 | 17149                                      | -5.80                          | CCACTCGTAAGTATGTGTTTA<br>      :      <br>GTTTTTCAAACAAGCACAAAA                   | 3.39E-1 |
| 917. bta-miR-2477 MIMAT0012069   | 19151                                      | -13.80                         | TGTTA - AC - AAACATGCATTCCAC<br>:    :            <br>GCAGTCTGAATAGTA - GTAAGGTG  | 3.16E-1 |
| 918. bta-miR-29e MIMAT0009953    | 19250                                      | -14.70                         | GTATATGGATGGCA - TGGATGCTA<br>  :   :             <br>TTTGTGACTAAAGTTTACTACGAT    | 2.46E-1 |
| 919. bta-miR-370 MIMAT0009300    | 19260                                      | -13.20                         | GGCATGG - -ATGCT - AAGCAGGT<br>:       : :      <br>TGGT - CCAAGGTGGGGTCGTCCG     | 2.46E-1 |
| 920. bta-miR-484 MIMAT0003535    | 20024                                      | -13.20                         | CAGCCAATTCGAC - -AGCCTGA<br>         <br>TAGCCCTCCCCTGACTCGGACT                   | 7.09E-2 |
| 921. bta-miR-2477 MIMAT0012069   | 21276                                      | -8.20                          | TATTTGTTTGGAGAAATTCAC<br>:    :      <br>GCAGTCTGAATAGTAGTAAGGTG                  | 7.65E-2 |
| 922. bta-miR-2469 MIMAT0012059   | 21460                                      | -10.90                         | TTTTTGTTGGT - -GACAGTAT<br>: :   :    :      <br>TTCGGCGTCCGGGATGTCATT            | 1.45E-1 |
| 923. bta-miR-484 MIMAT0003535    | 21656                                      | -13.50                         | TGCTATGCTGGATATTCAGCCTGA<br>    :      <br>TAGCCCTCCCCTG - -ACTCGGACT             | 2.25E-1 |
| 924. bta-miR-767 MIMAT0009375    | 22006                                      | -12.40                         | TTGAAATAGTTAAGCT - TGGTGCT<br>:      :      <br>GTACGAGTC - TGTGGTACCACGT         | 6.99E-2 |

| 1. miR Name                          | leftmost position of predicted target site | folding energy (in - Kcal/mol) | heteroduplex                                                                      | p value |
|--------------------------------------|--------------------------------------------|--------------------------------|-----------------------------------------------------------------------------------|---------|
| 925. bta-miR-7862<br>MIMAT0030442    | 24531                                      | -13.70                         | AACACTATCTA - - TAGCACCA<br>  :       <br>CGAGTCGAGGTCCCTCGTGGT                   | 5.76E-2 |
| 926. bta-miR-29e<br>MIMAT0009953     | 24753                                      | -9.50                          | ATTTACTTGTAAATAATATTGATGCTG<br>:    :  :        <br>TTTGTGACTAAAGTT - - TACTACGAT | 1.75E-1 |
| 927. bta-miR-2285bf<br>MIMAT0046382  | 25023                                      | -6.60                          | GCCTCAACCTGTAGGTGTTTT<br>         <br>GTTTTTCAAACAAGCACAAAA                       | 2.46E-1 |
| 928. bta-miR-11987<br>MIMAT0046387   | 26566                                      | -23.80                         | ACCTCTGCTAGTCTGTTTCCTCC<br>       :          <br>TGGAGGTGGTC - - TCTAAGGAGC       | 3.46E-2 |
| 929. bta-miR-2285ct<br>MIMAT0046695  | 28048                                      | -7.10                          | AGGTAGA - CC - TTATAACTTTA<br>  :  :          <br>TCTTTTAGGTTTGATTGAAAG           | 2.5E-1  |
| 930. bta-miR-6529b<br>MIMAT0029947   | 29624                                      | -12.90                         | GGAG - TTTGAATTTGCAGAGG<br>:       :   <br>TCTCTAGTCT - CCGCTCTCA                 | 8.64E-2 |
| 931. bta-miR-2299-3p<br>MIMAT0011808 | 29851                                      | -19.30                         | AGGCTGATGTCAATACCCCGGC<br>       :           <br>TGCGAC - CTAGGTAAGGGGCCT         | 1.98E-1 |
| 932. bta-miR-2392<br>MIMAT0011945    | 29992                                      | -19.20                         | GATCTACTTCACGCGCATCCAG<br>  :           <br>ACGTGGGGAGTGGGGGTAGGTA                | 2.01E-1 |
| 933. bta-let-7b MIMAT0004331         | 30054                                      | -19.30                         | GGCAACAGAAC - CCTACCTCT<br>: :                <br>TTGGTGTGTTGGATGATGGAGT          | 2.94E-1 |
| 934. bta-miR-2469<br>MIMAT0012059    | 30460                                      | -8.80                          | GTGCAATTAGATTTGACAGTAC<br>   :   :      <br>TTCG - GCGTCCGGGATGTCATT              | 3.29E-1 |
| 935. bta-miR-29d-3p<br>MIMAT0009275  | 2236                                       | -13.70                         | TTTCATGTTTTGCATGGTGCTT<br>:    : :      <br>ATTAGCTAAAGTTTACCACGAT                | 2.61E-1 |
| 936. bta-miR-23a<br>MIMAT0003827     | 3655                                       | -17.10                         | TGGAAATGC - ATTAAATGTGAT<br>              <br>ACCTTTAGGGACCGTTACACTA              | 3.34E-1 |
| 937. bta-miR-29d-3p<br>MIMAT0009275  | 6787                                       | -12.30                         | AGTGTGGTTGCTAGA - GGTGCTT<br>: :   : :       <br>ATTAGCTAA - AGTTTACCACGAT        | 3.52E-1 |
| 938. bta-miR-11979<br>MIMAT0046367   | 8176                                       | -9.50                          | AGTTGTAATAAC - - TTGGTGCC<br>        :         <br>TCCTCACTGGTGCCACCACGT          | 3.62E-1 |

| 1. miR Name                            | leftmost position of predicted target site | folding energy (in - Kcal/mol) | heteroduplex                                                                   | p value |
|----------------------------------------|--------------------------------------------|--------------------------------|--------------------------------------------------------------------------------|---------|
| 939. bta-miR-302c<br>MIMAT0009281      | 8794                                       | -10.30                         | TATGGTTACCATGTGTTGCACTTT<br>            <br>GGTGACTTTGTAC-CTTCGTGAAT           | 1.54E-1 |
| 940. bta-miR-302c<br>MIMAT0009281      | 8811                                       | -9.50                          | GCACTTTATTACA--CATGCACTTT<br>               <br>GGTGA--CTTTGTACCTTCGTGAAT      | 1.54E-1 |
| 941. bta-miR-301a<br>MIMAT0009276      | 8905                                       | -15.80                         | GTGCTTT-CCTCTGCT--TGCACTA<br>:         :         <br>TACGAAACTGTTATGATAACGTGAC | 2.69E-1 |
| 942. bta-miR-2285ak-5p<br>MIMAT0040948 | 8943                                       | -8.70                          | TGG-TAGTCC--AC-AACCTTA<br>                <br>TCCTTTTGGGCTTGCTTGGAAA           | 3.62E-1 |
| 943. bta-miR-11979<br>MIMAT0046367     | 9301                                       | -16.70                         | GCTAGT-TCCATTGCTGGTGCT<br>         :        <br>TCCTCACTGGTGCCCAACACGT         | 2.28E-1 |
| 944. bta-miR-487a<br>MIMAT0003805      | 9697                                       | -6.94                          | GCTCTTACTACTTTTATGATT<br>:      :        <br>TGACCTACAGGGACATACTAA             | 1.98E-1 |
| 945. bta-let-7e MIMAT0004333           | 11442                                      | -11.40                         | TTTGTATTTACAGATATACCTCA<br>:   :    :         <br>TGATATG--TTG-GAGGATGGAGT     | 8.26E-2 |
| 946. bta-miR-98<br>MIMAT0003809        | 11446                                      | -10.70                         | TATTTACAG--ATATACCTCA<br>    :      <br>TTGTTATGTTGAATGATGGAGT                 | 8.26E-2 |
| 947. bta-miR-302c<br>MIMAT0009281      | 11800                                      | -9.90                          | TTGTGGCAATATTGTAGCACTTT<br>   :           <br>GGTGACTTTGTACCTTCGTGAAT          | 6.2E-2  |
| 948. bta-miR-487a<br>MIMAT0003805      | 14022                                      | -6.70                          | TCTTATTATTCTTATATGATG<br>  : :        <br>TGACCTACAGGGACATACTAA                | 2.42E-1 |
| 949. bta-miR-1287<br>MIMAT0009971      | 14418                                      | -23.50                         | CTTTTATATGCTGCTGATCCAGCT<br>:   :        <br>CTGAGT--TTGGTGACTAGGTCGT          | 7.54E-2 |
| 950. bta-miR-2318<br>MIMAT0011841      | 15733                                      | -7.10                          | ATGAATTCTGTTCAACATACAA<br>:             <br>CCAGTCTATTAAGT--AGTATGTG           | 1.15E-2 |
| 951. bta-miR-23a<br>MIMAT0003827       | 16249                                      | -8.60                          | GTAACGCACCAGG--ATGTGAT<br>          <br>ACCTTTAGGGACCGTTACACTA                 | 1.36E-1 |
| 952. bta-miR-2318<br>MIMAT0011841      | 17044                                      | -5.30                          | CATTGTGTGAAAAAGCATACAA<br>:   :        <br>CCAGTCTATTAAGTAGTATGTG              | 2.54E-1 |

| 1. miR Name                         | leftmost position of predicted target site | folding energy (in - Kcal/mol) | heteroduplex                                                                 | p value |
|-------------------------------------|--------------------------------------------|--------------------------------|------------------------------------------------------------------------------|---------|
| 953. bta-miR-2285d<br>MIMAT0011815  | 19260                                      | -10.70                         | GGCATGGATGCTAAGCAGGTTG<br>      :            <br>CGGTTTTTAAAGCAAGTCCAAA      | 2.46E-1 |
| 954. bta-miR-2318<br>MIMAT0011841   | 20362                                      | -9.00                          | TTTCATACGACTCCAGCATACAC<br>                   <br>CCAGTCTATTAAG- TAGTATGTG   | 1.89E-1 |
| 955. bta-miR-29d-3p<br>MIMAT0009275 | 21298                                      | -12.00                         | CAGTTTGGAAACGGG- GGTGCTT<br>  : :          <br>ATTAGCTAAAGTTTACCACGAT        | 7.65E-2 |
| 956. bta-miR-2285bd<br>MIMAT0046379 | 21554                                      | -9.10                          | TACCCAGTTTG- -AGGGTTT<br>      : :          <br>GTTTTTCAAGTAGTCCAAA          | 1.45E-1 |
| 957. bta-miR-11979<br>MIMAT0046367  | 22010                                      | -8.90                          | AATAGT- TAAGC- - TTGGTGCT<br>      :          <br>TCCTCACTGGTGCCACCACGT      | 6.99E-2 |
| 958. bta-miR-669<br>MIMAT0013838    | 22083                                      | -12.50                         | TTTGAATAT- AATCCACCCACT<br>  :              <br>GTGCGTGTACGTGTGTGGGTGT       | 3.48E-1 |
| 959. bta-miR-487a<br>MIMAT0003805   | 22101                                      | -8.60                          | ACTGATAAGCTAGCTATGATT<br>        :          <br>TGACCTACAGGGACATACTAA        | 3.48E-1 |
| 960. bta-miR-215<br>MIMAT0003797    | 22616                                      | -7.40                          | AATTACACAG- GCGAAGGTCAA<br>    :   :          <br>ACAGACAGTTAAGTATCCAGTA     | 1.86E-1 |
| 961. bta-miR-2288<br>MIMAT0011795   | 23290                                      | -11.80                         | TTTTCGTAATTCTACTACCA<br>:   : :   :          <br>TTTGGTGTGTGGATGATGGA        | 2.01E-1 |
| 962. bta-miR-2288<br>MIMAT0011795   | 23827                                      | -11.80                         | TTGCTTAATGGTTACTACCC<br>:   :   : :          <br>TTTGGTGTGTGGATGATGGA        | 2.86E-1 |
| 963. bta-miR-23a<br>MIMAT0003827    | 24228                                      | -7.40                          | GCGTAATTTACATATGATGTGAA<br>        :          <br>ACCTTTAGGG- -ACCGTTACACTA  | 1.36E-1 |
| 964. bta-miR-23a<br>MIMAT0003827    | 25868                                      | -7.00                          | GTGTTGTTC- -AAACATGTGAT<br>:   :            <br>ACCTTTAGGGACCGTTACACTA       | 1.98E-1 |
| 965. bta-miR-23a<br>MIMAT0003827    | 27766                                      | -12.10                         | ATTACATCCCTTCAATCATGTGAA<br>                   <br>ACCTTTAGGGA- -CCGTTACACTA | 2.11E-1 |
| 966. bta-miR-26b<br>MIMAT0003531    | 29046                                      | -6.40                          | AACCCAGAAACAAACAACCTTGAT<br>                   <br>TTGG- ATAGGACTTAATGAACTT  | 3.15E-2 |

| 1. miR Name                         | leftmost position of predicted target site | folding energy (in - Kcal/mol) | heteroduplex                                                                                | p value |
|-------------------------------------|--------------------------------------------|--------------------------------|---------------------------------------------------------------------------------------------|---------|
| 967. bta-miR-23a<br>MIMAT0003827    | 29197                                      | -10.70                         | CAGATTG GCC - AGCTTATGTGAC<br>                  <br>ACCTTTAGGGACCG - TTACACTA               | 2.11E-1 |
| 968. bta-miR-2410<br>MIMAT0011968   | 29509                                      | -13.60                         | CCAGGGGT - - AGAAGAGCTCAA<br>   :                 <br>AGTGTCCAGGAGGAGTCGAGTC                | 7.91E-3 |
| 969. bta-miR-98<br>MIMAT0003809     | 30052                                      | -13.10                         | CTGGCAACAGAACCCCTACCTCT<br>     :                <br>TTGTTATGTT - GAATGATGGAGT              | 2.94E-1 |
| 970. bta-let-7e MIMAT0004333        | 30055                                      | -20.30                         | GCAACAGAACC - CCTACCTCT<br>                   <br>TGATATGTTGGAGGATGGAGT                     | 2.94E-1 |
| 971. bta-miR-301a<br>MIMAT0009276   | 30215                                      | -12.10                         | GAGGAGCCCCAATAACAATGCACTG<br>                   <br>TACGAAACTGTTAT - GATAACGTGAC            | 5.91E-3 |
| 972. bta-miR-669<br>MIMAT0013838    | 30333                                      | -20.80                         | CTTG CAGA - ACTCGCACCCACA<br>:          :              <br>GTGCGTGTACGTGTGTGGGTGT           | 4.98E-2 |
| 973. bta-miR-11979<br>MIMAT0046367  | 30341                                      | -15.70                         | ACTCGCACCCACAGCTGGTGCG<br>                   <br>TCCTCACTGGTGCCACCACGT                      | 4.98E-2 |
| 974. bta-miR-2290<br>MIMAT0011798   | 267                                        | -11.50                         | GATGTTTGAGGACGCAGAGGA<br>:                   <br>TGTTTGGCTGGTG - GTCTCCG                    | 3.03E-1 |
| 975. bta-miR-12058<br>MIMAT0046765  | 3106                                       | -12.50                         | GATGATGACTTTCTTGAAGAAA<br>                   <br>CGTGTACTGA - TGACCTTCTTG                   | 1.72E-1 |
| 976. bta-miR-449b<br>MIMAT0009321   | 3450                                       | -18.50                         | GGCAGTGATGCAG - AAAGTGCCC<br>      : :   :          <br>CGGTCG - ATTGTTATGTGACGGA           | 1.22E-2 |
| 977. bta-miR-2450a<br>MIMAT0012030  | 3454                                       | -15.80                         | GTGATGCA - - GAAAGTGCCCT<br>                   <br>GTGTACGTGGAGATGACGGGT                    | 1.22E-2 |
| 978. bta-miR-369-3p<br>MIMAT0003802 | 5904                                       | -8.20                          | TAAGTATTATACTCAGCGTATTATT<br>        :                <br>TTTC - TAGT - TG - GT - ACATAATAA | 6.48E-2 |
| 979. bta-miR-11993<br>MIMAT0046634  | 6064                                       | -21.10                         | ACTGAGTGGCCAACAGCTACAGGTG<br>                   <br>GTACTCACATGT - - GCG - TGTCCAG          | 4.26E-2 |
| 980. bta-miR-93<br>MIMAT0003837     | 8812                                       | -12.30                         | CAC TTTATTACACATGCACTTTC<br>                   <br>ATGGACGTGCTTGT - CGTGAAAC                | 1.54E-1 |

| 1. miR Name                         | leftmost position of predicted target site | folding energy (in - Kcal/mol) | heteroduplex                                                                | p value |
|-------------------------------------|--------------------------------------------|--------------------------------|-----------------------------------------------------------------------------|---------|
| 981. bta-miR-2420<br>MIMAT0011987   | 8940                                       | -12.00                         | CGATGGTAGTC-CACAACCT<br>: :    :        <br>TTTCTTATTTGTGTGTTGGA            | 3.62E-1 |
| 982. bta-miR-12028<br>MIMAT0046721  | 10049                                      | -18.60                         | ATAAGGTCTACTGTCCCAGACA<br>: :         <br>TCTCTTAG-CCCCAGGGTCTGT            | 1.75E-1 |
| 983. bta-miR-12058<br>MIMAT0046765  | 11320                                      | -8.50                          | GGTTCTAACTTAGAGGAAGAAA<br>         <br>CGTGTACTGA-TGACCTTCTTG               | 2.73E-1 |
| 984. bta-miR-93<br>MIMAT0003837     | 11802                                      | -12.20                         | GTGGCAATATTGTAGCACTTTG<br>:      <br>ATGGACGTGCTTGTCTGTAAC                  | 6.2E-2  |
| 985. bta-miR-20b<br>MIMAT0003796    | 11803                                      | -16.00                         | TGGCAATATTGT-AGCACTTTG<br>: :          <br>ATGGACGTGACACTCGTGAAC            | 6.2E-2  |
| 986. bta-miR-12058<br>MIMAT0046765  | 11927                                      | -12.40                         | GC-C-TGACTAGTATTGAAGAAG<br>                  <br>CGTGTACTGATGA--CCTTCTTG    | 1.75E-1 |
| 987. bta-miR-380-3p<br>MIMAT0003804 | 13607                                      | -6.10                          | TGAACACGATTTCTTTACATT<br>      :        <br>TCTGCACCTGGTGTAATGTAT           | 2.73E-1 |
| 988. bta-miR-376e<br>MIMAT0025543   | 13962                                      | -7.30                          | TGGTATGATTTTGGTGACTATGTT<br>           <br>TTACACCTAAAA--GGAGATACAA         | 3.48E-1 |
| 989. bta-miR-381<br>MIMAT0009307    | 16270                                      | -6.00                          | TAAATGATGTT-ACCAAATTGTATC<br>     :           <br>TGTCTCT-CGAACGG--GAACATAT | 1.36E-1 |
| 990. bta-miR-2420<br>MIMAT0011987   | 16726                                      | -10.80                         | TGTATTATCGCGCCACAACCA<br>: :        <br>TTTCTTATTTGTG-TGTTGGA               | 8.13E-2 |
| 991. bta-miR-92a<br>MIMAT0009383    | 19305                                      | -13.00                         | ACTTGC-ATCACAAGATGCAATT<br>                 <br>TGTCCGGCCCTGTTC-ACGTTAT     | 2.46E-1 |
| 992. bta-miR-6525<br>MIMAT0025554   | 20639                                      | -12.70                         | TAAGTATTTGAATTCCCCAA<br>: :         <br>GAGTGAGGACGAAAGGGGTC                | 3.25E-1 |
| 993. bta-miR-668-3p<br>MIMAT0040936 | 21454                                      | -10.40                         | AAGAAGTTTTTGTG-TGACAG<br>      :        <br>CCCATCA--CCCGGCTCACTGTA         | 1.45E-1 |
| 994. bta-miR-20b<br>MIMAT0003796    | 21522                                      | -6.00                          | GACAAGC-CT--AATCACTTTA<br>             <br>ATGGACGTGACACTCGTGAAC            | 1.45E-1 |

| 1. miR Name                           | leftmost position of predicted target site | folding energy (in - Kcal/mol) | heteroduplex                                                               | p value |
|---------------------------------------|--------------------------------------------|--------------------------------|----------------------------------------------------------------------------|---------|
| 995. bta-miR-93<br>MIMAT0003837       | 21522                                      | -5.80                          | GACAAGC-CTAAT--CACTTTA<br>          :      <br>ATGGACGTGCTTGTCGTGAAAC      | 1.45E-1 |
| 996. bta-miR-92a<br>MIMAT0009383      | 21942                                      | -5.70                          | GATTTCATAAACAGCATGCAATT<br>   :      <br>TGTCGGGCCCTGTT-CACGTTAT           | 9.19E-2 |
| 997. bta-miR-12058<br>MIMAT0046765    | 22150                                      | -7.80                          | GTA-AAGA--GCTAGAAGAAG<br> :     :      <br>CGTGTACTGATGACCTTCTTG           | 3.85E-1 |
| 998. bta-miR-2450a<br>MIMAT0012030    | 22520                                      | -21.40                         | TATATGGACCTTAATCCTGCCCT<br> :        :      <br>GTGTACGTGGAG--ATGACGGGT    | 3.66E-1 |
| 999. bta-miR-369-3p<br>MIMAT0003802   | 22983                                      | -7.00                          | TTTTGTGCAATACAAAGTATTATG<br>:   :         <br>TTTCTAGTT--GGT-ACATAATAA     | 3.76E-1 |
| 1000. bta-miR-380-3p<br>MIMAT0003804  | 25243                                      | -9.00                          | ACTCCCGACCC-CATTACATC<br>        <br>TCTGCACCTGGTGTAATGTAT                 | 1.04E-1 |
| 1001. bta-miR-769<br>MIMAT0009376     | 29215                                      | -13.10                         | TGACTGTTGCT--AAGGTCTCA<br>:  :      <br>TCGAGTCTTGGGCCTCCAGAGT             | 2.11E-1 |
| 1002. bta-miR-2290<br>MIMAT0011798    | 29624                                      | -9.20                          | GGAGTTTGAATTTGCAGAGGG<br>:  :         <br>TGTTTGGCT-GGTGGTCTCCG            | 8.64E-2 |
| 1003. bta-miR-6525<br>MIMAT0025554    | 30313                                      | -13.70                         | GTGAC-CCACAGTTCCCCAT<br>            <br>GAGTGAGGACGAAAGGGGTC               | 4.98E-2 |
| 1004. bta-miR-20b<br>MIMAT0003796     | 30469                                      | -6.20                          | GATTTG-ACAGT--ACACTTTC<br> :  :           <br>ATGGACGTGACACTCGTGAAAC       | 3.29E-1 |
| 1005. bta-miR-323b-3p<br>MIMAT0040935 | 1705                                       | -10.60                         | GTAGGTTGCAAGGCTATTGTA<br>   :  :         <br>TCTCCGGCTGGCACATAACAC         | 3.11E-2 |
| 1006. bta-miR-7864<br>MIMAT0030449    | 2905                                       | -15.80                         | ACTGTGGAT--ATGGAGGAAT<br>   :  :  :      <br>AGACGGTTGGCCTTCTCCTTC         | 1.36E-1 |
| 1007. bta-miR-7864<br>MIMAT0030449    | 3145                                       | -11.30                         | GATGT-AGAAGG-TGAGGAAA<br>  :         <br>AGACGGTTGGCCTTCTCCTTC             | 2.73E-1 |
| 1008. bta-miR-2425-5p<br>MIMAT0011994 | 3453                                       | -14.70                         | AGT-GATGCAGAAAC-TGCCCTGT<br>                  <br>TCAAGTAC--CTAGGCACGGGACC | 1.22E-2 |



| 1. miR Name                            | leftmost position of predicted target site | folding energy (in - Kcal/mol) | heteroduplex                                                        | p value |
|----------------------------------------|--------------------------------------------|--------------------------------|---------------------------------------------------------------------|---------|
| 1009. bta-miR-11986c<br>MIMAT0046638   | 3516                                       | -5.50                          | TAAGCAACAGTATAGTCAGTTG<br>  :      <br>AGAAAAGGTTTCCTGAGTCAAG       | 2.58E-1 |
| 1010. bta-miR-10184-3p<br>MIMAT0040943 | 3650                                       | -9.10                          | CATACTGG--AAATGCATTAAA<br>  :      <br>GGTAACCCAAAAGATGTAATTT       | 3.34E-1 |
| 1011. bta-miR-2284v<br>MIMAT0011937    | 3980                                       | -6.00                          | CATTTTCAA-TGACTACTTTTG<br>:    :      <br>TTTGGGGTTTGCT-TGAAAAA     | 2.11E-1 |
| 1012. bta-miR-2284d<br>MIMAT0011836    | 5796                                       | -8.30                          | TAAAAATTGAAACAACTTTTA<br>    ::      <br>CTTTTGGG-ATTGCTTGAAAAA     | 2.39E-2 |
| 1013. bta-miR-2284v<br>MIMAT0011937    | 5799                                       | -10.30                         | AAATTTGAAACAACTTTTA<br>    ::      <br>TTTGGGGTTTGCTTGAAAAA         | 2.39E-2 |
| 1014. bta-miR-2284d<br>MIMAT0011836    | 6130                                       | -5.60                          | GAAAGGGTGTATTACTTTTG<br>    ::  :      <br>CTTTTGGGATTGCTTGAAAAA    | 2.14E-1 |
| 1015. bta-miR-2284v<br>MIMAT0011937    | 6929                                       | -6.00                          | GGATTAAGAAC--ACTTTTA<br>:: :::      <br>TTTGGGGTTTGCTTGAAAAA        | 2.28E-1 |
| 1016. bta-miR-2284v<br>MIMAT0011937    | 7547                                       | -6.10                          | ATAAACCAAGTAATACTTTTA<br>   :::      <br>TTTGGGGTTTGCT-TGAAAAA      | 2.94E-1 |
| 1017. bta-miR-323b-3p<br>MIMAT0040935  | 8944                                       | -7.40                          | GGTAGTCCACAACCTTATTGTT<br>:    :         <br>TCTCCGGCTG-GCACATAACAC | 3.62E-1 |
| 1018. bta-miR-2284d<br>MIMAT0011836    | 9692                                       | -8.50                          | AAATGGCTCTTAC-TACTTTTA<br>:: :         <br>CTTTTGGGATTGCTTGAAAAA    | 1.98E-1 |
| 1019. bta-miR-2284v<br>MIMAT0011937    | 9695                                       | -7.60                          | TGGCTCT-TAC-TACTTTTA<br>:: :         <br>TTTGGGGTTTGCTTGAAAAA       | 1.98E-1 |
| 1020. bta-miR-12005<br>MIMAT0046666    | 9921                                       | -9.50                          | TGCTTCCGTTT--CAACTTCAT<br>   :         <br>TGGGAGGGGAATTCCTGAAGTA   | 7.65E-2 |
| 1021. bta-miR-323b-3p<br>MIMAT0040935  | 9941                                       | -14.00                         | TCTTGCAATCTG-GTATTGTG<br>    :      <br>TCTCCGGCTGGCACATAACAC       | 7.65E-2 |
| 1022. bta-miR-323b-3p<br>MIMAT0040935  | 9981                                       | -16.60                         | TAAGGTAGAACCATGTATTGTC<br>   :         <br>TCTCCGGCT-GGCACATAACAC   | 7.65E-2 |

| 1. miR Name                            | leftmost position of predicted target site | folding energy (in - Kcal/mol) | heteroduplex                                                                  | p value |
|----------------------------------------|--------------------------------------------|--------------------------------|-------------------------------------------------------------------------------|---------|
| 1023. bta-miR-208b<br>MIMAT0009262     | 10165                                      | -13.30                         | CTAAGCCTTACAGTGATGTCTTAT<br>  :        :       <br>TGTTTGGAA-AACA-AGCAGAATA   | 3.56E-2 |
| 1024. bta-miR-7864<br>MIMAT0030449     | 11320                                      | -13.50                         | GGTTCTAACT--TAGAGGAAG<br>:   :      <br>AGACGGTTGGCCTTCTCCTTC                 | 2.73E-1 |
| 1025. bta-miR-302a<br>MIMAT0009278     | 11800                                      | -9.90                          | TTGTGGCAATATTGTAGCACTT<br>  :         <br>AGTGATTTTGTACCTTCGTGAA              | 6.2E-2  |
| 1026. bta-miR-11986c<br>MIMAT0046638   | 11860                                      | -13.90                         | GCTTTTGAAAAGCTTGCTCAGTTG<br>           :       <br>AGAAAAGGTTTC--CTGAGTCAAG   | 1.67E-1 |
| 1027. bta-miR-6715<br>MIMAT0046369     | 11911                                      | -15.90                         | GCTGTGGAT-AGCAAGTGCCTGA<br>    :  :        <br>CGA-GTTTGACCG-GCACGGACA        | 1.75E-1 |
| 1028. bta-miR-323b-3p<br>MIMAT0040935  | 16296                                      | -8.60                          | GGTGGTATGTCATATTATTGTG<br>    : :         <br>TCTCCG-GCTGGCACATAACAC          | 1.36E-1 |
| 1029. bta-miR-134<br>MIMAT0009227      | 16942                                      | -17.60                         | GACCTCCTGGTACAGGAAAGTCACA<br>            :      <br>GGTGAG-ACCA-GTT-GGTCAGTGT | 1.11E-1 |
| 1030. bta-miR-1388-3p<br>MIMAT0013591  | 17172                                      | -14.50                         | ACTATAAATGCATTACCTGAGAT<br>:         <br>ACGCCC GACTGT-TTGGACTCTA             | 3.39E-1 |
| 1031. bta-miR-10180-3p<br>MIMAT0040938 | 18311                                      | -22.80                         | GGCTGTGGCTAAAGCTCCTCCTG<br>:    :      :     <br>TCG-TGTCG--CGCGGGGAGGAG      | 2.5E-1  |
| 1032. bta-miR-323b-3p<br>MIMAT0040935  | 18671                                      | -5.60                          | TAATCATGATT-TATATTGTA<br>:   :        <br>TCTCCGCTGGCACATAACAC                | 2.36E-2 |
| 1033. bta-miR-10180-3p<br>MIMAT0040938 | 18704                                      | -22.10                         | AGCACA-TGT-TGCCTCCTC<br>      :  :        <br>TCGTGTGCGCGGGGAGGAG             | 2.36E-2 |
| 1034. bta-miR-1388-3p<br>MIMAT0013591  | 20025                                      | -16.10                         | AGCCAATTCGACAG-CCTGAGAG<br>        :      <br>ACG-CCCGACTGTTTGGACTCTA         | 7.09E-2 |
| 1035. bta-miR-2308<br>MIMAT0011820     | 20048                                      | -16.60                         | CAGCTCT--AACCAGAGCCCAC<br>:     :      <br>AATGAGAGACGACGTTCTGGGTT            | 7.09E-2 |
| 1036. bta-miR-11986c<br>MIMAT0046638   | 20521                                      | -13.40                         | TTGATTTTAAAGATTTTCAGTTC<br>  :     :      <br>AGAAAAGGTTTC-CTGAGTCAAG         | 3.16E-1 |

| 1. miR Name                            | leftmost position of predicted target site | folding energy (in - Kcal/mol) | heteroduplex                                                                   | p value |
|----------------------------------------|--------------------------------------------|--------------------------------|--------------------------------------------------------------------------------|---------|
| 1037. bta-miR-6715<br>MIMAT0046369     | 20846                                      | -17.70                         | TCTTAGGCAGTGGT - -TGCCTGC<br>  : ::     :      <br>CGAGTTTG - -ACCGGCACGGACA   | 2.78E-1 |
| 1038. bta-miR-2457<br>MIMAT0012042     | 21198                                      | -16.20                         | AGTGAAGGGTTTT-TAATTGGCAT<br>  :    : :  :       <br>TCGC - -GCCGAGACGTCAACCGTT | 2.01E-1 |
| 1039. bta-miR-2285ba<br>MIMAT0046373   | 21549                                      | -11.59                         | CCACTTACCCAGTTTGAGGGTTT<br>       :      <br>GGTTTTTCAAGCAAG-TCCCAAA           | 1.45E-1 |
| 1040. bta-miR-2403<br>MIMAT0011960     | 22161                                      | -15.70                         | GAAGAAGGTGATCTTCCCGAG<br> :      <br>TTCCGGTCGATCGAAGGGCTC                     | 3.85E-1 |
| 1041. bta-miR-653<br>MIMAT0009358      | 22620                                      | -9.60                          | ACACAGGCGA - -AGGTCAACAA<br>   :         <br>GTTGTCT-CTAACAAAGTTGTG            | 1.86E-1 |
| 1042. bta-miR-10180-3p<br>MIMAT0040938 | 26571                                      | -16.30                         | TGC-TAGTCTGTTTCCTCCTT<br>   :  : : ::      <br>TCGTGTCGCGCGG-GGAGGAG           | 3.46E-2 |
| 1043. bta-miR-653<br>MIMAT0009358      | 27332                                      | -10.20                         | TAATGCTGAACATTTCAACAC<br>:   ::         <br>GTTGTCTCTAACAAAGTTGTG              | 6.88E-2 |
| 1044. bta-miR-12051<br>MIMAT0046754    | 27468                                      | -14.90                         | AATGAATAGGT - -TACAGGAGG<br>   :   :       <br>AGCCTTGCTCTACGACGTCCTCA         | 2.14E-1 |
| 1045. bta-miR-1388-3p<br>MIMAT0013591  | 28112                                      | -18.20                         | GGACATCTGG-AGACCTGAGAT<br>   :  :     <br>ACGCCCCACTGTTTGGA CTCTA              | 3.03E-1 |
| 1046. bta-miR-12051<br>MIMAT0046754    | 29650                                      | -12.90                         | GTGTGCCTATTGCACCAGGAGT<br>         <br>AGCCTTGCTCTACGACGTCCTCA                 | 2.69E-1 |
| 1047. bta-miR-12005<br>MIMAT0046666    | 29979                                      | -10.40                         | GCTCCTAATTCCAGATCTACTTCAC<br>:       :        <br>TG-GGA - -GGGGAATTCTGAAGTA   | 2.01E-1 |
| 1048. bta-miR-2366<br>MIMAT0011904     | 30298                                      | -15.80                         | TAAAACTTGGA ACTAGTGACCCA<br>  ::         <br>GGTCTGGGAGAAGA-CACTGGGT           | 4.98E-2 |
| 1049. bta-miR-29c<br>MIMAT0003829      | 2236                                       | -13.70                         | TTTCATGTTTTGCATGGTGCTT<br>:    :        <br>ATTGGCTAAAGTTTACCACGAT             | 2.61E-1 |
| 1050. bta-miR-2399-5p<br>MIMAT0011954  | 3443                                       | -21.60                         | CAGTTTTGGCAGTGATGCAGAAAC<br>   : :  :  :     <br>ATCAAGGTTGTCG - -ATGTCTTTC    | 1.22E-2 |

| 1. miR Name                           | leftmost position of predicted target site | folding energy (in - Kcal/mol) | heteroduplex                                                              | p value |
|---------------------------------------|--------------------------------------------|--------------------------------|---------------------------------------------------------------------------|---------|
| 1051. bta-miR-2367-5p<br>MIMAT0011909 | 4284                                       | -17.00                         | ACCTGATG-C-GAGGACACAGGGT<br>                <br>GAGACTACCGACTC-AATGTCCCA  | 1.75E-1 |
| 1052. bta-miR-2284m<br>MIMAT0011976   | 5798                                       | -14.00                         | AAAATTGAAACAACTTTTA<br>   ::       <br>TTTTGGGCTT-GTTTGAAAAG              | 2.39E-2 |
| 1053. bta-miR-2330-5p<br>MIMAT0011861 | 5916                                       | -14.30                         | TCAG-C-GTATTATTAAAGCCCA<br>:      :   :      <br>GGTCAGGAGTGACGGGTTCGGGT  | 6.48E-2 |
| 1054. bta-miR-197<br>MIMAT0009257     | 6260                                       | -15.00                         | ATGATGTTGACGATGGTGGTGAT<br>           <br>CGACCCACCT-CTTCCACCACTT         | 3.52E-1 |
| 1055. bta-miR-29c<br>MIMAT0003829     | 6787                                       | -12.30                         | AGTGTGGTTGCTAGA-GGTGCTT<br>:   :   :        <br>ATTGGCTAA-AGTTTACCACGAT   | 3.52E-1 |
| 1056. bta-miR-2362<br>MIMAT0011900    | 6908                                       | -13.20                         | TTGTTGGTAAGATCG-CACAGTG<br>:   :      <br>CCAGTCTTGCGAGGTAGTGTCAC         | 2.28E-1 |
| 1057. bta-miR-2284m<br>MIMAT0011976   | 6928                                       | -5.40                          | TGGATTAAAGAAC--ACTTTTA<br>: :   :           <br>TTTTG-GGCTTGTTTGAAAAG     | 2.28E-1 |
| 1058. bta-miR-2284m<br>MIMAT0011976   | 7548                                       | -6.20                          | TAAACCAGGTAATACTTTTA<br>     :      <br>TTTTGGGCTTGTTTGAAAAG              | 2.94E-1 |
| 1059. bta-miR-2362<br>MIMAT0011900    | 8530                                       | -7.60                          | TTAATGCCCACTT--ACACAGTA<br>    :      <br>CCAGTCTTGCGAGGTAGTGTCAC         | 5.51E-2 |
| 1060. bta-miR-761<br>MIMAT0009373     | 8817                                       | -11.00                         | TATTACACATGCACTTTCTGCTGA<br>       :      <br>ACACAGTCAAAGTGG--GACGACG    | 1.54E-1 |
| 1061. bta-miR-29c<br>MIMAT0003829     | 9299                                       | -14.60                         | CTGCTAGTTCCATTGCTGGTGCTA<br>:   :            <br>ATTGGCTAAAGT--TTACCACGAT | 2.28E-1 |
| 1062. bta-miR-2284m<br>MIMAT0011976   | 9694                                       | -7.50                          | ATGGCTCTTAC-TACTTTTA<br>: :   :         <br>TTTTGGGCTTGTTTGAAAAG          | 1.98E-1 |
| 1063. bta-miR-2355-5p<br>MIMAT0011891 | 9932                                       | -7.60                          | CAACTTCATTC-TTGCAATCTGGT<br>:            <br>CGTATAACAGGTAAC-ATAGACCC     | 7.65E-2 |
| 1064. bta-miR-194<br>MIMAT0009254     | 9990                                       | -9.30                          | ACCATGTATTGTCAGTGTACC<br>    : :           <br>AGGTGTACCTCAACGACAATGT     | 7.65E-2 |

| 1. miR Name                            | leftmost position of predicted target site | folding energy (in - Kcal/mol) | heteroduplex                                                                | p value |
|----------------------------------------|--------------------------------------------|--------------------------------|-----------------------------------------------------------------------------|---------|
| 1065. bta-miR-2330-3p<br>MIMAT0011862  | 10303                                      | -15.04                         | AACGGCAAACCACAAGGAGC<br>           <br>CTGCCGGTCCCCATTCTCA                  | 3.62E-1 |
| 1066. bta-miR-2285x<br>MIMAT0029946    | 10472                                      | -6.30                          | CTGA--TTTCAATGGGGATTTTTA<br>          :      <br>GGTTTTCAAGT-AAGTCTAAAAAG   | 8.51E-2 |
| 1067. bta-miR-376b<br>MIMAT0009945     | 10691                                      | -12.00                         | TAGATGCTTTAGCTTCTATGAC<br>        :      <br>TTGTACCTAAAAGGAGATACTA         | 3.07E-1 |
| 1068. bta-miR-2355-5p<br>MIMAT0011891  | 11832                                      | -13.90                         | AATACTTG-CCACTTCTGATCTGGG<br>             <br>CGTATAACAGGT--AACATAGACCC     | 6.2E-2  |
| 1069. bta-miR-10165-5p<br>MIMAT0040912 | 11969                                      | -15.10                         | ACAATACTGTT--TTGCAGGCT<br>:    : :      <br>CACAGGAGCAGTGGACGTCCGA          | 2.39E-1 |
| 1070. bta-miR-194<br>MIMAT0009254      | 16174                                      | -13.00                         | TTTGC-TGCAAGTGTGTTACG<br>  :         :      <br>AGGTGTACCTCAACGACAATGT      | 5.43E-2 |
| 1071. bta-miR-2399-5p<br>MIMAT0011954  | 17731                                      | -16.00                         | TATATTCA-CAGACTGCAGAAAC<br>  :           :      <br>ATCAAGGTTGTC-GATGTCTTTC | 1.09E-1 |
| 1072. bta-miR-6516<br>MIMAT0030443     | 18857                                      | -10.20                         | TAAAGCTGCCATG-CTCTGCAAC<br>:   :            <br>CAAGTG-TGG-ACAATGACGTTT     | 6.11E-2 |
| 1073. bta-miR-376b<br>MIMAT0009945     | 18933                                      | -11.70                         | GATTTTGATTTTAAGTTCTATGAT<br>      :      <br>TTGTACCTAAAA--GGAGATACTA       | 2.25E-1 |
| 1074. bta-miR-197<br>MIMAT0009257      | 19514                                      | -14.50                         | TTATACAGGA-CAGGCTGGTGAA<br>             <br>CGACCCACCTCTTCC-ACCACTT         | 1.98E-1 |
| 1075. bta-miR-154c<br>MIMAT0025542     | 20733                                      | -11.70                         | TATACTCAGTTATGTCAATATCT<br>    : :         <br>TCTCTAGTTGGCAC-GTTATAGA      | 1.92E-1 |
| 1076. bta-miR-2330-3p<br>MIMAT0011862  | 20808                                      | -14.50                         | GCAGGTTTCAG-AAAAAGGAGT<br>   :          <br>CTGCCG-GTCCCCATTCTCA            | 2.61E-1 |
| 1077. bta-miR-2362<br>MIMAT0011900     | 21286                                      | -9.60                          | GG--AGAA--ATTCT--CACAGTT<br>          :      <br>CCAGTCTTGCGAGGTAGTGTAC     | 7.65E-2 |
| 1078. bta-miR-29c<br>MIMAT0003829      | 21298                                      | -12.00                         | CAGTTTGAACGGG-GGTGCTT<br>  : :      <br>ATTGGCTAAAGTTTACCACGAT              | 7.65E-2 |

| 1. miR Name                           | leftmost position of predicted target site | folding energy (in - Kcal/mol) | heteroduplex                                                     | p value |
|---------------------------------------|--------------------------------------------|--------------------------------|------------------------------------------------------------------|---------|
| 1079. bta-miR-2285ar<br>MIMAT0046337  | 21552                                      | -9.10                          | CTTACCCAGTTTG - -AGGGTTT<br>   : <br>CGGTTTTTCAAGTAGTCCCAA       | 1.45E-1 |
| 1080. bta-miR-376b<br>MIMAT0009945    | 22098                                      | -7.40                          | CCCACTGATAAGCTAGCTATGAT<br>   : <br>TTGTACCTAAAAGG-AGATACTA      | 3.48E-1 |
| 1081. bta-miR-2362<br>MIMAT0011900    | 25873                                      | -11.90                         | GTTCAAACATGTGATCTCACAGTA<br>   : <br>CCAGT-CTTGCGAGGTAGTGTAC     | 1.98E-1 |
| 1082. bta-miR-2362<br>MIMAT0011900    | 26141                                      | -15.40                         | ATGCAGCATGT-AAATCACAGTT<br>   : <br>CCAGTCTTGCGAGGTAGTGTAC       | 1.78E-1 |
| 1083. bta-miR-2285ar<br>MIMAT0046337  | 29330                                      | -13.12                         | GCCA-TCAACCCAAAAGGGTTC<br>   : <br>CGGTTTTTCAAGTAGTCCCAA         | 3.48E-1 |
| 1084. bta-miR-761<br>MIMAT0009373     | 29737                                      | -19.00                         | GCAACCAGCGTCA-ACTGCTGC<br>   : <br>ACACAGTCAAAGTGGGACGACG        | 1.11E-1 |
| 1085. bta-miR-2399-5p<br>MIMAT0011954 | 30173                                      | -6.90                          | CAAAGAAATCAG--ACAGAAAA<br>   : <br>ATCAAGGTTGTCGATGTCTTTC        | 5.91E-3 |
| 1086. bta-miR-2330-5p<br>MIMAT0011861 | 30185                                      | -14.60                         | ACAGAAAATTTTGAATAAGCCCC<br>   : <br>GGTCAGGAGTGACGGGTTCGGGT      | 5.91E-3 |
| 1087. bta-miR-2362<br>MIMAT0011900    | 30302                                      | -13.00                         | ACTTGGAAGTAGTGACC--CACAGTT<br>   : <br>CCAGTCTTG--CG-AGGTAGTGTAC | 4.98E-2 |
| 1088. bta-miR-2399-5p<br>MIMAT0011954 | 30719                                      | -8.50                          | TACTGAAGACACCT-CAGAAAT<br>:   : <br>ATCAAGGTTGTCGATGTCTTTC       | 2.39E-1 |
| 1089. bta-miR-194b-3p<br>MIMAT0040934 | 245                                        | -10.80                         | ACTGGGCTCCAGAATTTCCATGG<br>   : <br>GCTAACATTGTCGTTGAGGTACA      | 8.01E-2 |
| 1090. bta-miR-2898<br>MIMAT0013856    | 319                                        | -16.30                         | GATATAGTATGCTCCACCA<br>:   : <br>AGGGGCCGTA-GAGGTGGT             | 1.54E-1 |
| 1091. bta-miR-450a<br>MIMAT0003834    | 325                                        | -9.32                          | GTATGCTCCACCACTGCGCAAAA<br>:   : <br>TATA-ATCCTTGTGTAGCGTTTT     | 1.54E-1 |
| 1092. bta-miR-2285dj<br>MIMAT0046747  | 2944                                       | -8.20                          | GCCATAGA--AGAG-AAACTTTC<br>: : : <br>CCCTGTTTGACTTGTTTGAAAG      | 2.42E-1 |

| 1. miR Name                           | leftmost position of predicted target site | folding energy (in - Kcal/mol) | heteroduplex                                                                       | p value |
|---------------------------------------|--------------------------------------------|--------------------------------|------------------------------------------------------------------------------------|---------|
| 1093. bta-miR-194b-3p<br>MIMAT0040934 | 2950                                       | -11.40                         | GAAGAGAAAC - - TTTCTCCATGT<br>         <br>GCTAACATTGTCGTTGAGGTACA                 | 2.42E-1 |
| 1094. bta-miR-2285ae<br>MIMAT0030448  | 3094                                       | -11.70                         | ACAGCTCCTGAAGATGATGACTTTCT<br>   :            <br>CTTTTTGGATT - - TACT - - TGAAAGA | 1.72E-1 |
| 1095. bta-miR-544a<br>MIMAT0009346    | 3445                                       | -11.50                         | GTTTTGGC - AGTGATGCAGAAA<br>   :   <br>CTTGAACGATTTTACGTCTTA                       | 1.22E-2 |
| 1096. my-mir-noheader-<br>provided-33 | 3448                                       | -12.49                         | TTGGCAGTGATGCAGAAACTGCCC<br>   :      <br>GTTAGTCG - - ATTAATGTGACGGA              | 1.22E-2 |
| 1097. bta-miR-3613a<br>MIMAT0024574   | 5125                                       | -6.85                          | GAATTGCTTGCCACTACAACA<br>   :      <br>CTTGTTTTTTTTTCATGTTGT                       | 9.05E-2 |
| 1098. bta-miR-27a-3p<br>MIMAT0003532  | 5987                                       | -12.00                         | TAGGAC - ACACCGTCTGTGAT<br> :   : <br>GCCTTGAATCGGT - GACACTT                      | 2.94E-1 |
| 1099. bta-miR-2422<br>MIMAT0011989    | 6172                                       | -14.80                         | AGCCATGAGC - - AAGCTTCCCTCAA<br>   :   : <br>GAGG - - CGTGGAGTC - AGGGGAGTT        | 3.34E-1 |
| 1100. bta-miR-1343-3p<br>MIMAT0011840 | 8728                                       | -11.90                         | GTTGTTGCTGTAGTAGACCAGGAT<br>     : <br>CTCTCACG - - CCCG - - GGGTCCTC              | 3.52E-1 |
| 1101. bta-miR-2285ae<br>MIMAT0030448  | 8814                                       | -9.50                          | CTTTATTACACATGCACTTTCT<br>         <br>CTTTTTGGATTTACTTGAAAGA                      | 1.54E-1 |
| 1102. bta-miR-2286<br>MIMAT0011793    | 8896                                       | -14.90                         | AGTGGCTGTGTGCTTTC - CTCTGCTTG<br> :  :   :   : <br>TAATTGTGTAGC - AAGGCGGGACGAAG   | 2.69E-1 |
| 1103. bta-miR-130b<br>MIMAT0009224    | 8903                                       | -19.60                         | GTGTGCTTTCCTCTGCTTGCACTA<br>:   :   : <br>TACGGGAAAGTAG - - TAACGTGAC              | 2.69E-1 |
| 1104. bta-miR-2285bh<br>MIMAT0046388  | 8944                                       | -7.00                          | GG - - TAGTCC - - AC - AACCTTA<br>:         <br>TCTTTTTGGGCTTGCTTGAAAA             | 3.62E-1 |
| 1105. bta-miR-2286<br>MIMAT0011793    | 10064                                      | -19.20                         | CCAGACATGT - GATATGTTCTGCTTC<br>:   :  :   : <br>TAATTGTGTAGCAAGGCGGGACGAAG        | 1.75E-1 |
| 1106. bta-miR-2301<br>MIMAT0011812    | 10295                                      | -8.60                          | CTGCTTATAACGGCAAACCAC<br>    :   <br>TTCTCCCTTGGT - TTTGGTG                        | 3.62E-1 |

| 1. miR Name                           | leftmost position of predicted target site | folding energy (in - Kcal/mol) | heteroduplex                                                                          | p value |
|---------------------------------------|--------------------------------------------|--------------------------------|---------------------------------------------------------------------------------------|---------|
| 1107. bta-miR-153<br>MIMAT0009239     | 10416                                      | -13.60                         | TGTTAAATTTGTGTATATGCAT<br>:   :                    <br>CTAGTGAAAACACTGATACGTT         | 3.24E-2 |
| 1108. bta-miR-1814b<br>MIMAT0011908   | 10530                                      | -12.70                         | CGTTCAGGATTATATACAATCT<br>  :     : :   :            <br>GTTTGTTTTGAT - - TTGTTAGA    | 8.51E-2 |
| 1109. bta-miR-507-3p<br>MIMAT0040915  | 11676                                      | -15.40                         | GGGTATTGGAGGTGTGCCAAT<br>  : :   :          <br>AAGTAAGGTTCTGTACGGTTA                 | 3.07E-1 |
| 1110. bta-miR-2286<br>MIMAT0011793    | 12110                                      | -10.50                         | CCTGTAATATTG - CTAAATCTGCTTA<br>  :   :   :            <br>TAATTGTGTAGCAAGGCGGGACGAAG | 3.46E-2 |
| 1111. bta-miR-6520<br>MIMAT0025538    | 12635                                      | -7.20                          | AGACTTGTAAATACACCTACTCAA<br>    :                  <br>CGAGAG - AGACTGT - TATGAGTT    | 2.18E-1 |
| 1112. bta-miR-7857-3p<br>MIMAT0040925 | 13759                                      | -14.90                         | TATATGCT - GGTG - TGAACAAT<br>    :                    <br>TTTCTCGGTCCAACCTCTTGTTA    | 1.32E-1 |
| 1113. bta-miR-12021<br>MIMAT0046714   | 16114                                      | -7.90                          | GCGTGGTCTGCTCTTCTCAA<br>    :                  <br>TCGACCGTCTAAAAAGAGTT               | 5.43E-2 |
| 1114. bta-miR-2346<br>MIMAT0011881    | 16142                                      | -12.20                         | ACGTTGTGGCAGTTGCATCAGA<br>: :                  <br>CGGTTTGGTGGAAGTGTAGTCA             | 5.43E-2 |
| 1115. bta-miR-1343-3p<br>MIMAT0011840 | 16243                                      | -12.70                         | ATGTGTGTAACGCACCAGGAT<br>    :                  <br>CTCTCACG - CCCGGGGTCCTC           | 1.36E-1 |
| 1116. bta-miR-1814b<br>MIMAT0011908   | 16369                                      | -8.80                          | TTGGTCTATATAAACAATCT<br>                     <br>GTTTGTTTTGATTGTGTTAGA                | 3.57E-1 |
| 1117. bta-miR-7857-3p<br>MIMAT0040925 | 16872                                      | -8.40                          | CTTGAGACA - - TTTCAGAACAAT<br>                       <br>TTTCTCGGTCCAACCTCTTGTTA      | 2.82E-1 |
| 1118. bta-miR-30b-5p<br>MIMAT0003547  | 17151                                      | -6.70                          | ACTCGTAAGTA - TGTGTTTACT<br>      :              <br>TCGACTCACATCCTACAAATGT           | 3.39E-1 |
| 1119. bta-miR-544a<br>MIMAT0009346    | 17730                                      | -9.10                          | ATATATTCACAGACTGCAGAAA<br>  :                  <br>CTTGAACGATTTTACGTCTTA              | 1.09E-1 |
| 1120. bta-miR-568<br>MIMAT0009350     | 19769                                      | -13.20                         | TGGTGTCTGCATGTATACAG<br>          :            <br>CACACATATGTAAATATGTA               | 2.61E-1 |



| 1. miR Name                           | leftmost position of predicted target site | folding energy (in - Kcal/mol) | heteroduplex                                                                                    | p value |
|---------------------------------------|--------------------------------------------|--------------------------------|-------------------------------------------------------------------------------------------------|---------|
| 1121. bta-miR-130b<br>MIMAT0009224    | 20413                                      | -11.30                         | GTGGTAGTAAGAGTGTTCACACTG<br>:    : :               <br>TACGG - - GAAAGTAGTAACGTGAC              | 2.21E-1 |
| 1122. bta-miR-3613a<br>MIMAT0024574   | 20748                                      | -5.80                          | CAATATCTGAA - TACTACAACA<br>   : :                  <br>CTTGTTTTTTTTTTCATGTTGT                  | 1.92E-1 |
| 1123. bta-miR-338<br>MIMAT0009292     | 20849                                      | -13.20                         | TAGGCAGTGGTTGC - - CTGCTGGT<br>: :    : :                  <br>AGTTGTT - TTAGTGACTACGACCT       | 2.78E-1 |
| 1124. bta-miR-544a<br>MIMAT0009346    | 21111                                      | -16.30                         | GAGTTTTCTTGAATGCAGAAT<br>         :                     <br>CTTGAACGATTTTACGTCCTTA              | 3.16E-1 |
| 1125. bta-miR-2422<br>MIMAT0011989    | 21972                                      | -16.60                         | AAAATCACTATCA - ACCCCTCAT<br>    :                      <br>GAGGCGTGG - AGTCAGGGGAGTT           | 9.19E-2 |
| 1126. bta-miR-425-3p<br>MIMAT0003833  | 22159                                      | -13.40                         | TAGAAGAAGGTGATCTTCCCGAG<br>   :    :                     <br>CCCGCCT - GTGCTGTAAGGGCTA          | 3.85E-1 |
| 1127. bta-miR-1814b<br>MIMAT0011908   | 22806                                      | -9.70                          | ATAATGGCTCTGCACAATCT<br>   :    :                     <br>GTTTGTTTTGATTGTGTTAGA                 | 3.25E-1 |
| 1128. bta-miR-361<br>MIMAT0003830     | 23235                                      | -13.40                         | ATGCC - - AGG - CAGTCTGATAA<br>  :                              <br>CATGGGGACCTCTAAGACTATT      | 1.89E-1 |
| 1129. bta-miR-2285bh<br>MIMAT0046388  | 25596                                      | -9.20                          | TTATAATAGTTGGCAGAACCTTT<br>: :                              <br>TCTTTTTTGGGCTTG - CTTGGAAA      | 2.65E-1 |
| 1130. bta-miR-27a-3p<br>MIMAT0003532  | 26168                                      | -13.60                         | AATATGGTAGCTTCTGTGAC<br>    :                           <br>GCCTTGAATCGGTGACACTT                | 4.38E-2 |
| 1131. bta-miR-489<br>MIMAT0009942     | 27124                                      | -13.30                         | GTC - CCTACTAAGT - ATGTCAC<br>                                 <br>CAGCGGTATATACACTACAGTG       | 2.14E-1 |
| 1132. bta-miR-194b-3p<br>MIMAT0040934 | 27341                                      | -11.80                         | ACATTTCAACACCCAACCTCCATGA<br>                                 <br>GCTAACATTGT - CGTTG - AGGTACA | 6.88E-2 |
| 1133. bta-miR-1343-3p<br>MIMAT0011840 | 27683                                      | -14.60                         | ATTATACTGGACACCAGGAG<br>:                              <br>CTCTCACGCCCCGGGGTCCCTC               | 2.21E-1 |
| 1134. bta-miR-2285dj<br>MIMAT0046747  | 28048                                      | -10.90                         | AGG - TAGACCT - - TATAACTTTA<br>   : :                              <br>CCCTGTTTGACTTGTTTGAAAG  | 2.5E-1  |

| 1. miR Name                          | leftmost position of predicted target site | folding energy (in - Kcal/mol) | heteroduplex                                                                       | p value |
|--------------------------------------|--------------------------------------------|--------------------------------|------------------------------------------------------------------------------------|---------|
| 1135. bta-miR-507-3p<br>MIMAT0040915 | 28068                                      | -7.84                          | AGCATT - -ATTAATTGCCAAA<br>           <br>AAGTAAGGTTCTGTACGGTTA                    | 2.5E-1  |
| 1136. bta-miR-2285b<br>MIMAT0011833  | 29181                                      | -7.10                          | ACTGGCTATTCTTTGTCAGATTG<br>          <br>GGTTTTTCAAG - -TGAGTCTAAAA                | 2.11E-1 |
| 1137. bta-miR-2285di<br>MIMAT0046746 | 29330                                      | -12.60                         | GCCA - -TCAACCCAAAAGGGTTC<br>:              <br>TGGTTTTACAAGGAAGTCCCAA             | 3.48E-1 |
| 1138. bta-miR-2285dj<br>MIMAT0046747 | 29370                                      | -6.90                          | TTGAGAAATAATATCTAACTTTA<br>       : :      <br>CCCTGTTTG - GACTTGTGTTGAAAG         | 3.85E-1 |
| 1139. bta-miR-2346<br>MIMAT0011881   | 29541                                      | -13.00                         | GCTACTTCTCAGCTAC - CATCAGG<br>   :                <br>CGGT - TTG - GTGGAAGTGTAGTCA | 7.91E-3 |
| 1140. bta-miR-196b<br>MIMAT0009256   | 30050                                      | -21.20                         | TTCTGGCAACAGAACCCCTACCTC<br>  :   :            <br>AGGGTTGTTGTC - CTTTGATGGAT      | 2.94E-1 |
| 1141. bta-let-7f<br>MIMAT0003519     | 30052                                      | -12.40                         | CTGGCAACAGAACCCCTACCTCT<br>    :        <br>TTGATATGTT - AGATGATGGAGT              | 2.94E-1 |
| 1142. bta-miR-507-3p<br>MIMAT0040915 | 30157                                      | -11.70                         | TAAC TAAGCAGAC - TGCCAAA<br>           <br>AAGTAAGGTTCTGTACGGTTA                   | 5.91E-3 |
| 1143. bta-miR-130b<br>MIMAT0009224   | 30218                                      | -17.02                         | GAGCCCCAATAAAACAATGCACTG<br>              <br>TACGGG - AAAGTAGTAACGTGAC            | 5.91E-3 |
| 1144. bta-miR-544a<br>MIMAT0009346   | 30383                                      | -14.80                         | AGAGTTGGCCAAAGTGCAGAAT<br>:           :      <br>CTTGAACGATTTTACGTCTTA             | 1.09E-1 |
| 1145. bta-miR-2285b<br>MIMAT0011833  | 30453                                      | -6.60                          | TATAATGGTGCAATTAGATTTG<br>       :      <br>GGTTTTTCAAGTGAGTCTAAAA                 | 3.29E-1 |
| 1146. bta-miR-2285ae<br>MIMAT0030448 | 30465                                      | -5.70                          | ATTAGATTTGACAGTACACTTTCA<br>  : : :        <br>CTTTTTTGATT - -TACTTGAAAGA          | 3.29E-1 |
| 1147. bta-miR-2301<br>MIMAT0011812   | 30557                                      | -15.70                         | GAATATGAGTCCAAAACCAC<br>   :      <br>TTCTCCCTTGGTTTGGTG                           | 3.66E-2 |
| 1148. bta-miR-2346<br>MIMAT0011881   | 30671                                      | -13.60                         | GTTGA - CTGCAGAGGACATCAGC<br>  :            <br>CGGTTTGGTG - GAAGTGTAGTCA          | 1.28E-1 |

| 1. miR Name                          | leftmost position of predicted target site | folding energy (in - Kcal/mol) | heteroduplex                                                                 | p value |
|--------------------------------------|--------------------------------------------|--------------------------------|------------------------------------------------------------------------------|---------|
| 1149. bta-miR-2285bh<br>MIMAT0046388 | 30734                                      | -17.50                         | AGAAATATAAGAGAATGAACCTTA<br>       :    :       <br>TCTTTTGG--GGCTTGCTTGAAAA | 2.39E-1 |
